# Supplementary material for: Leveraging the potential of nature to meet net zero greenhouse gas emissions in Washington State
Source: PeerJ. 2021 Jul 21;9:e11802. doi: 10.7717/peerj.11802 (PMC8308619; doi:10.7717/peerj.11802)
Supplement: Supplemental Information 1 — A data dictionary is included as a tab in this file. [file peerj-09-11802-s001.xlsx]

## Sheet: S1
Pathway	Scenario	Explanation of scenario
ifm	low	Increases annually by 10% of the historical variation over the first decade to 100% of the historical variation, then drops and holds steady at 50% of the historical variation for the last two decades.
ifm	mod	Increases annually by 10% of a maximum proportion of the historical variation over the first decade to reach that maximum, then holds steady over the last two decades at that maximum proportion of the historical variation. Maximum proportions of each ownership type are: 0.75 (Federal), 0.75 (Other), 0.30 (Private), 0.15 (State), and 0.30 (Additional sequestration when avoiding clearcutting on Pri…
ifm	amb	Rates in western counties vary by ownership, but all ownerships in eastern counties use a single rate. In the west, annual increases are exponential over the first decade to reach a maximum proportion of the historical variation, then holds steady over the last two decades at that maximum proportion of the historical variation. Maximum proportions of each ownership type are: 0.99 (Federal), 0.99 …
reforest	low	Increases annually by 10% of the historical variation over the first decade to 100%, then holds steady at 100% of the historical variation each year for the last two decades.
reforest	mod	Increases annually by 10% of first, second, and third decade targets, where those targets are a portion of the baseline viewable in the supplementary table reforestation_inputs_county.csv.
reforest	amb	Increases annually by 10% of first, second, and third decade targets, where those targets are a portion of the baseline viewable in the supplementary table reforestation_inputs_county.csv.
ACF	low	Increases annually by 10% of the baseline over the first decade to 100% of baseline, then drops back to 10% of the baseline annually for the last two decades.
ACF	mod	Increases annually by 5% of the baseline over the first decade to 50% of baseline, then holds steady at 50% of the baseline annually for the last two decades.
ACF	amb	Increases annually by 10% of the baseline over the first decade to 100% of baseline, then holds steady at 100% of the baseline annually for the last two decades.
rref	low	Increases annually by 10% of the historical variation over the first decade to 100% of historical variation, then holds steady at 100% of the historical variation annually for the last two decades.
rref	mod	Increases annually by 5% of the baseline over the first decade to 50% of baseline, then holds steady at 50% of the baseline annually for the last two decades.
rref	amb	Increases annually by twice the baseline minus 10% of the baseline over the first decade, then doubling that rate through the second decade, and doubling again through the third decade.
tide	low	Increases annually by the historical variation times the year number (1-10) over the first decade, then holds steady at the historical variation for the last two decades.
tide	mod	Increases annually by 20% of the baseline over first decade to 200% of baseline, then holds steady at 200% of the baseline annually for the last two decades.
tide	amb	Increases annually by 20% of the baseline over first decade to 200% of baseline, then annually increases to about 400% of the baseline over the second decade and to about 800% in the third decade.
grass	low	Increases annually by 10% of the historical variation over the first decade to 100%, then holds steady at 100% of the historical variation each year for the last two decades.
grass	mod	Increases annually by 5% of the baseline over the first decade to 50% of the baseline, then increases annually to reach 100% of the baseline over the last two decades.
grass	amb	Increases annually by 10% of the baseline over the first decade to 100% of baseline, then holds steady at 100% of the baseline annually for the last two decades.
cc	low	Increases annually by 4% of the baseline over the first decade to 40% of baseline, then holds steady at 40% of the baseline annually for the last two decades.
nt	low	Increases annually by 3% of the baseline over the first decade to 30% of baseline, then holds steady at 30% of the baseline annually for the last two decades.
nm	low	Increases annually over first decade to 50% of historical variation, then holds steady at 50% for the last two decades.
cc	mod	Increases annually by 15% of the baseline over first decade to 150% of baseline, then holds steady at 150% of the baseline annually for the last two decades.
nt	mod	Increases annually by 30% of the baesline over first decade to 300% of baseline, then holds steady at 300% of the baseline annually for the last two decades.
nm	mod	Increases annually over first decade to 10% of baseline over first decade, then increasing to reach 25% of the baseline by end of last two decades.
cc	amb	Increases annually to reach 50% of the maximum allowable implementation by end of the three decades.
nt	amb	Increases annually to reach 50% of the maximum allowable implementation by end of the three decades.
nm	amb	Increases annually by 4% of the baseline over the first decade to 40% of baseline, then holds steady at 40% of the baseline annually for the last two decades.
sage	low	Increases annually by 10% of the historical variation over the first decade to 100% of historical variation, then holds steady at 100% of the historical variation annually for the last two decades.
sage	mod	Holds at 10% of the baseline each year of the first decade, and then holds at 20% of the baseline each year of the last two decades.
sage	amb	Increases annually by 10% of the baseline over the first decade to 100% of baseline, then holds steady at 100% of the baseline annually for the last two decades.

## Sheet: S1_dictionary
Pathway Abbreviation	Pathway Name
ACF	avoided conversion of forests to urban and rural development
cc	cover crop
nt	no-till
nm	nutrient management
grass	restoration and avoided conversion of grassland
ifm	extended timber harvest
reforest	replanting forest after wildfire
rref	riparian reforestation
sage	avoided conversation of sagebrush-steppe to agricultural uses
tide	tidal wetland restoration
