# Supplementary material for: Leveraging the potential of nature to meet net zero greenhouse gas emissions in Washington State
Source: PeerJ. 2021 Jul 21;9:e11802. doi: 10.7717/peerj.11802 (PMC8308619; doi:10.7717/peerj.11802)
Supplement: Supplemental Information 3 — A data dictionary is included as a tab in this file. [file peerj-09-11802-s003.xlsx]

## Sheet: S3
Years	Mean_high	SD_high	Mean_low	SD_low	Mean_mod	SD_mod
Yr1to5	5.9729	1.19458	1.80586	0.361171	2.22161	0.444323
Yr6to10	7.83167	1.56633	0.776856	0.227606	2.73301	0.546603
Yr11to20	10.695	4.02508	1.22987	0.606116	4.41999	1.61139
Yr21to30	9.50488	5.42069	2.23954	1.05557	5.82302	2.5656

## Sheet: S3_dictionary
Column Descriptions
Name	Unit	Description
years	Range of years	Year of growth after replanting.
Mean_high	Metric Tons CO2e	Mean annual sequestration per hectare in of given year range following replanting after high severity wildfire.
SD_high	Metric Tons CO2e	Standard deviation of Mean_high
Mean_low	Metric Tons CO2e	Mean annual sequestration per hectare in of given year range following replanting after low severity wildfire.
SD_low	Metric Tons CO2e	Standard deviation of Mean_low
Mean_mod	Metric Tons CO2e	Mean annual sequestration per hectare in of given year range following replanting after moderate severity wildfire.
SD_mod	Metric Tons CO2e	Standard deviation of Mean_moderate
Note: this S3 file is the same as the reforest_groups.csv used for preprocessing and included with the R code files.
