# Supplementary material for: Leveraging the potential of nature to meet net zero greenhouse gas emissions in Washington State
Source: PeerJ. 2021 Jul 21;9:e11802. doi: 10.7717/peerj.11802 (PMC8308619; doi:10.7717/peerj.11802)
Supplement: Supplemental Information 4 — A data dictionary is included as a tab in this file. [file peerj-09-11802-s004.xlsx]

## Sheet: Supplemental Table S4
Scenario	ScenName	Year	Median	CI_High	CI_Low
1	Lim	1	-0.376524	-0.36273	-0.389682
1	Lim	2	-0.755557	-0.727682	-0.783125
1	Lim	3	-1.13847	-1.0954	-1.17832
1	Lim	4	-1.52585	-1.4712	-1.58151
1	Lim	5	-1.91392	-1.84015	-1.98005
1	Lim	6	-2.3052	-2.22425	-2.38745
1	Lim	7	-2.70043	-2.60389	-2.79946
1	Lim	8	-3.0961	-2.99043	-3.21325
1	Lim	9	-3.49835	-3.37149	-3.62064
1	Lim	10	-3.90262	-3.75486	-4.0375
1	Lim	11	-3.9273	-3.77903	-4.06964
1	Lim	12	-3.95642	-3.81104	-4.10247
1	Lim	13	-3.98221	-3.84087	-4.1248
1	Lim	14	-4.01096	-3.86466	-4.15474
1	Lim	15	-4.03479	-3.89211	-4.17686
1	Lim	16	-4.04831	-3.90608	-4.20001
1	Lim	17	-4.07999	-3.93388	-4.22739
1	Lim	18	-4.10221	-3.96727	-4.24577
1	Lim	19	-4.12	-3.98524	-4.26345
1	Lim	20	-4.14581	-4.00838	-4.28392
1	Lim	21	-4.16704	-4.02309	-4.30606
1	Lim	22	-4.18658	-4.026	-4.32981
1	Lim	23	-4.20802	-4.05545	-4.35116
1	Lim	24	-4.21796	-4.07715	-4.3553
1	Lim	25	-4.2375	-4.08508	-4.3852
1	Lim	26	-4.25045	-4.11007	-4.39269
1	Lim	27	-4.26402	-4.11132	-4.41676
1	Lim	28	-4.27371	-4.11895	-4.42289
1	Lim	29	-4.28786	-4.13697	-4.43456
1	Lim	30	-4.30138	-4.15415	-4.45476
1	Lim	31	-4.31507	-4.1682	-4.4557
2	Amb	1	-1.96129	-1.89847	-2.02903
2	Amb	2	-2.49821	-2.4127	-2.59094
2	Amb	3	-3.09213	-2.99031	-3.1977
2	Amb	4	-3.75717	-3.62122	-3.88659
2	Amb	5	-4.43459	-4.27632	-4.59297
2	Amb	6	-5.03341	-4.86556	-5.21863
2	Amb	7	-5.55173	-5.36019	-5.74062
2	Amb	8	-6.02058	-5.81913	-6.23982
2	Amb	9	-6.47024	-6.24672	-6.68345
2	Amb	10	-6.83562	-6.6021	-7.05472
2	Amb	11	-7.1848	-6.95633	-7.43331
2	Amb	12	-7.26653	-7.01758	-7.49751
2	Amb	13	-7.3701	-7.12783	-7.58523
2	Amb	14	-7.43566	-7.21489	-7.67881
2	Amb	15	-7.51602	-7.27709	-7.76398
2	Amb	16	-7.61161	-7.3468	-7.8521
2	Amb	17	-7.6918	-7.45	-7.9436
2	Amb	18	-7.77025	-7.52774	-8.00845
2	Amb	19	-7.87698	-7.62288	-8.10631
2	Amb	20	-7.93308	-7.68989	-8.18039
2	Amb	21	-8.02982	-7.76782	-8.28172
2	Amb	22	-8.10739	-7.86814	-8.36874
2	Amb	23	-8.19618	-7.92963	-8.43601
2	Amb	24	-8.27513	-8.00304	-8.55686
2	Amb	25	-8.35134	-8.0762	-8.61621
2	Amb	26	-8.43576	-8.1564	-8.68953
2	Amb	27	-8.51029	-8.25835	-8.78104
2	Amb	28	-8.60431	-8.33277	-8.85543
2	Amb	29	-8.67396	-8.41534	-8.93983
2	Amb	30	-8.76127	-8.48514	-9.00852
2	Amb	31	-8.84223	-8.56395	-9.09875
3	Mod	1	-0.39742	-0.381751	-0.411412
3	Mod	2	-0.795599	-0.765895	-0.826494
3	Mod	3	-1.19731	-1.15353	-1.24084
3	Mod	4	-1.60159	-1.54075	-1.66207
3	Mod	5	-2.01271	-1.93276	-2.09191
3	Mod	6	-2.4211	-2.33438	-2.51092
3	Mod	7	-2.83494	-2.7366	-2.93838
3	Mod	8	-3.25807	-3.1356	-3.37125
3	Mod	9	-3.68234	-3.56081	-3.80968
3	Mod	10	-4.10514	-3.95805	-4.25022
3	Mod	11	-4.23204	-4.06951	-4.38794
3	Mod	12	-4.28241	-4.13148	-4.43949
3	Mod	13	-4.32831	-4.16556	-4.48552
3	Mod	14	-4.37824	-4.21312	-4.53807
3	Mod	15	-4.42181	-4.27494	-4.58655
3	Mod	16	-4.48116	-4.31653	-4.63742
3	Mod	17	-4.52148	-4.35959	-4.68097
3	Mod	18	-4.57115	-4.41465	-4.72657
3	Mod	19	-4.62121	-4.44749	-4.77091
3	Mod	20	-4.66078	-4.50209	-4.82895
3	Mod	21	-4.70572	-4.54648	-4.86511
3	Mod	22	-4.75154	-4.59333	-4.90579
3	Mod	23	-4.78715	-4.62904	-4.95047
3	Mod	24	-4.83175	-4.66238	-4.99574
3	Mod	25	-4.87319	-4.69184	-5.03844
3	Mod	26	-4.9095	-4.75514	-5.08893
3	Mod	27	-4.94493	-4.78467	-5.10891
3	Mod	28	-4.98532	-4.8213	-5.14276
3	Mod	29	-5.01999	-4.85113	-5.19264
3	Mod	30	-5.05336	-4.88519	-5.22816
3	Mod	31	-5.08897	-4.915	-5.25125

## Sheet: S4-S8_dictionary
FileName	Description
Supplemental Table S4.csv	Evaluated results of Monte Carlo runs on each scenario in each year, statewide.
Supplemental Table S5.csv	Evaluated results of Monte Carlo runs on each pathway activity per scenario in each year, statewide.
Supplemental Table S6.csv	Evaluated results of Monte Carlo runs on each scenario in each year, per county.
Supplemental Table S7.csv	Evaluated results of Monte Carlo runs on each pathway subactivity per scenario in each year, per county.
Supplemental Table S8.csv	Evaluated results of Monte Carlo runs on each pathway activity per scenario in each year, per county.
Columns	Description	Values or Units
Scenario	Numeric identifier for each scenario.	2=Ambitious, 3=Moderate, 1=Limited
ScenName	Name of each scenario	Amb=Ambitious, Mod=Moderate, Lim=Limited
County	Name of each county (39 counties total)	Adams, Asotin, Benton, Chelan, Clallam, Clark, Columbia, Cowlitz, Douglas, Ferry, Franklin, Garfield, Grant, Grays Harbor, Island, Jefferson, King, Kitsap, Kittitas, Klickitat, Lewis, Lincoln, Mason, Okanogan, Pacific, Pend Oreille, Pierce, San Juan, Skagit, Skamania, Snohomish, Spokane, Stevens, Thurston, Wahkiakum, Walla Walla, Whatcom, Whitman, Yakima
Activity	NCS pathway, where some are a combination of subactivities (defined below)	ACF=avoided conversion of forest, ag=agricultural activities, grass=restoration and avoided conversion of grasslands, ifm=improved forest management (aka extended timber harvest rotations), reforest=replanting after wildfires, rref=riparian reforestation, sage=restoration and avoided conversion of sagebrush-steppe, tide=tidal wetland restoration
Subactivity	Specific NCS activity that is equivalent to or combines with other subactivities to be a NCS pathway	(see Lines 19-37 below)
Year	Consecutive years that the pathway is implemented per each scenario	Range: 1-31 (e.g. representing hypothetical years 2020-2050)
Median	Median of Monte Carlo results in MMT CO2e per year.	Units: MMT CO2e yr-1
CI_High	Confidence Interval at 95th percentile value of Monte Carlo results.	Units: MMT CO2e yr-1
CI_Low	Confidence Interval at 5th percentile value of Monte Carlo results.	Units: MMT CO2e yr-1
Subactivity (Line 13 above)	Activity (Line 12 above)	Description
1f2rur	ACF	avoided conversion of forests to rural development
2f2urb	ACF	avoided conversion of forests to urban development
1cc	ag	cover crop
2nt	ag	no-till
3nm	ag	nutrient management
1grass	grass	restoration and avoided conversion of grassland
1feder	ifm	extended timber harvest on federal lands
2other	ifm	extended timber harvest on other (e.g. nature preserves, local government) lands
3priva	ifm	extended timber harvest on private lands (industrial and non-industrial)
4state	ifm	extended timber harvest on state lands
5prseq	ifm	extended timber harvest on private lands, with additional sequestration by avoiding clearcutting
1intensL	reforest	replanting forest after low intensity wildfire
2intensM	reforest	replanting forest after medium intensity wildfire
3intensH	reforest	replanting forest after high intensity wildfire
1rref	rref	riparian reforestation
1s2ag	sage	restoration of sagebrush-steppe from agricultural uses
2ag2s	sage	avoided conversation of sagebrush-steppe to agricultural uses
1tide	tide	tidal wetland restoration
