# Supplementary material for: Leveraging the potential of nature to meet net zero greenhouse gas emissions in Washington State
Source: PeerJ. 2021 Jul 21;9:e11802. doi: 10.7717/peerj.11802 (PMC8308619; doi:10.7717/peerj.11802)
Supplement: Supplemental Information 6 — A data dictionary is included as a tab in this file. [file peerj-09-11802-s006.xlsx]

## Sheet: Supplemental Table S6
Scenario	ScenName	County	Year	Median	CI_High	CI_Low
1	Lim	Adams	1	-0.000184	-0.0001227	-0.0002422
1	Lim	Adams	2	-0.000363	-0.0002479	-0.000474
1	Lim	Adams	3	-0.0005343	-0.0003682	-0.0007255
1	Lim	Adams	4	-0.000737	-0.0005009	-0.0009697
1	Lim	Adams	5	-0.0009079	-0.0006301	-0.0012111
1	Lim	Adams	6	-0.0010761	-0.0007182	-0.0014355
1	Lim	Adams	7	-0.0013046	-0.0008598	-0.0017063
1	Lim	Adams	8	-0.001498	-0.0010056	-0.0019461
1	Lim	Adams	9	-0.0016575	-0.0011135	-0.0021888
1	Lim	Adams	10	-0.0018078	-0.0012381	-0.0024247
1	Lim	Adams	11	-0.0018678	-0.0012389	-0.0024434
1	Lim	Adams	12	-0.0018426	-0.0012512	-0.0024265
1	Lim	Adams	13	-0.0018275	-0.001285	-0.0024021
1	Lim	Adams	14	-0.0018384	-0.0012444	-0.0024381
1	Lim	Adams	15	-0.0018259	-0.0012247	-0.0024284
1	Lim	Adams	16	-0.0018268	-0.0012587	-0.0024283
1	Lim	Adams	17	-0.0018182	-0.0012577	-0.0024222
1	Lim	Adams	18	-0.0018628	-0.0012401	-0.0024254
1	Lim	Adams	19	-0.0018266	-0.0012792	-0.002431
1	Lim	Adams	20	-0.001839	-0.0012511	-0.0024474
1	Lim	Adams	21	-0.0018288	-0.00126	-0.0024205
1	Lim	Adams	22	-0.001869	-0.0012562	-0.0024468
1	Lim	Adams	23	-0.001848	-0.0012392	-0.0024176
1	Lim	Adams	24	-0.001834	-0.0012337	-0.0024541
1	Lim	Adams	25	-0.001873	-0.0012699	-0.0024512
1	Lim	Adams	26	-0.0018718	-0.0012535	-0.002454
1	Lim	Adams	27	-0.0018786	-0.0012831	-0.0024301
1	Lim	Adams	28	-0.0018444	-0.0012837	-0.0024722
1	Lim	Adams	29	-0.0018547	-0.0012535	-0.0024596
1	Lim	Adams	30	-0.0018528	-0.0012605	-0.0024515
1	Lim	Adams	31	-0.0018969	-0.0012797	-0.0024513
1	Lim	Asotin	1	-0.0011063	-0.0009508	-0.0012556
1	Lim	Asotin	2	-0.0022489	-0.0019469	-0.0025327
1	Lim	Asotin	3	-0.0033835	-0.002945	-0.0038192
1	Lim	Asotin	4	-0.0045237	-0.0039263	-0.0051145
1	Lim	Asotin	5	-0.0057252	-0.0049417	-0.0064951
1	Lim	Asotin	6	-0.0069193	-0.0059785	-0.0078266
1	Lim	Asotin	7	-0.0081157	-0.0070145	-0.0092656
1	Lim	Asotin	8	-0.0093655	-0.0080508	-0.0106391
1	Lim	Asotin	9	-0.0105994	-0.0091707	-0.0120203
1	Lim	Asotin	10	-0.0117633	-0.0101411	-0.0134591
1	Lim	Asotin	11	-0.011933	-0.0102019	-0.0137408
1	Lim	Asotin	12	-0.0120309	-0.0102992	-0.0137545
1	Lim	Asotin	13	-0.0121433	-0.0102902	-0.0139842
1	Lim	Asotin	14	-0.0123322	-0.0104209	-0.0142757
1	Lim	Asotin	15	-0.0125521	-0.010511	-0.0144587
1	Lim	Asotin	16	-0.0125201	-0.0105053	-0.0144649
1	Lim	Asotin	17	-0.0126088	-0.0105632	-0.014807
1	Lim	Asotin	18	-0.0127184	-0.0106333	-0.0149104
1	Lim	Asotin	19	-0.0127971	-0.0104895	-0.0150894
1	Lim	Asotin	20	-0.0129058	-0.0105734	-0.0152962
1	Lim	Asotin	21	-0.0130059	-0.0105454	-0.0154207
1	Lim	Asotin	22	-0.0130174	-0.0107535	-0.0156541
1	Lim	Asotin	23	-0.0130797	-0.0105465	-0.0156716
1	Lim	Asotin	24	-0.0132741	-0.0106661	-0.0157687
1	Lim	Asotin	25	-0.0134303	-0.0107877	-0.0159666
1	Lim	Asotin	26	-0.0133531	-0.0108806	-0.0161014
1	Lim	Asotin	27	-0.013544	-0.0111162	-0.0161549
1	Lim	Asotin	28	-0.0135219	-0.0106815	-0.0162483
1	Lim	Asotin	29	-0.0136469	-0.0108891	-0.0164793
1	Lim	Asotin	30	-0.0136957	-0.0110576	-0.0164636
1	Lim	Asotin	31	-0.0137664	-0.010916	-0.0168094
1	Lim	Benton	1	-0.0009099	-0.0005881	-0.0012258
1	Lim	Benton	2	-0.0018299	-0.0011894	-0.0024633
1	Lim	Benton	3	-0.0027376	-0.0017793	-0.0037489
1	Lim	Benton	4	-0.0035915	-0.0023553	-0.0049874
1	Lim	Benton	5	-0.0046374	-0.0030449	-0.0061323
1	Lim	Benton	6	-0.0055248	-0.0036425	-0.0074571
1	Lim	Benton	7	-0.0064153	-0.0041491	-0.0087063
1	Lim	Benton	8	-0.0072773	-0.0045659	-0.0099881
1	Lim	Benton	9	-0.0084315	-0.0054731	-0.0113593
1	Lim	Benton	10	-0.0092474	-0.0060427	-0.0124391
1	Lim	Benton	11	-0.009217	-0.0059969	-0.0123116
1	Lim	Benton	12	-0.0093317	-0.0060396	-0.0125863
1	Lim	Benton	13	-0.0091198	-0.0059752	-0.0126283
1	Lim	Benton	14	-0.0094515	-0.006315	-0.0124113
1	Lim	Benton	15	-0.0093559	-0.0062501	-0.0126703
1	Lim	Benton	16	-0.0094213	-0.0060636	-0.012635
1	Lim	Benton	17	-0.0094309	-0.0063912	-0.0126688
1	Lim	Benton	18	-0.009557	-0.0062977	-0.0125949
1	Lim	Benton	19	-0.0095793	-0.0063371	-0.0127879
1	Lim	Benton	20	-0.0097079	-0.006351	-0.0129001
1	Lim	Benton	21	-0.0096195	-0.0064434	-0.0127121
1	Lim	Benton	22	-0.0097149	-0.0064202	-0.0128184
1	Lim	Benton	23	-0.009775	-0.006409	-0.0130493
1	Lim	Benton	24	-0.0097564	-0.0064341	-0.0128723
1	Lim	Benton	25	-0.0098351	-0.006616	-0.0129678
1	Lim	Benton	26	-0.0098167	-0.0065306	-0.012858
1	Lim	Benton	27	-0.0098011	-0.0065458	-0.012878
1	Lim	Benton	28	-0.0097731	-0.0066535	-0.0132073
1	Lim	Benton	29	-0.0099797	-0.0065549	-0.0129507
1	Lim	Benton	30	-0.0098804	-0.0065764	-0.0132094
1	Lim	Benton	31	-0.0099328	-0.0066982	-0.013184
1	Lim	Chelan	1	-0.0005799	-0.0002914	-0.0015803
1	Lim	Chelan	2	-0.0014006	-0.0007557	-0.0024154
1	Lim	Chelan	3	-0.002048	-0.0013829	-0.0031064
1	Lim	Chelan	4	-0.0028153	-0.0020093	-0.0036993
1	Lim	Chelan	5	-0.00345	-0.0025217	-0.0045291
1	Lim	Chelan	6	-0.0039483	-0.0029181	-0.0050316
1	Lim	Chelan	7	-0.0044701	-0.0033427	-0.0054948
1	Lim	Chelan	8	-0.0049083	-0.0037053	-0.0059885
1	Lim	Chelan	9	-0.0053474	-0.0042143	-0.0065357
1	Lim	Chelan	10	-0.0054293	-0.0043159	-0.006728
1	Lim	Chelan	11	-0.0054024	-0.0041441	-0.0066458
1	Lim	Chelan	12	-0.0053415	-0.004035	-0.0066021
1	Lim	Chelan	13	-0.0052548	-0.00395	-0.0064555
1	Lim	Chelan	14	-0.0051817	-0.0038153	-0.0064191
1	Lim	Chelan	15	-0.0052716	-0.0039583	-0.0065215
1	Lim	Chelan	16	-0.0056537	-0.0041572	-0.0072027
1	Lim	Chelan	17	-0.0060095	-0.0046767	-0.0075885
1	Lim	Chelan	18	-0.0064313	-0.0051186	-0.0080111
1	Lim	Chelan	19	-0.0068307	-0.0055553	-0.0084288
1	Lim	Chelan	20	-0.0071732	-0.0058081	-0.0088777
1	Lim	Chelan	21	-0.0075462	-0.0060656	-0.0093152
1	Lim	Chelan	22	-0.0078938	-0.0064601	-0.0096114
1	Lim	Chelan	23	-0.0081705	-0.0068232	-0.0100098
1	Lim	Chelan	24	-0.0084756	-0.0069973	-0.0101201
1	Lim	Chelan	25	-0.0084926	-0.0070993	-0.0103238
1	Lim	Chelan	26	-0.0087403	-0.0072923	-0.0105086
1	Lim	Chelan	27	-0.0089456	-0.0075484	-0.0106285
1	Lim	Chelan	28	-0.0090309	-0.0076845	-0.0108365
1	Lim	Chelan	29	-0.009166	-0.0077587	-0.0109418
1	Lim	Chelan	30	-0.0093535	-0.0080277	-0.0111202
1	Lim	Chelan	31	-0.0095249	-0.0080551	-0.0111342
1	Lim	Clallam	1	-0.0249955	-0.020438	-0.0295041
1	Lim	Clallam	2	-0.0506971	-0.0406972	-0.0597447
1	Lim	Clallam	3	-0.0756419	-0.0619366	-0.0903948
1	Lim	Clallam	4	-0.102193	-0.0844227	-0.120134
1	Lim	Clallam	5	-0.128015	-0.104289	-0.150339
1	Lim	Clallam	6	-0.155125	-0.129318	-0.181302
1	Lim	Clallam	7	-0.179399	-0.148432	-0.211553
1	Lim	Clallam	8	-0.206407	-0.172102	-0.244555
1	Lim	Clallam	9	-0.234409	-0.194767	-0.277176
1	Lim	Clallam	10	-0.26096	-0.214983	-0.308948
1	Lim	Clallam	11	-0.264356	-0.215165	-0.310175
1	Lim	Clallam	12	-0.267809	-0.219822	-0.313805
1	Lim	Clallam	13	-0.269024	-0.221614	-0.316305
1	Lim	Clallam	14	-0.272302	-0.226558	-0.321701
1	Lim	Clallam	15	-0.274107	-0.226379	-0.322826
1	Lim	Clallam	16	-0.276864	-0.230579	-0.323114
1	Lim	Clallam	17	-0.278033	-0.230131	-0.324018
1	Lim	Clallam	18	-0.278826	-0.233814	-0.327598
1	Lim	Clallam	19	-0.280616	-0.235014	-0.330589
1	Lim	Clallam	20	-0.285158	-0.234052	-0.329707
1	Lim	Clallam	21	-0.284203	-0.235105	-0.332258
1	Lim	Clallam	22	-0.286897	-0.236659	-0.331632
1	Lim	Clallam	23	-0.287548	-0.239053	-0.336506
1	Lim	Clallam	24	-0.288714	-0.242802	-0.335186
1	Lim	Clallam	25	-0.288038	-0.241736	-0.33611
1	Lim	Clallam	26	-0.289826	-0.242267	-0.339007
1	Lim	Clallam	27	-0.295239	-0.245776	-0.34248
1	Lim	Clallam	28	-0.291708	-0.24463	-0.340254
1	Lim	Clallam	29	-0.293605	-0.242606	-0.341594
1	Lim	Clallam	30	-0.294441	-0.244955	-0.346245
1	Lim	Clallam	31	-0.296538	-0.250949	-0.34078
1	Lim	Clark	1	-0.0132926	-0.0117866	-0.014768
1	Lim	Clark	2	-0.0267205	-0.023531	-0.0299272
1	Lim	Clark	3	-0.0404456	-0.0360738	-0.0449213
1	Lim	Clark	4	-0.0539777	-0.0482151	-0.0600125
1	Lim	Clark	5	-0.0681048	-0.0605027	-0.0752604
1	Lim	Clark	6	-0.0817227	-0.0729228	-0.0902082
1	Lim	Clark	7	-0.0957806	-0.0847655	-0.107114
1	Lim	Clark	8	-0.109415	-0.0965839	-0.121454
1	Lim	Clark	9	-0.124413	-0.11035	-0.137278
1	Lim	Clark	10	-0.138521	-0.122766	-0.153097
1	Lim	Clark	11	-0.1386	-0.123883	-0.153206
1	Lim	Clark	12	-0.139966	-0.125084	-0.155177
1	Lim	Clark	13	-0.13999	-0.125949	-0.155286
1	Lim	Clark	14	-0.142242	-0.127581	-0.157464
1	Lim	Clark	15	-0.143358	-0.127681	-0.158556
1	Lim	Clark	16	-0.142973	-0.128102	-0.158634
1	Lim	Clark	17	-0.143471	-0.128197	-0.159705
1	Lim	Clark	18	-0.14475	-0.129202	-0.160644
1	Lim	Clark	19	-0.145685	-0.130847	-0.16048
1	Lim	Clark	20	-0.146028	-0.129991	-0.161948
1	Lim	Clark	21	-0.146646	-0.130436	-0.162258
1	Lim	Clark	22	-0.147431	-0.131314	-0.164748
1	Lim	Clark	23	-0.148562	-0.132401	-0.164603
1	Lim	Clark	24	-0.148388	-0.133472	-0.165356
1	Lim	Clark	25	-0.149324	-0.133811	-0.165071
1	Lim	Clark	26	-0.150331	-0.134556	-0.166416
1	Lim	Clark	27	-0.150099	-0.134023	-0.167201
1	Lim	Clark	28	-0.150494	-0.133698	-0.167017
1	Lim	Clark	29	-0.150604	-0.135258	-0.166085
1	Lim	Clark	30	-0.151521	-0.134702	-0.168369
1	Lim	Clark	31	-0.151952	-0.13437	-0.168832
1	Lim	Columbia	1	-0.0037865	-0.0031852	-0.0045033
1	Lim	Columbia	2	-0.0076404	-0.0065584	-0.0088321
1	Lim	Columbia	3	-0.0114757	-0.0099305	-0.0130722
1	Lim	Columbia	4	-0.015342	-0.013466	-0.0174211
1	Lim	Columbia	5	-0.0192881	-0.0170277	-0.0217863
1	Lim	Columbia	6	-0.0234457	-0.0204671	-0.026232
1	Lim	Columbia	7	-0.0272309	-0.0239414	-0.03083
1	Lim	Columbia	8	-0.0316232	-0.0272904	-0.0355175
1	Lim	Columbia	9	-0.035482	-0.030922	-0.0402451
1	Lim	Columbia	10	-0.0392832	-0.0343671	-0.0444309
1	Lim	Columbia	11	-0.0400381	-0.0343079	-0.0452024
1	Lim	Columbia	12	-0.0404181	-0.0350432	-0.0460999
1	Lim	Columbia	13	-0.0410641	-0.0347536	-0.0471846
1	Lim	Columbia	14	-0.0413668	-0.0349505	-0.047571
1	Lim	Columbia	15	-0.0420233	-0.0357732	-0.0484893
1	Lim	Columbia	16	-0.0430655	-0.0360083	-0.0495521
1	Lim	Columbia	17	-0.0442696	-0.0374245	-0.0514525
1	Lim	Columbia	18	-0.0453966	-0.0382408	-0.0527903
1	Lim	Columbia	19	-0.0467101	-0.0387448	-0.0537327
1	Lim	Columbia	20	-0.0472671	-0.039719	-0.0553228
1	Lim	Columbia	21	-0.0479304	-0.0402585	-0.0555546
1	Lim	Columbia	22	-0.0490081	-0.0411367	-0.0571893
1	Lim	Columbia	23	-0.0501572	-0.0421223	-0.0582716
1	Lim	Columbia	24	-0.0507809	-0.0421095	-0.0586268
1	Lim	Columbia	25	-0.051736	-0.0434289	-0.0600369
1	Lim	Columbia	26	-0.0521837	-0.0428274	-0.0610501
1	Lim	Columbia	27	-0.0524828	-0.0430752	-0.0615589
1	Lim	Columbia	28	-0.0525284	-0.0433183	-0.061904
1	Lim	Columbia	29	-0.05382	-0.043757	-0.0633224
1	Lim	Columbia	30	-0.0532788	-0.0436761	-0.063437
1	Lim	Columbia	31	-0.0539225	-0.0435086	-0.0637732
1	Lim	Cowlitz	1	-0.0198465	-0.0166232	-0.0230136
1	Lim	Cowlitz	2	-0.0396503	-0.0329203	-0.0461045
1	Lim	Cowlitz	3	-0.060211	-0.0501481	-0.069791
1	Lim	Cowlitz	4	-0.0807991	-0.0672179	-0.0939641
1	Lim	Cowlitz	5	-0.101958	-0.0858175	-0.118132
1	Lim	Cowlitz	6	-0.121688	-0.103485	-0.142747
1	Lim	Cowlitz	7	-0.142375	-0.120989	-0.166044
1	Lim	Cowlitz	8	-0.162635	-0.137426	-0.189988
1	Lim	Cowlitz	9	-0.184994	-0.155695	-0.210809
1	Lim	Cowlitz	10	-0.205613	-0.174196	-0.236935
1	Lim	Cowlitz	11	-0.209142	-0.177716	-0.241006
1	Lim	Cowlitz	12	-0.209526	-0.17536	-0.244021
1	Lim	Cowlitz	13	-0.212453	-0.179487	-0.243513
1	Lim	Cowlitz	14	-0.213527	-0.178891	-0.246904
1	Lim	Cowlitz	15	-0.215144	-0.181842	-0.248474
1	Lim	Cowlitz	16	-0.215995	-0.182755	-0.248495
1	Lim	Cowlitz	17	-0.216688	-0.185206	-0.250291
1	Lim	Cowlitz	18	-0.217893	-0.183971	-0.251446
1	Lim	Cowlitz	19	-0.220428	-0.185232	-0.251542
1	Lim	Cowlitz	20	-0.221502	-0.189	-0.2538
1	Lim	Cowlitz	21	-0.223169	-0.189286	-0.255605
1	Lim	Cowlitz	22	-0.224113	-0.188187	-0.256179
1	Lim	Cowlitz	23	-0.225788	-0.19218	-0.258678
1	Lim	Cowlitz	24	-0.225891	-0.193747	-0.259104
1	Lim	Cowlitz	25	-0.226108	-0.193722	-0.260574
1	Lim	Cowlitz	26	-0.228689	-0.19134	-0.262801
1	Lim	Cowlitz	27	-0.227808	-0.191944	-0.25958
1	Lim	Cowlitz	28	-0.227618	-0.194203	-0.260282
1	Lim	Cowlitz	29	-0.22961	-0.195217	-0.263214
1	Lim	Cowlitz	30	-0.230983	-0.196124	-0.265033
1	Lim	Cowlitz	31	-0.229883	-0.196682	-0.264862
1	Lim	Douglas	1	-0.0004589	-0.0002938	-0.0006141
1	Lim	Douglas	2	-0.0009213	-0.0006062	-0.0012623
1	Lim	Douglas	3	-0.0014307	-0.0009433	-0.0019348
1	Lim	Douglas	4	-0.0019389	-0.0013087	-0.0026227
1	Lim	Douglas	5	-0.0025614	-0.0016633	-0.0034331
1	Lim	Douglas	6	-0.0031294	-0.0020844	-0.0041602
1	Lim	Douglas	7	-0.0036421	-0.0024397	-0.0048975
1	Lim	Douglas	8	-0.004378	-0.0028429	-0.0058466
1	Lim	Douglas	9	-0.0048607	-0.0032882	-0.0066676
1	Lim	Douglas	10	-0.0056418	-0.0037249	-0.0076739
1	Lim	Douglas	11	-0.0059244	-0.0038509	-0.0079673
1	Lim	Douglas	12	-0.0060281	-0.0039005	-0.0083132
1	Lim	Douglas	13	-0.006269	-0.0039946	-0.0085206
1	Lim	Douglas	14	-0.0063804	-0.003961	-0.0089419
1	Lim	Douglas	15	-0.0066613	-0.004139	-0.0092417
1	Lim	Douglas	16	-0.0069371	-0.0042491	-0.0096458
1	Lim	Douglas	17	-0.0070156	-0.0044005	-0.0095311
1	Lim	Douglas	18	-0.0071312	-0.0043555	-0.0099775
1	Lim	Douglas	19	-0.0073167	-0.0044463	-0.0102659
1	Lim	Douglas	20	-0.0075648	-0.0045625	-0.010529
1	Lim	Douglas	21	-0.0076688	-0.0045619	-0.0106127
1	Lim	Douglas	22	-0.0078539	-0.0044163	-0.0112815
1	Lim	Douglas	23	-0.0079942	-0.0048807	-0.0112072
1	Lim	Douglas	24	-0.0080134	-0.0046972	-0.0113021
1	Lim	Douglas	25	-0.0081673	-0.0045626	-0.0115878
1	Lim	Douglas	26	-0.0082906	-0.0050227	-0.0117633
1	Lim	Douglas	27	-0.0084433	-0.0046725	-0.0118923
1	Lim	Douglas	28	-0.0082791	-0.0048114	-0.0120768
1	Lim	Douglas	29	-0.0086905	-0.0048133	-0.0123815
1	Lim	Douglas	30	-0.0086877	-0.0049378	-0.0126651
1	Lim	Douglas	31	-0.008797	-0.0052071	-0.012508
1	Lim	Ferry	1	-0.0001385	-7.81e-05	-0.0002387
1	Lim	Ferry	2	-0.0002895	-0.0001714	-0.0004221
1	Lim	Ferry	3	-0.0004327	-0.0002869	-0.0006113
1	Lim	Ferry	4	-0.0005752	-0.0003897	-0.0008038
1	Lim	Ferry	5	-0.0007163	-0.0004863	-0.0009692
1	Lim	Ferry	6	-0.0008453	-0.000565	-0.0011593
1	Lim	Ferry	7	-0.0009807	-0.0006553	-0.0013046
1	Lim	Ferry	8	-0.0011084	-0.0007182	-0.0015188
1	Lim	Ferry	9	-0.0012028	-0.0008188	-0.0016333
1	Lim	Ferry	10	-0.0013342	-0.0008617	-0.0018125
1	Lim	Ferry	11	-0.0013215	-0.0008731	-0.0017605
1	Lim	Ferry	12	-0.0013111	-0.0008785	-0.0018031
1	Lim	Ferry	13	-0.0013164	-0.0008703	-0.0017745
1	Lim	Ferry	14	-0.0013309	-0.0008427	-0.0017942
1	Lim	Ferry	15	-0.0012955	-0.0008391	-0.0018094
1	Lim	Ferry	16	-0.0013663	-0.0008793	-0.0018404
1	Lim	Ferry	17	-0.0014081	-0.0009337	-0.0018818
1	Lim	Ferry	18	-0.001448	-0.000977	-0.0019699
1	Lim	Ferry	19	-0.0014801	-0.0010138	-0.0019631
1	Lim	Ferry	20	-0.0015088	-0.0010515	-0.0019729
1	Lim	Ferry	21	-0.0015627	-0.0011186	-0.0020196
1	Lim	Ferry	22	-0.0015916	-0.0011139	-0.0020789
1	Lim	Ferry	23	-0.0016398	-0.0011688	-0.0021267
1	Lim	Ferry	24	-0.0016478	-0.0012016	-0.0021221
1	Lim	Ferry	25	-0.0016671	-0.0012112	-0.0021544
1	Lim	Ferry	26	-0.0016905	-0.0011928	-0.0021848
1	Lim	Ferry	27	-0.0017159	-0.0012365	-0.0021898
1	Lim	Ferry	28	-0.0017275	-0.0012312	-0.0022088
1	Lim	Ferry	29	-0.0017512	-0.0012762	-0.002195
1	Lim	Ferry	30	-0.0017449	-0.0012768	-0.0022109
1	Lim	Ferry	31	-0.0017745	-0.0013092	-0.0022713
1	Lim	Franklin	1	-0.0011791	-0.0008339	-0.0015324
1	Lim	Franklin	2	-0.0023543	-0.0016819	-0.0030578
1	Lim	Franklin	3	-0.0035043	-0.0025317	-0.0045627
1	Lim	Franklin	4	-0.0047032	-0.0033638	-0.0061022
1	Lim	Franklin	5	-0.0058531	-0.0041933	-0.0076403
1	Lim	Franklin	6	-0.0071537	-0.0051542	-0.0091344
1	Lim	Franklin	7	-0.008317	-0.0059734	-0.0108295
1	Lim	Franklin	8	-0.0094163	-0.0067587	-0.012197
1	Lim	Franklin	9	-0.0104485	-0.0075449	-0.0137939
1	Lim	Franklin	10	-0.0118128	-0.008371	-0.0153735
1	Lim	Franklin	11	-0.0118392	-0.0083617	-0.0151003
1	Lim	Franklin	12	-0.0119932	-0.008469	-0.0153843
1	Lim	Franklin	13	-0.0118244	-0.0085518	-0.0153384
1	Lim	Franklin	14	-0.0120521	-0.0084761	-0.0154279
1	Lim	Franklin	15	-0.0121644	-0.0085332	-0.0153746
1	Lim	Franklin	16	-0.0119088	-0.0086636	-0.0155218
1	Lim	Franklin	17	-0.0120828	-0.0084718	-0.0154381
1	Lim	Franklin	18	-0.012073	-0.0086741	-0.0154908
1	Lim	Franklin	19	-0.0119954	-0.0087522	-0.0155412
1	Lim	Franklin	20	-0.0120537	-0.008643	-0.0154934
1	Lim	Franklin	21	-0.0120618	-0.0087206	-0.0157303
1	Lim	Franklin	22	-0.011951	-0.0087371	-0.0155178
1	Lim	Franklin	23	-0.0121003	-0.0086119	-0.0155693
1	Lim	Franklin	24	-0.0120845	-0.0088084	-0.0156212
1	Lim	Franklin	25	-0.0123282	-0.0086913	-0.0157482
1	Lim	Franklin	26	-0.0121045	-0.0087553	-0.0154806
1	Lim	Franklin	27	-0.0120896	-0.0085841	-0.0156562
1	Lim	Franklin	28	-0.0122026	-0.0088372	-0.0157022
1	Lim	Franklin	29	-0.0123076	-0.0088853	-0.0156701
1	Lim	Franklin	30	-0.0122132	-0.0088151	-0.0158039
1	Lim	Franklin	31	-0.0123601	-0.0089138	-0.0156841
1	Lim	Garfield	1	-0.0021532	-0.0016841	-0.0029213
1	Lim	Garfield	2	-0.0044033	-0.0034631	-0.0054105
1	Lim	Garfield	3	-0.0066863	-0.0053753	-0.0079488
1	Lim	Garfield	4	-0.0089382	-0.0072949	-0.0106617
1	Lim	Garfield	5	-0.0112012	-0.0091824	-0.0131015
1	Lim	Garfield	6	-0.013604	-0.0113201	-0.0157247
1	Lim	Garfield	7	-0.0158195	-0.0133653	-0.01838
1	Lim	Garfield	8	-0.0182352	-0.0152285	-0.0212407
1	Lim	Garfield	9	-0.0204663	-0.0170346	-0.0238797
1	Lim	Garfield	10	-0.0229085	-0.0192325	-0.0264465
1	Lim	Garfield	11	-0.0233203	-0.0192425	-0.0271821
1	Lim	Garfield	12	-0.0236549	-0.0193132	-0.0276825
1	Lim	Garfield	13	-0.0237788	-0.0194788	-0.0279793
1	Lim	Garfield	14	-0.0243236	-0.0200873	-0.0285727
1	Lim	Garfield	15	-0.0245205	-0.0198806	-0.0287435
1	Lim	Garfield	16	-0.0252859	-0.0208343	-0.0302683
1	Lim	Garfield	17	-0.0264003	-0.0216434	-0.0314965
1	Lim	Garfield	18	-0.0273463	-0.0221923	-0.0323884
1	Lim	Garfield	19	-0.0281864	-0.0229046	-0.0334428
1	Lim	Garfield	20	-0.0290084	-0.023719	-0.0346254
1	Lim	Garfield	21	-0.0299358	-0.0241949	-0.0351397
1	Lim	Garfield	22	-0.0306398	-0.0249673	-0.0366533
1	Lim	Garfield	23	-0.0310991	-0.0252099	-0.0368658
1	Lim	Garfield	24	-0.0320124	-0.026204	-0.0379568
1	Lim	Garfield	25	-0.0326298	-0.0262279	-0.0389702
1	Lim	Garfield	26	-0.0328035	-0.0267855	-0.0390688
1	Lim	Garfield	27	-0.0332205	-0.0271406	-0.0384236
1	Lim	Garfield	28	-0.033543	-0.0268355	-0.0396698
1	Lim	Garfield	29	-0.0338106	-0.0276417	-0.0402571
1	Lim	Garfield	30	-0.0340376	-0.0273633	-0.040322
1	Lim	Garfield	31	-0.0344005	-0.0278186	-0.0408261
1	Lim	Grant	1	-0.0011329	-0.0007263	-0.0015434
1	Lim	Grant	2	-0.0022856	-0.0015307	-0.0030373
1	Lim	Grant	3	-0.0034056	-0.0021936	-0.0046263
1	Lim	Grant	4	-0.0045333	-0.0029443	-0.0061272
1	Lim	Grant	5	-0.0057021	-0.003726	-0.0076635
1	Lim	Grant	6	-0.0068823	-0.0045365	-0.0092577
1	Lim	Grant	7	-0.0079899	-0.0053192	-0.0108794
1	Lim	Grant	8	-0.0090442	-0.005872	-0.0121457
1	Lim	Grant	9	-0.0102989	-0.0065017	-0.0138224
1	Lim	Grant	10	-0.0113644	-0.0075584	-0.0154721
1	Lim	Grant	11	-0.0116285	-0.0077416	-0.0153975
1	Lim	Grant	12	-0.0116635	-0.0075583	-0.0154826
1	Lim	Grant	13	-0.0115527	-0.007453	-0.0155444
1	Lim	Grant	14	-0.0115756	-0.0074242	-0.015706
1	Lim	Grant	15	-0.0117793	-0.0074833	-0.015682
1	Lim	Grant	16	-0.0116313	-0.0076599	-0.0156836
1	Lim	Grant	17	-0.0117409	-0.0082338	-0.0154587
1	Lim	Grant	18	-0.0117823	-0.0078761	-0.015417
1	Lim	Grant	19	-0.0115858	-0.0076885	-0.0156771
1	Lim	Grant	20	-0.0116681	-0.0076238	-0.0158868
1	Lim	Grant	21	-0.0119618	-0.0079094	-0.0156672
1	Lim	Grant	22	-0.0118874	-0.0079717	-0.0156709
1	Lim	Grant	23	-0.0119339	-0.0079715	-0.015941
1	Lim	Grant	24	-0.0119613	-0.0078148	-0.0157094
1	Lim	Grant	25	-0.0119861	-0.008019	-0.0161176
1	Lim	Grant	26	-0.0120348	-0.0081016	-0.0162792
1	Lim	Grant	27	-0.0120039	-0.0080022	-0.0157891
1	Lim	Grant	28	-0.0119084	-0.0079996	-0.0158642
1	Lim	Grant	29	-0.0120862	-0.0078925	-0.0160481
1	Lim	Grant	30	-0.012116	-0.0080493	-0.0161122
1	Lim	Grant	31	-0.0119258	-0.0079491	-0.0158907
1	Lim	Grays Harbor	1	-0.0511109	-0.0432612	-0.0587617
1	Lim	Grays Harbor	2	-0.101285	-0.0862794	-0.117407
1	Lim	Grays Harbor	3	-0.151786	-0.127988	-0.176152
1	Lim	Grays Harbor	4	-0.202566	-0.170918	-0.236734
1	Lim	Grays Harbor	5	-0.253808	-0.211149	-0.289883
1	Lim	Grays Harbor	6	-0.302907	-0.257513	-0.348543
1	Lim	Grays Harbor	7	-0.356548	-0.305178	-0.412498
1	Lim	Grays Harbor	8	-0.406486	-0.345869	-0.470098
1	Lim	Grays Harbor	9	-0.457794	-0.38907	-0.523191
1	Lim	Grays Harbor	10	-0.509494	-0.434988	-0.586705
1	Lim	Grays Harbor	11	-0.507177	-0.430088	-0.590877
1	Lim	Grays Harbor	12	-0.509126	-0.430671	-0.583356
1	Lim	Grays Harbor	13	-0.510743	-0.432838	-0.582717
1	Lim	Grays Harbor	14	-0.510229	-0.430714	-0.582467
1	Lim	Grays Harbor	15	-0.508695	-0.436508	-0.591725
1	Lim	Grays Harbor	16	-0.505677	-0.427463	-0.58468
1	Lim	Grays Harbor	17	-0.506051	-0.430871	-0.586469
1	Lim	Grays Harbor	18	-0.50682	-0.42471	-0.581997
1	Lim	Grays Harbor	19	-0.509178	-0.430479	-0.592085
1	Lim	Grays Harbor	20	-0.505709	-0.430903	-0.580246
1	Lim	Grays Harbor	21	-0.507749	-0.435383	-0.592203
1	Lim	Grays Harbor	22	-0.506702	-0.425152	-0.587426
1	Lim	Grays Harbor	23	-0.509155	-0.431473	-0.593991
1	Lim	Grays Harbor	24	-0.510494	-0.433194	-0.591773
1	Lim	Grays Harbor	25	-0.509282	-0.422527	-0.588302
1	Lim	Grays Harbor	26	-0.514764	-0.430589	-0.588653
1	Lim	Grays Harbor	27	-0.508742	-0.438132	-0.587065
1	Lim	Grays Harbor	28	-0.508711	-0.432001	-0.589745
1	Lim	Grays Harbor	29	-0.509217	-0.426142	-0.585242
1	Lim	Grays Harbor	30	-0.51225	-0.42705	-0.59014
1	Lim	Grays Harbor	31	-0.513089	-0.436145	-0.587706
1	Lim	Island	1	-0.0012809	-0.0010585	-0.0015244
1	Lim	Island	2	-0.0026166	-0.0021812	-0.0031025
1	Lim	Island	3	-0.0040167	-0.0033718	-0.0047263
1	Lim	Island	4	-0.0054261	-0.0045168	-0.0063512
1	Lim	Island	5	-0.0069595	-0.0057461	-0.0080944
1	Lim	Island	6	-0.0084478	-0.00711	-0.0099779
1	Lim	Island	7	-0.0101009	-0.008471	-0.011551
1	Lim	Island	8	-0.0117339	-0.0097785	-0.01349
1	Lim	Island	9	-0.0133289	-0.0112058	-0.0154432
1	Lim	Island	10	-0.0151858	-0.0127487	-0.0174805
1	Lim	Island	11	-0.0155922	-0.0131757	-0.0180515
1	Lim	Island	12	-0.0158749	-0.0134754	-0.0184446
1	Lim	Island	13	-0.016307	-0.0136978	-0.0190528
1	Lim	Island	14	-0.0167219	-0.0141944	-0.0196404
1	Lim	Island	15	-0.0171113	-0.0142777	-0.0197933
1	Lim	Island	16	-0.0176135	-0.0148239	-0.0205327
1	Lim	Island	17	-0.0178935	-0.0150305	-0.0206568
1	Lim	Island	18	-0.0181275	-0.0152213	-0.0210084
1	Lim	Island	19	-0.0185109	-0.0155092	-0.021369
1	Lim	Island	20	-0.0186965	-0.0157037	-0.0218116
1	Lim	Island	21	-0.0188506	-0.0159691	-0.0221246
1	Lim	Island	22	-0.0193772	-0.0161278	-0.022219
1	Lim	Island	23	-0.0195031	-0.015974	-0.0226073
1	Lim	Island	24	-0.0197793	-0.0164777	-0.0229114
1	Lim	Island	25	-0.0199976	-0.0168362	-0.023487
1	Lim	Island	26	-0.0201848	-0.0169467	-0.0235825
1	Lim	Island	27	-0.020387	-0.0173023	-0.0236499
1	Lim	Island	28	-0.0206988	-0.0174911	-0.0239831
1	Lim	Island	29	-0.0208566	-0.0172399	-0.0244214
1	Lim	Island	30	-0.021009	-0.0175049	-0.0243545
1	Lim	Island	31	-0.0209976	-0.0178924	-0.0246951
1	Lim	Jefferson	1	-0.014349	-0.0126648	-0.0159597
1	Lim	Jefferson	2	-0.0290517	-0.0256508	-0.0326813
1	Lim	Jefferson	3	-0.0437807	-0.0386643	-0.0485907
1	Lim	Jefferson	4	-0.0583972	-0.0516857	-0.0649114
1	Lim	Jefferson	5	-0.0733717	-0.0644685	-0.0824716
1	Lim	Jefferson	6	-0.0887866	-0.0781161	-0.0986749
1	Lim	Jefferson	7	-0.104126	-0.0920907	-0.116104
1	Lim	Jefferson	8	-0.119448	-0.106477	-0.133743
1	Lim	Jefferson	9	-0.135797	-0.12005	-0.149642
1	Lim	Jefferson	10	-0.151219	-0.134778	-0.168774
1	Lim	Jefferson	11	-0.152659	-0.134964	-0.169611
1	Lim	Jefferson	12	-0.153821	-0.137249	-0.170472
1	Lim	Jefferson	13	-0.155511	-0.138049	-0.17255
1	Lim	Jefferson	14	-0.156645	-0.139571	-0.173707
1	Lim	Jefferson	15	-0.158282	-0.141192	-0.174943
1	Lim	Jefferson	16	-0.159101	-0.141268	-0.175864
1	Lim	Jefferson	17	-0.159155	-0.142203	-0.176767
1	Lim	Jefferson	18	-0.160482	-0.142416	-0.178717
1	Lim	Jefferson	19	-0.161591	-0.145255	-0.179794
1	Lim	Jefferson	20	-0.162245	-0.144177	-0.179289
1	Lim	Jefferson	21	-0.163836	-0.146374	-0.183165
1	Lim	Jefferson	22	-0.164777	-0.147038	-0.182915
1	Lim	Jefferson	23	-0.164642	-0.146815	-0.183489
1	Lim	Jefferson	24	-0.166614	-0.148944	-0.18491
1	Lim	Jefferson	25	-0.166497	-0.14839	-0.184216
1	Lim	Jefferson	26	-0.167329	-0.149828	-0.186091
1	Lim	Jefferson	27	-0.168231	-0.148631	-0.185687
1	Lim	Jefferson	28	-0.168741	-0.149219	-0.188399
1	Lim	Jefferson	29	-0.16946	-0.151389	-0.18956
1	Lim	Jefferson	30	-0.169067	-0.150003	-0.187977
1	Lim	Jefferson	31	-0.170693	-0.15136	-0.189417
1	Lim	King	1	-0.0011886	-0.0008378	-0.0015269
1	Lim	King	2	-0.0023706	-0.0016245	-0.0030943
1	Lim	King	3	-0.0035775	-0.002469	-0.0046986
1	Lim	King	4	-0.004748	-0.0032921	-0.0062605
1	Lim	King	5	-0.0059701	-0.0041644	-0.0077739
1	Lim	King	6	-0.0072103	-0.004938	-0.0092124
1	Lim	King	7	-0.008396	-0.0058063	-0.0109187
1	Lim	King	8	-0.0096018	-0.0066115	-0.0124888
1	Lim	King	9	-0.0107985	-0.0072642	-0.0140093
1	Lim	King	10	-0.0120134	-0.0086145	-0.0156439
1	Lim	King	11	-0.0119501	-0.0082427	-0.0159805
1	Lim	King	12	-0.0120646	-0.0085375	-0.0157127
1	Lim	King	13	-0.0121738	-0.0086862	-0.0157265
1	Lim	King	14	-0.0121412	-0.0083336	-0.015767
1	Lim	King	15	-0.0120659	-0.0086953	-0.0157803
1	Lim	King	16	-0.0121502	-0.0086789	-0.0163536
1	Lim	King	17	-0.0120644	-0.0085347	-0.0158011
1	Lim	King	18	-0.0121881	-0.0084999	-0.0159891
1	Lim	King	19	-0.0122184	-0.0085395	-0.01568
1	Lim	King	20	-0.0122429	-0.0086657	-0.0158715
1	Lim	King	21	-0.0123272	-0.0087042	-0.0157282
1	Lim	King	22	-0.0123088	-0.0084464	-0.0162932
1	Lim	King	23	-0.0122192	-0.00843	-0.0160702
1	Lim	King	24	-0.0123999	-0.0087189	-0.0162377
1	Lim	King	25	-0.01232	-0.0087369	-0.0159279
1	Lim	King	26	-0.0124477	-0.0088891	-0.0160218
1	Lim	King	27	-0.0123281	-0.008595	-0.0160225
1	Lim	King	28	-0.0121903	-0.0085436	-0.0160769
1	Lim	King	29	-0.0123989	-0.0087341	-0.0158477
1	Lim	King	30	-0.0123752	-0.0086204	-0.0158788
1	Lim	King	31	-0.0123443	-0.0087477	-0.0161571
1	Lim	Kitsap	1	-0.0044153	-0.0038087	-0.0050123
1	Lim	Kitsap	2	-0.0088911	-0.007604	-0.0101195
1	Lim	Kitsap	3	-0.0134378	-0.011616	-0.0153125
1	Lim	Kitsap	4	-0.0180444	-0.0155902	-0.0206825
1	Lim	Kitsap	5	-0.0226157	-0.0195727	-0.0258022
1	Lim	Kitsap	6	-0.027368	-0.0236583	-0.0309863
1	Lim	Kitsap	7	-0.0319691	-0.0276591	-0.0361615
1	Lim	Kitsap	8	-0.0367886	-0.0315904	-0.0418662
1	Lim	Kitsap	9	-0.0415971	-0.0361445	-0.0472753
1	Lim	Kitsap	10	-0.0466259	-0.040241	-0.0529847
1	Lim	Kitsap	11	-0.0466819	-0.0404364	-0.052763
1	Lim	Kitsap	12	-0.047435	-0.0410898	-0.0539806
1	Lim	Kitsap	13	-0.0478408	-0.0414573	-0.0540737
1	Lim	Kitsap	14	-0.0479259	-0.0421232	-0.0548394
1	Lim	Kitsap	15	-0.0486415	-0.0425431	-0.0553491
1	Lim	Kitsap	16	-0.0487484	-0.042267	-0.0548816
1	Lim	Kitsap	17	-0.04914	-0.0429152	-0.0555938
1	Lim	Kitsap	18	-0.0492061	-0.0429525	-0.0557358
1	Lim	Kitsap	19	-0.0497857	-0.0437742	-0.056534
1	Lim	Kitsap	20	-0.0499989	-0.043807	-0.0568677
1	Lim	Kitsap	21	-0.0503943	-0.0440008	-0.0568829
1	Lim	Kitsap	22	-0.0503697	-0.0436336	-0.0569361
1	Lim	Kitsap	23	-0.0508033	-0.0442503	-0.0574598
1	Lim	Kitsap	24	-0.051392	-0.0445216	-0.0581703
1	Lim	Kitsap	25	-0.0515999	-0.0445693	-0.0581663
1	Lim	Kitsap	26	-0.0515743	-0.0446897	-0.0588642
1	Lim	Kitsap	27	-0.0517532	-0.0448742	-0.0583314
1	Lim	Kitsap	28	-0.0520829	-0.0448395	-0.0588707
1	Lim	Kitsap	29	-0.0520553	-0.0451906	-0.0587917
1	Lim	Kitsap	30	-0.0522713	-0.04572	-0.0593534
1	Lim	Kitsap	31	-0.0522364	-0.045765	-0.0597764
1	Lim	Kittitas	1	-0.0083646	-0.0070879	-0.0096437
1	Lim	Kittitas	2	-0.0167867	-0.0145326	-0.0191317
1	Lim	Kittitas	3	-0.0253505	-0.0216618	-0.0292908
1	Lim	Kittitas	4	-0.0338665	-0.0291088	-0.0384931
1	Lim	Kittitas	5	-0.0425582	-0.0363696	-0.0484542
1	Lim	Kittitas	6	-0.0511842	-0.043721	-0.0589666
1	Lim	Kittitas	7	-0.059985	-0.0520949	-0.0683391
1	Lim	Kittitas	8	-0.0685843	-0.0586544	-0.0786378
1	Lim	Kittitas	9	-0.0779792	-0.0654846	-0.0882559
1	Lim	Kittitas	10	-0.0864856	-0.0742203	-0.0978915
1	Lim	Kittitas	11	-0.0874547	-0.074584	-0.0995894
1	Lim	Kittitas	12	-0.0879198	-0.0747033	-0.10012
1	Lim	Kittitas	13	-0.0884601	-0.0757448	-0.101512
1	Lim	Kittitas	14	-0.088865	-0.0763285	-0.101548
1	Lim	Kittitas	15	-0.0888702	-0.0756872	-0.103276
1	Lim	Kittitas	16	-0.0895156	-0.0764159	-0.102976
1	Lim	Kittitas	17	-0.0904673	-0.0771271	-0.104202
1	Lim	Kittitas	18	-0.0906609	-0.0756123	-0.104141
1	Lim	Kittitas	19	-0.0909982	-0.0756627	-0.105711
1	Lim	Kittitas	20	-0.0913584	-0.0773876	-0.105402
1	Lim	Kittitas	21	-0.0921862	-0.0785467	-0.106278
1	Lim	Kittitas	22	-0.0923604	-0.0780554	-0.107968
1	Lim	Kittitas	23	-0.0930798	-0.0784786	-0.10738
1	Lim	Kittitas	24	-0.0928984	-0.0775047	-0.10843
1	Lim	Kittitas	25	-0.0930987	-0.0784455	-0.109999
1	Lim	Kittitas	26	-0.0932305	-0.0777767	-0.108661
1	Lim	Kittitas	27	-0.0941936	-0.0791724	-0.1096
1	Lim	Kittitas	28	-0.0944759	-0.0791598	-0.110681
1	Lim	Kittitas	29	-0.0949574	-0.0774733	-0.110185
1	Lim	Kittitas	30	-0.0949101	-0.0793424	-0.112139
1	Lim	Kittitas	31	-0.095098	-0.0789571	-0.110281
1	Lim	Klickitat	1	-0.0270383	-0.0227676	-0.0312134
1	Lim	Klickitat	2	-0.0542196	-0.0457479	-0.062604
1	Lim	Klickitat	3	-0.0813765	-0.0694913	-0.0937295
1	Lim	Klickitat	4	-0.109986	-0.0922162	-0.128146
1	Lim	Klickitat	5	-0.137506	-0.114631	-0.159312
1	Lim	Klickitat	6	-0.164495	-0.137065	-0.190082
1	Lim	Klickitat	7	-0.192592	-0.160545	-0.22162
1	Lim	Klickitat	8	-0.220396	-0.184844	-0.25616
1	Lim	Klickitat	9	-0.248604	-0.208755	-0.289566
1	Lim	Klickitat	10	-0.275697	-0.232047	-0.31938
1	Lim	Klickitat	11	-0.27804	-0.232001	-0.32036
1	Lim	Klickitat	12	-0.279259	-0.235495	-0.324324
1	Lim	Klickitat	13	-0.281642	-0.237025	-0.325525
1	Lim	Klickitat	14	-0.280422	-0.235731	-0.322557
1	Lim	Klickitat	15	-0.281049	-0.238061	-0.327178
1	Lim	Klickitat	16	-0.281032	-0.23488	-0.324329
1	Lim	Klickitat	17	-0.285354	-0.241994	-0.329742
1	Lim	Klickitat	18	-0.283775	-0.238716	-0.330166
1	Lim	Klickitat	19	-0.284898	-0.239576	-0.328854
1	Lim	Klickitat	20	-0.285298	-0.241645	-0.327551
1	Lim	Klickitat	21	-0.286796	-0.2424	-0.33363
1	Lim	Klickitat	22	-0.284473	-0.240201	-0.334187
1	Lim	Klickitat	23	-0.288041	-0.241282	-0.334876
1	Lim	Klickitat	24	-0.287809	-0.240085	-0.334862
1	Lim	Klickitat	25	-0.288338	-0.242902	-0.337864
1	Lim	Klickitat	26	-0.288954	-0.242204	-0.336443
1	Lim	Klickitat	27	-0.287441	-0.243351	-0.337821
1	Lim	Klickitat	28	-0.291316	-0.242587	-0.338853
1	Lim	Klickitat	29	-0.289477	-0.243191	-0.33639
1	Lim	Klickitat	30	-0.291122	-0.241302	-0.33781
1	Lim	Klickitat	31	-0.292486	-0.247996	-0.340808
1	Lim	Lewis	1	-0.0277775	-0.0244571	-0.0314021
1	Lim	Lewis	2	-0.055768	-0.0492369	-0.0629765
1	Lim	Lewis	3	-0.08397	-0.0741404	-0.0943666
1	Lim	Lewis	4	-0.112314	-0.0991977	-0.126055
1	Lim	Lewis	5	-0.141711	-0.123357	-0.15811
1	Lim	Lewis	6	-0.170532	-0.149485	-0.191216
1	Lim	Lewis	7	-0.201155	-0.175373	-0.222734
1	Lim	Lewis	8	-0.229883	-0.203923	-0.25737
1	Lim	Lewis	9	-0.259676	-0.229398	-0.291716
1	Lim	Lewis	10	-0.290731	-0.256029	-0.324355
1	Lim	Lewis	11	-0.293091	-0.259022	-0.325275
1	Lim	Lewis	12	-0.296008	-0.262164	-0.330126
1	Lim	Lewis	13	-0.297029	-0.26392	-0.328823
1	Lim	Lewis	14	-0.301104	-0.266576	-0.334766
1	Lim	Lewis	15	-0.301313	-0.267266	-0.335676
1	Lim	Lewis	16	-0.302914	-0.268248	-0.337165
1	Lim	Lewis	17	-0.304487	-0.271185	-0.339799
1	Lim	Lewis	18	-0.306908	-0.270637	-0.343796
1	Lim	Lewis	19	-0.306521	-0.271924	-0.341597
1	Lim	Lewis	20	-0.309211	-0.27409	-0.345945
1	Lim	Lewis	21	-0.311875	-0.277114	-0.347168
1	Lim	Lewis	22	-0.312841	-0.277195	-0.346394
1	Lim	Lewis	23	-0.312892	-0.276716	-0.348979
1	Lim	Lewis	24	-0.314581	-0.279689	-0.349146
1	Lim	Lewis	25	-0.315468	-0.276223	-0.350284
1	Lim	Lewis	26	-0.317587	-0.277458	-0.355537
1	Lim	Lewis	27	-0.320037	-0.282862	-0.357343
1	Lim	Lewis	28	-0.319769	-0.283347	-0.35602
1	Lim	Lewis	29	-0.319391	-0.284297	-0.357691
1	Lim	Lewis	30	-0.319898	-0.285216	-0.359332
1	Lim	Lewis	31	-0.32263	-0.284875	-0.358589
1	Lim	Lincoln	1	-0.001394	-0.0009954	-0.0017965
1	Lim	Lincoln	2	-0.0028145	-0.0020259	-0.0036003
1	Lim	Lincoln	3	-0.0042639	-0.0030803	-0.0055105
1	Lim	Lincoln	4	-0.0058477	-0.0041896	-0.0073413
1	Lim	Lincoln	5	-0.0073677	-0.0054002	-0.0094029
1	Lim	Lincoln	6	-0.0089816	-0.0065064	-0.011295
1	Lim	Lincoln	7	-0.010538	-0.0075879	-0.013256
1	Lim	Lincoln	8	-0.0122336	-0.0087583	-0.0156695
1	Lim	Lincoln	9	-0.0139549	-0.0099655	-0.0176118
1	Lim	Lincoln	10	-0.015619	-0.0111763	-0.0195391
1	Lim	Lincoln	11	-0.0158337	-0.0110868	-0.020164
1	Lim	Lincoln	12	-0.0163169	-0.0118832	-0.0208789
1	Lim	Lincoln	13	-0.0164744	-0.0116701	-0.0212517
1	Lim	Lincoln	14	-0.0167423	-0.0119582	-0.0215432
1	Lim	Lincoln	15	-0.0172049	-0.0118271	-0.0216855
1	Lim	Lincoln	16	-0.0175222	-0.0118764	-0.0223749
1	Lim	Lincoln	17	-0.017264	-0.0122631	-0.0228042
1	Lim	Lincoln	18	-0.0175663	-0.0123116	-0.0232968
1	Lim	Lincoln	19	-0.0179017	-0.012268	-0.0236587
1	Lim	Lincoln	20	-0.0181262	-0.0123	-0.0236929
1	Lim	Lincoln	21	-0.018315	-0.0126473	-0.0242876
1	Lim	Lincoln	22	-0.0184147	-0.0126914	-0.0248737
1	Lim	Lincoln	23	-0.0187956	-0.0126125	-0.0249262
1	Lim	Lincoln	24	-0.0190864	-0.0125271	-0.0252315
1	Lim	Lincoln	25	-0.0188768	-0.0129217	-0.025376
1	Lim	Lincoln	26	-0.0193053	-0.0129661	-0.0255782
1	Lim	Lincoln	27	-0.0191864	-0.0128686	-0.0262731
1	Lim	Lincoln	28	-0.0195935	-0.0127365	-0.0263198
1	Lim	Lincoln	29	-0.0196482	-0.0127369	-0.0261462
1	Lim	Lincoln	30	-0.0195113	-0.0128418	-0.0264684
1	Lim	Lincoln	31	-0.0199856	-0.0128788	-0.0264797
1	Lim	Mason	1	-0.0126552	-0.0113455	-0.0138617
1	Lim	Mason	2	-0.0254134	-0.0229264	-0.0280298
1	Lim	Mason	3	-0.0384888	-0.0346719	-0.0419855
1	Lim	Mason	4	-0.0517993	-0.0462977	-0.0569858
1	Lim	Mason	5	-0.064971	-0.0583662	-0.0716153
1	Lim	Mason	6	-0.078403	-0.0707611	-0.0862252
1	Lim	Mason	7	-0.0923058	-0.0831938	-0.101724
1	Lim	Mason	8	-0.105988	-0.0954558	-0.11676
1	Lim	Mason	9	-0.119724	-0.107633	-0.132341
1	Lim	Mason	10	-0.134023	-0.121161	-0.146659
1	Lim	Mason	11	-0.136054	-0.121719	-0.148137
1	Lim	Mason	12	-0.136813	-0.123272	-0.150437
1	Lim	Mason	13	-0.138047	-0.124886	-0.150982
1	Lim	Mason	14	-0.139101	-0.126165	-0.153172
1	Lim	Mason	15	-0.140604	-0.127708	-0.153992
1	Lim	Mason	16	-0.142083	-0.127329	-0.156107
1	Lim	Mason	17	-0.143238	-0.128496	-0.156772
1	Lim	Mason	18	-0.143626	-0.130117	-0.158355
1	Lim	Mason	19	-0.145006	-0.130748	-0.158739
1	Lim	Mason	20	-0.146278	-0.130402	-0.160432
1	Lim	Mason	21	-0.146972	-0.132923	-0.161351
1	Lim	Mason	22	-0.148182	-0.133313	-0.162845
1	Lim	Mason	23	-0.148507	-0.134411	-0.163472
1	Lim	Mason	24	-0.149552	-0.133781	-0.163305
1	Lim	Mason	25	-0.149984	-0.135031	-0.164743
1	Lim	Mason	26	-0.150717	-0.136089	-0.165714
1	Lim	Mason	27	-0.151383	-0.137212	-0.167037
1	Lim	Mason	28	-0.152399	-0.136635	-0.168095
1	Lim	Mason	29	-0.152679	-0.138471	-0.169353
1	Lim	Mason	30	-0.154108	-0.13884	-0.169721
1	Lim	Mason	31	-0.154556	-0.138511	-0.169535
1	Lim	Okanogan	1	-0.0005033	-0.0003307	-0.0007944
1	Lim	Okanogan	2	-0.0010513	-0.0007372	-0.0013972
1	Lim	Okanogan	3	-0.0015978	-0.0011848	-0.0020155
1	Lim	Okanogan	4	-0.0021239	-0.0016525	-0.0026207
1	Lim	Okanogan	5	-0.0026461	-0.002051	-0.0033165
1	Lim	Okanogan	6	-0.0031381	-0.0024872	-0.0039048
1	Lim	Okanogan	7	-0.0036263	-0.0028435	-0.0044535
1	Lim	Okanogan	8	-0.0041431	-0.0032578	-0.0050364
1	Lim	Okanogan	9	-0.0046486	-0.0036776	-0.0056474
1	Lim	Okanogan	10	-0.0050798	-0.0039749	-0.0061744
1	Lim	Okanogan	11	-0.0051011	-0.0040363	-0.0062732
1	Lim	Okanogan	12	-0.0052575	-0.004133	-0.0064047
1	Lim	Okanogan	13	-0.0051631	-0.0041039	-0.0064256
1	Lim	Okanogan	14	-0.0053486	-0.0041441	-0.0065316
1	Lim	Okanogan	15	-0.0054435	-0.0043285	-0.0065984
1	Lim	Okanogan	16	-0.0056714	-0.004532	-0.0068783
1	Lim	Okanogan	17	-0.0058539	-0.0046829	-0.0070256
1	Lim	Okanogan	18	-0.0060356	-0.0048839	-0.0071792
1	Lim	Okanogan	19	-0.0062427	-0.0051311	-0.0073876
1	Lim	Okanogan	20	-0.0064135	-0.0051929	-0.0077043
1	Lim	Okanogan	21	-0.0066198	-0.0053613	-0.0078506
1	Lim	Okanogan	22	-0.0067576	-0.0054912	-0.0079635
1	Lim	Okanogan	23	-0.0069707	-0.0057061	-0.0083352
1	Lim	Okanogan	24	-0.0070738	-0.0057797	-0.0083648
1	Lim	Okanogan	25	-0.0072113	-0.0059168	-0.0084339
1	Lim	Okanogan	26	-0.0072945	-0.006048	-0.0085998
1	Lim	Okanogan	27	-0.0074545	-0.0060667	-0.0087852
1	Lim	Okanogan	28	-0.0075731	-0.006205	-0.0089122
1	Lim	Okanogan	29	-0.0076861	-0.0063347	-0.0090397
1	Lim	Okanogan	30	-0.0077527	-0.0063218	-0.0090648
1	Lim	Okanogan	31	-0.0078825	-0.0065263	-0.009332
1	Lim	Pacific	1	-0.0332171	-0.0272931	-0.0387062
1	Lim	Pacific	2	-0.0665192	-0.0560529	-0.077056
1	Lim	Pacific	3	-0.100068	-0.0833262	-0.117394
1	Lim	Pacific	4	-0.134702	-0.111671	-0.157612
1	Lim	Pacific	5	-0.169113	-0.139593	-0.196477
1	Lim	Pacific	6	-0.203826	-0.171053	-0.23617
1	Lim	Pacific	7	-0.237636	-0.201165	-0.27519
1	Lim	Pacific	8	-0.272649	-0.227175	-0.318644
1	Lim	Pacific	9	-0.30948	-0.260572	-0.35982
1	Lim	Pacific	10	-0.345158	-0.288745	-0.406229
1	Lim	Pacific	11	-0.346576	-0.28865	-0.402486
1	Lim	Pacific	12	-0.348219	-0.294079	-0.405243
1	Lim	Pacific	13	-0.352474	-0.291749	-0.409805
1	Lim	Pacific	14	-0.356581	-0.298647	-0.411418
1	Lim	Pacific	15	-0.355513	-0.299096	-0.41839
1	Lim	Pacific	16	-0.357692	-0.302267	-0.422272
1	Lim	Pacific	17	-0.363327	-0.30775	-0.422424
1	Lim	Pacific	18	-0.365518	-0.305597	-0.423147
1	Lim	Pacific	19	-0.363647	-0.303241	-0.423683
1	Lim	Pacific	20	-0.36909	-0.314735	-0.42748
1	Lim	Pacific	21	-0.367828	-0.313804	-0.42481
1	Lim	Pacific	22	-0.369732	-0.31227	-0.423788
1	Lim	Pacific	23	-0.372602	-0.318362	-0.430962
1	Lim	Pacific	24	-0.37438	-0.314491	-0.432994
1	Lim	Pacific	25	-0.378198	-0.316215	-0.435463
1	Lim	Pacific	26	-0.37759	-0.321052	-0.437874
1	Lim	Pacific	27	-0.37769	-0.320374	-0.434208
1	Lim	Pacific	28	-0.379147	-0.317855	-0.436069
1	Lim	Pacific	29	-0.38189	-0.32423	-0.437675
1	Lim	Pacific	30	-0.381274	-0.323004	-0.438067
1	Lim	Pacific	31	-0.380249	-0.322056	-0.441227
1	Lim	Pend Oreille	1	-0.0089329	-0.0077213	-0.0100604
1	Lim	Pend Oreille	2	-0.0178812	-0.0155257	-0.0204091
1	Lim	Pend Oreille	3	-0.027005	-0.0236846	-0.0303538
1	Lim	Pend Oreille	4	-0.0361952	-0.0311634	-0.0409305
1	Lim	Pend Oreille	5	-0.0448231	-0.0391195	-0.0508876
1	Lim	Pend Oreille	6	-0.0541913	-0.0471564	-0.0615896
1	Lim	Pend Oreille	7	-0.0631127	-0.0549096	-0.0717341
1	Lim	Pend Oreille	8	-0.073038	-0.063584	-0.0821086
1	Lim	Pend Oreille	9	-0.081568	-0.070801	-0.0925418
1	Lim	Pend Oreille	10	-0.0916811	-0.0791424	-0.103502
1	Lim	Pend Oreille	11	-0.0915581	-0.0800899	-0.104056
1	Lim	Pend Oreille	12	-0.0922636	-0.0806257	-0.104828
1	Lim	Pend Oreille	13	-0.0929845	-0.0796596	-0.105372
1	Lim	Pend Oreille	14	-0.0933738	-0.080697	-0.105693
1	Lim	Pend Oreille	15	-0.0936587	-0.0805046	-0.10634
1	Lim	Pend Oreille	16	-0.0933082	-0.0816278	-0.105724
1	Lim	Pend Oreille	17	-0.0940233	-0.0811902	-0.106688
1	Lim	Pend Oreille	18	-0.0941524	-0.0810889	-0.107417
1	Lim	Pend Oreille	19	-0.0949267	-0.0816807	-0.108133
1	Lim	Pend Oreille	20	-0.0949355	-0.0818539	-0.108111
1	Lim	Pend Oreille	21	-0.0951158	-0.081339	-0.108729
1	Lim	Pend Oreille	22	-0.0953386	-0.0822481	-0.107968
1	Lim	Pend Oreille	23	-0.0955031	-0.0813041	-0.109172
1	Lim	Pend Oreille	24	-0.0959948	-0.082328	-0.108968
1	Lim	Pend Oreille	25	-0.0957966	-0.0826245	-0.110132
1	Lim	Pend Oreille	26	-0.096474	-0.0832156	-0.109911
1	Lim	Pend Oreille	27	-0.0968216	-0.0831117	-0.111061
1	Lim	Pend Oreille	28	-0.0972229	-0.0817917	-0.110734
1	Lim	Pend Oreille	29	-0.0973178	-0.0829218	-0.11115
1	Lim	Pend Oreille	30	-0.0966473	-0.0825004	-0.111924
1	Lim	Pend Oreille	31	-0.0971085	-0.0826889	-0.111871
1	Lim	Pierce	1	-0.0222352	-0.0186089	-0.0261941
1	Lim	Pierce	2	-0.0449687	-0.0377999	-0.0521207
1	Lim	Pierce	3	-0.0675989	-0.0566326	-0.0788759
1	Lim	Pierce	4	-0.0907855	-0.0763804	-0.104199
1	Lim	Pierce	5	-0.114899	-0.0953353	-0.132026
1	Lim	Pierce	6	-0.139489	-0.116617	-0.159692
1	Lim	Pierce	7	-0.16214	-0.13569	-0.185444
1	Lim	Pierce	8	-0.186901	-0.157303	-0.215193
1	Lim	Pierce	9	-0.210369	-0.178558	-0.245154
1	Lim	Pierce	10	-0.236692	-0.199675	-0.273108
1	Lim	Pierce	11	-0.236009	-0.198012	-0.271714
1	Lim	Pierce	12	-0.239433	-0.200793	-0.277252
1	Lim	Pierce	13	-0.241078	-0.204909	-0.279278
1	Lim	Pierce	14	-0.245032	-0.206918	-0.281042
1	Lim	Pierce	15	-0.245927	-0.209365	-0.282006
1	Lim	Pierce	16	-0.246329	-0.209466	-0.283499
1	Lim	Pierce	17	-0.249344	-0.209695	-0.287698
1	Lim	Pierce	18	-0.251944	-0.214227	-0.288143
1	Lim	Pierce	19	-0.25184	-0.214307	-0.291991
1	Lim	Pierce	20	-0.253977	-0.214551	-0.290316
1	Lim	Pierce	21	-0.255888	-0.216224	-0.293519
1	Lim	Pierce	22	-0.255617	-0.217193	-0.294255
1	Lim	Pierce	23	-0.256455	-0.218998	-0.296998
1	Lim	Pierce	24	-0.258168	-0.222321	-0.298009
1	Lim	Pierce	25	-0.259774	-0.218449	-0.300774
1	Lim	Pierce	26	-0.261414	-0.221485	-0.297671
1	Lim	Pierce	27	-0.262116	-0.226265	-0.301093
1	Lim	Pierce	28	-0.264113	-0.225009	-0.303157
1	Lim	Pierce	29	-0.262928	-0.227233	-0.300912
1	Lim	Pierce	30	-0.264517	-0.224454	-0.304028
1	Lim	Pierce	31	-0.266766	-0.226707	-0.30363
1	Lim	San Juan	1	-0.0004977	-0.0004273	-0.0005706
1	Lim	San Juan	2	-0.0010432	-0.0008955	-0.0011925
1	Lim	San Juan	3	-0.0016232	-0.0013797	-0.0018527
1	Lim	San Juan	4	-0.0022512	-0.0019184	-0.0025882
1	Lim	San Juan	5	-0.0029034	-0.002474	-0.003292
1	Lim	San Juan	6	-0.0036198	-0.0031074	-0.0041351
1	Lim	San Juan	7	-0.0043361	-0.0037402	-0.0049991
1	Lim	San Juan	8	-0.0051084	-0.004367	-0.0058758
1	Lim	San Juan	9	-0.0058998	-0.0050579	-0.0067994
1	Lim	San Juan	10	-0.0067268	-0.0057122	-0.0077133
1	Lim	San Juan	11	-0.0071034	-0.0060524	-0.0081737
1	Lim	San Juan	12	-0.0074066	-0.0062463	-0.0086282
1	Lim	San Juan	13	-0.0077411	-0.0065107	-0.0089753
1	Lim	San Juan	14	-0.0079966	-0.0067019	-0.0093511
1	Lim	San Juan	15	-0.0083419	-0.0069317	-0.009678
1	Lim	San Juan	16	-0.0085829	-0.0071092	-0.0101081
1	Lim	San Juan	17	-0.0088171	-0.0072835	-0.0103872
1	Lim	San Juan	18	-0.0090841	-0.0074862	-0.0107184
1	Lim	San Juan	19	-0.0093401	-0.0076039	-0.0109744
1	Lim	San Juan	20	-0.0095298	-0.0078248	-0.011279
1	Lim	San Juan	21	-0.0098142	-0.0079479	-0.0115799
1	Lim	San Juan	22	-0.0099448	-0.0080489	-0.0119726
1	Lim	San Juan	23	-0.0101357	-0.0081501	-0.012096
1	Lim	San Juan	24	-0.0102814	-0.0083327	-0.0123742
1	Lim	San Juan	25	-0.0105246	-0.0084542	-0.0125624
1	Lim	San Juan	26	-0.0106777	-0.0085404	-0.0127894
1	Lim	San Juan	27	-0.010867	-0.0086321	-0.0129345
1	Lim	San Juan	28	-0.0110856	-0.0086526	-0.0132286
1	Lim	San Juan	29	-0.0111493	-0.008818	-0.0132386
1	Lim	San Juan	30	-0.0112307	-0.0090629	-0.0135288
1	Lim	San Juan	31	-0.0114786	-0.009125	-0.0136258
1	Lim	Skagit	1	-0.0089126	-0.0076173	-0.0102607
1	Lim	Skagit	2	-0.0177806	-0.0151291	-0.0204149
1	Lim	Skagit	3	-0.0269922	-0.0231032	-0.0310772
1	Lim	Skagit	4	-0.0361193	-0.0310618	-0.041645
1	Lim	Skagit	5	-0.0453183	-0.0387998	-0.0520493
1	Lim	Skagit	6	-0.0542903	-0.0468438	-0.0626007
1	Lim	Skagit	7	-0.0640556	-0.0551966	-0.0738595
1	Lim	Skagit	8	-0.073695	-0.0629441	-0.0845932
1	Lim	Skagit	9	-0.0831662	-0.0717055	-0.0949827
1	Lim	Skagit	10	-0.0925772	-0.0797233	-0.105978
1	Lim	Skagit	11	-0.0935725	-0.0811442	-0.106243
1	Lim	Skagit	12	-0.0946646	-0.0808656	-0.108879
1	Lim	Skagit	13	-0.0948671	-0.0818453	-0.108569
1	Lim	Skagit	14	-0.0957998	-0.0821741	-0.109388
1	Lim	Skagit	15	-0.0963019	-0.0823418	-0.110266
1	Lim	Skagit	16	-0.0967748	-0.0828955	-0.110359
1	Lim	Skagit	17	-0.0977505	-0.0832101	-0.111033
1	Lim	Skagit	18	-0.0985745	-0.0852341	-0.113236
1	Lim	Skagit	19	-0.0987601	-0.0842973	-0.113074
1	Lim	Skagit	20	-0.0997803	-0.085962	-0.113445
1	Lim	Skagit	21	-0.0999543	-0.0861023	-0.114503
1	Lim	Skagit	22	-0.100701	-0.0870892	-0.114539
1	Lim	Skagit	23	-0.101442	-0.086563	-0.115576
1	Lim	Skagit	24	-0.101401	-0.0879233	-0.11466
1	Lim	Skagit	25	-0.102452	-0.0888789	-0.115921
1	Lim	Skagit	26	-0.10193	-0.0888025	-0.115812
1	Lim	Skagit	27	-0.10356	-0.0894646	-0.116748
1	Lim	Skagit	28	-0.103668	-0.0900964	-0.118079
1	Lim	Skagit	29	-0.10441	-0.0909234	-0.118053
1	Lim	Skagit	30	-0.104762	-0.0905259	-0.118384
1	Lim	Skagit	31	-0.104926	-0.0911178	-0.118524
1	Lim	Skamania	1	-0.009595	-0.0083719	-0.0107855
1	Lim	Skamania	2	-0.0191431	-0.0164936	-0.0218127
1	Lim	Skamania	3	-0.0292074	-0.0253289	-0.0328255
1	Lim	Skamania	4	-0.0388021	-0.0337057	-0.0437957
1	Lim	Skamania	5	-0.0487972	-0.0426132	-0.0550487
1	Lim	Skamania	6	-0.0588343	-0.0514731	-0.0666673
1	Lim	Skamania	7	-0.0690482	-0.0608479	-0.0777208
1	Lim	Skamania	8	-0.0792651	-0.0687617	-0.0891508
1	Lim	Skamania	9	-0.0897888	-0.0785816	-0.101428
1	Lim	Skamania	10	-0.0999246	-0.0871886	-0.11297
1	Lim	Skamania	11	-0.100941	-0.0891817	-0.11343
1	Lim	Skamania	12	-0.101627	-0.0896862	-0.114127
1	Lim	Skamania	13	-0.102408	-0.0905972	-0.114588
1	Lim	Skamania	14	-0.103335	-0.0914994	-0.115568
1	Lim	Skamania	15	-0.104323	-0.0917559	-0.116656
1	Lim	Skamania	16	-0.10511	-0.0916358	-0.117202
1	Lim	Skamania	17	-0.105077	-0.0922804	-0.11936
1	Lim	Skamania	18	-0.10641	-0.0941222	-0.118929
1	Lim	Skamania	19	-0.106772	-0.0935024	-0.120364
1	Lim	Skamania	20	-0.107466	-0.094527	-0.119957
1	Lim	Skamania	21	-0.108357	-0.0950247	-0.121591
1	Lim	Skamania	22	-0.10875	-0.0946104	-0.121497
1	Lim	Skamania	23	-0.108666	-0.0951665	-0.12113
1	Lim	Skamania	24	-0.109046	-0.0968996	-0.122321
1	Lim	Skamania	25	-0.109807	-0.0964548	-0.124045
1	Lim	Skamania	26	-0.110621	-0.0975819	-0.12388
1	Lim	Skamania	27	-0.110706	-0.0975253	-0.123565
1	Lim	Skamania	28	-0.111068	-0.097689	-0.124062
1	Lim	Skamania	29	-0.111307	-0.098265	-0.12531
1	Lim	Skamania	30	-0.111767	-0.0985891	-0.125033
1	Lim	Skamania	31	-0.112523	-0.0982732	-0.125825
1	Lim	Snohomish	1	-0.0139236	-0.0123698	-0.0153639
1	Lim	Snohomish	2	-0.0278928	-0.0246165	-0.0309822
1	Lim	Snohomish	3	-0.0419759	-0.0375802	-0.0470874
1	Lim	Snohomish	4	-0.0566332	-0.0500371	-0.0624919
1	Lim	Snohomish	5	-0.0712168	-0.0631541	-0.0782697
1	Lim	Snohomish	6	-0.0854163	-0.0758769	-0.0956277
1	Lim	Snohomish	7	-0.100996	-0.0897062	-0.111711
1	Lim	Snohomish	8	-0.115698	-0.102354	-0.127853
1	Lim	Snohomish	9	-0.130432	-0.117205	-0.144852
1	Lim	Snohomish	10	-0.145481	-0.130195	-0.160658
1	Lim	Snohomish	11	-0.147589	-0.132629	-0.162928
1	Lim	Snohomish	12	-0.148275	-0.132379	-0.163384
1	Lim	Snohomish	13	-0.149646	-0.133659	-0.165735
1	Lim	Snohomish	14	-0.151127	-0.135626	-0.165867
1	Lim	Snohomish	15	-0.152846	-0.136829	-0.168352
1	Lim	Snohomish	16	-0.154242	-0.138334	-0.170431
1	Lim	Snohomish	17	-0.154998	-0.139235	-0.17166
1	Lim	Snohomish	18	-0.156543	-0.140062	-0.172679
1	Lim	Snohomish	19	-0.156749	-0.13967	-0.172583
1	Lim	Snohomish	20	-0.157939	-0.141375	-0.174419
1	Lim	Snohomish	21	-0.158718	-0.14141	-0.177307
1	Lim	Snohomish	22	-0.159784	-0.143982	-0.176126
1	Lim	Snohomish	23	-0.160849	-0.143844	-0.177706
1	Lim	Snohomish	24	-0.161612	-0.144545	-0.178147
1	Lim	Snohomish	25	-0.161796	-0.145338	-0.178575
1	Lim	Snohomish	26	-0.163812	-0.146606	-0.179793
1	Lim	Snohomish	27	-0.164272	-0.147318	-0.18119
1	Lim	Snohomish	28	-0.164811	-0.147984	-0.181782
1	Lim	Snohomish	29	-0.165081	-0.148197	-0.181992
1	Lim	Snohomish	30	-0.166642	-0.14906	-0.183959
1	Lim	Snohomish	31	-0.166312	-0.149681	-0.183153
1	Lim	Spokane	1	-0.0043882	-0.0038273	-0.0049842
1	Lim	Spokane	2	-0.0087864	-0.0076453	-0.0100253
1	Lim	Spokane	3	-0.0132874	-0.0114622	-0.0151587
1	Lim	Spokane	4	-0.0177447	-0.0153333	-0.0202374
1	Lim	Spokane	5	-0.0223511	-0.0190199	-0.0251074
1	Lim	Spokane	6	-0.0267324	-0.0229823	-0.0304398
1	Lim	Spokane	7	-0.0313491	-0.0272404	-0.0352984
1	Lim	Spokane	8	-0.0358989	-0.0311949	-0.0409024
1	Lim	Spokane	9	-0.0405571	-0.0347166	-0.0459977
1	Lim	Spokane	10	-0.0450517	-0.0389423	-0.0513177
1	Lim	Spokane	11	-0.0453153	-0.0393468	-0.0511356
1	Lim	Spokane	12	-0.0456147	-0.0397282	-0.0516286
1	Lim	Spokane	13	-0.0458304	-0.0396771	-0.051732
1	Lim	Spokane	14	-0.0458323	-0.0398183	-0.0521363
1	Lim	Spokane	15	-0.0460953	-0.0397677	-0.0521821
1	Lim	Spokane	16	-0.0463971	-0.0402098	-0.0529423
1	Lim	Spokane	17	-0.0465966	-0.0398597	-0.0529833
1	Lim	Spokane	18	-0.0468541	-0.0403129	-0.0536762
1	Lim	Spokane	19	-0.0468516	-0.0400944	-0.0535493
1	Lim	Spokane	20	-0.0471848	-0.0404721	-0.0540958
1	Lim	Spokane	21	-0.0471332	-0.0408474	-0.0540208
1	Lim	Spokane	22	-0.0471707	-0.0407618	-0.0542538
1	Lim	Spokane	23	-0.0474018	-0.040336	-0.0541157
1	Lim	Spokane	24	-0.0474031	-0.0406506	-0.0540608
1	Lim	Spokane	25	-0.0474434	-0.0408902	-0.05442
1	Lim	Spokane	26	-0.0475841	-0.0411388	-0.0549204
1	Lim	Spokane	27	-0.047857	-0.0404804	-0.0549827
1	Lim	Spokane	28	-0.0477631	-0.0408194	-0.0547794
1	Lim	Spokane	29	-0.047965	-0.040878	-0.0551268
1	Lim	Spokane	30	-0.0481621	-0.0409632	-0.0555067
1	Lim	Spokane	31	-0.0479297	-0.0410936	-0.0553569
1	Lim	Stevens	1	-0.0129722	-0.0114463	-0.014515
1	Lim	Stevens	2	-0.0260648	-0.0230237	-0.0290198
1	Lim	Stevens	3	-0.039159	-0.0343639	-0.0438088
1	Lim	Stevens	4	-0.0523392	-0.0459965	-0.0584082
1	Lim	Stevens	5	-0.0655699	-0.057739	-0.0737257
1	Lim	Stevens	6	-0.0792628	-0.0696136	-0.0884302
1	Lim	Stevens	7	-0.0923145	-0.0813281	-0.103613
1	Lim	Stevens	8	-0.106123	-0.0924711	-0.11888
1	Lim	Stevens	9	-0.1192	-0.105054	-0.135008
1	Lim	Stevens	10	-0.132708	-0.116163	-0.149147
1	Lim	Stevens	11	-0.133949	-0.118157	-0.150203
1	Lim	Stevens	12	-0.135613	-0.11648	-0.152493
1	Lim	Stevens	13	-0.134849	-0.118302	-0.152687
1	Lim	Stevens	14	-0.13519	-0.11775	-0.15425
1	Lim	Stevens	15	-0.136758	-0.117739	-0.154749
1	Lim	Stevens	16	-0.137396	-0.120322	-0.155137
1	Lim	Stevens	17	-0.138264	-0.120452	-0.156728
1	Lim	Stevens	18	-0.139189	-0.120286	-0.157613
1	Lim	Stevens	19	-0.139047	-0.119492	-0.158073
1	Lim	Stevens	20	-0.139867	-0.119261	-0.159965
1	Lim	Stevens	21	-0.139866	-0.119886	-0.158356
1	Lim	Stevens	22	-0.140849	-0.120689	-0.161495
1	Lim	Stevens	23	-0.141375	-0.121541	-0.160965
1	Lim	Stevens	24	-0.141239	-0.120869	-0.162467
1	Lim	Stevens	25	-0.141737	-0.12192	-0.161972
1	Lim	Stevens	26	-0.141899	-0.120674	-0.161969
1	Lim	Stevens	27	-0.142848	-0.120734	-0.163631
1	Lim	Stevens	28	-0.142812	-0.122796	-0.164594
1	Lim	Stevens	29	-0.142951	-0.121289	-0.162913
1	Lim	Stevens	30	-0.143742	-0.122861	-0.165299
1	Lim	Stevens	31	-0.142692	-0.121433	-0.165545
1	Lim	Thurston	1	-0.016377	-0.0138526	-0.0188802
1	Lim	Thurston	2	-0.0325986	-0.0277677	-0.0377624
1	Lim	Thurston	3	-0.0490705	-0.0419734	-0.0569836
1	Lim	Thurston	4	-0.066223	-0.0562761	-0.0761924
1	Lim	Thurston	5	-0.0827562	-0.0703899	-0.0966452
1	Lim	Thurston	6	-0.100337	-0.0847247	-0.115505
1	Lim	Thurston	7	-0.117034	-0.0996995	-0.135195
1	Lim	Thurston	8	-0.135126	-0.115773	-0.155165
1	Lim	Thurston	9	-0.152477	-0.129433	-0.175793
1	Lim	Thurston	10	-0.168969	-0.144141	-0.193251
1	Lim	Thurston	11	-0.171894	-0.144008	-0.19562
1	Lim	Thurston	12	-0.172359	-0.148185	-0.197228
1	Lim	Thurston	13	-0.172882	-0.149395	-0.197821
1	Lim	Thurston	14	-0.17458	-0.149491	-0.200829
1	Lim	Thurston	15	-0.175321	-0.150485	-0.201919
1	Lim	Thurston	16	-0.17657	-0.151766	-0.203665
1	Lim	Thurston	17	-0.177053	-0.15355	-0.204389
1	Lim	Thurston	18	-0.178326	-0.151734	-0.201818
1	Lim	Thurston	19	-0.178944	-0.154501	-0.206388
1	Lim	Thurston	20	-0.181862	-0.156929	-0.207795
1	Lim	Thurston	21	-0.182135	-0.156449	-0.208875
1	Lim	Thurston	22	-0.184021	-0.157287	-0.209381
1	Lim	Thurston	23	-0.184751	-0.157224	-0.208305
1	Lim	Thurston	24	-0.184541	-0.158607	-0.209522
1	Lim	Thurston	25	-0.185763	-0.160031	-0.211312
1	Lim	Thurston	26	-0.184901	-0.158985	-0.210248
1	Lim	Thurston	27	-0.186484	-0.159609	-0.2153
1	Lim	Thurston	28	-0.185687	-0.160614	-0.212892
1	Lim	Thurston	29	-0.187494	-0.162179	-0.214088
1	Lim	Thurston	30	-0.188044	-0.163642	-0.213528
1	Lim	Thurston	31	-0.188961	-0.161812	-0.214262
1	Lim	Wahkiakum	1	-0.0077302	-0.0069515	-0.0085272
1	Lim	Wahkiakum	2	-0.0156089	-0.0139137	-0.0171498
1	Lim	Wahkiakum	3	-0.0235459	-0.020914	-0.0260529
1	Lim	Wahkiakum	4	-0.0314084	-0.0276933	-0.0346537
1	Lim	Wahkiakum	5	-0.0394347	-0.0351228	-0.0441897
1	Lim	Wahkiakum	6	-0.0476232	-0.0424769	-0.0525964
1	Lim	Wahkiakum	7	-0.0558267	-0.0498839	-0.0616389
1	Lim	Wahkiakum	8	-0.0640943	-0.0577713	-0.0703812
1	Lim	Wahkiakum	9	-0.0726279	-0.065337	-0.0799321
1	Lim	Wahkiakum	10	-0.081506	-0.0723802	-0.0895072
1	Lim	Wahkiakum	11	-0.0815003	-0.0735488	-0.0900927
1	Lim	Wahkiakum	12	-0.0821203	-0.0733664	-0.0907903
1	Lim	Wahkiakum	13	-0.083	-0.0743904	-0.0915128
1	Lim	Wahkiakum	14	-0.0836217	-0.0752227	-0.0922445
1	Lim	Wahkiakum	15	-0.0842112	-0.0757894	-0.0928081
1	Lim	Wahkiakum	16	-0.0849584	-0.0753138	-0.09344
1	Lim	Wahkiakum	17	-0.0853056	-0.0763006	-0.0941348
1	Lim	Wahkiakum	18	-0.0855708	-0.0770896	-0.0946471
1	Lim	Wahkiakum	19	-0.0863453	-0.0777829	-0.0952308
1	Lim	Wahkiakum	20	-0.0867251	-0.0773628	-0.0959852
1	Lim	Wahkiakum	21	-0.0872039	-0.0786428	-0.0965227
1	Lim	Wahkiakum	22	-0.0875569	-0.0789559	-0.0962098
1	Lim	Wahkiakum	23	-0.0880536	-0.0784885	-0.0968427
1	Lim	Wahkiakum	24	-0.0886714	-0.0792795	-0.0978861
1	Lim	Wahkiakum	25	-0.0890006	-0.0803391	-0.0980082
1	Lim	Wahkiakum	26	-0.0893651	-0.0807888	-0.0981164
1	Lim	Wahkiakum	27	-0.0896759	-0.0800222	-0.0985239
1	Lim	Wahkiakum	28	-0.089801	-0.0807533	-0.099119
1	Lim	Wahkiakum	29	-0.0902071	-0.0810032	-0.0996522
1	Lim	Wahkiakum	30	-0.0904609	-0.0816265	-0.0998837
1	Lim	Wahkiakum	31	-0.0904372	-0.0816095	-0.100259
1	Lim	Walla Walla	1	-0.0012973	-0.0009382	-0.0016673
1	Lim	Walla Walla	2	-0.0026581	-0.0019301	-0.003398
1	Lim	Walla Walla	3	-0.0040516	-0.0028914	-0.0051673
1	Lim	Walla Walla	4	-0.0054695	-0.0039829	-0.0069103
1	Lim	Walla Walla	5	-0.0070493	-0.0050679	-0.0088361
1	Lim	Walla Walla	6	-0.0085362	-0.0061289	-0.0108876
1	Lim	Walla Walla	7	-0.0100982	-0.007097	-0.012904
1	Lim	Walla Walla	8	-0.0115133	-0.0083585	-0.0150833
1	Lim	Walla Walla	9	-0.0131711	-0.0092704	-0.0167219
1	Lim	Walla Walla	10	-0.0150392	-0.0107826	-0.0190203
1	Lim	Walla Walla	11	-0.0152367	-0.0106937	-0.0196466
1	Lim	Walla Walla	12	-0.0155274	-0.0107622	-0.0202561
1	Lim	Walla Walla	13	-0.0156806	-0.0109528	-0.0210882
1	Lim	Walla Walla	14	-0.0162204	-0.0110782	-0.0213966
1	Lim	Walla Walla	15	-0.0163859	-0.0112539	-0.021565
1	Lim	Walla Walla	16	-0.0167906	-0.0115963	-0.0223816
1	Lim	Walla Walla	17	-0.017067	-0.0115099	-0.0226954
1	Lim	Walla Walla	18	-0.0175027	-0.0115829	-0.0230907
1	Lim	Walla Walla	19	-0.0177252	-0.0116634	-0.0238206
1	Lim	Walla Walla	20	-0.0178842	-0.0116225	-0.0242886
1	Lim	Walla Walla	21	-0.0182913	-0.0117931	-0.024572
1	Lim	Walla Walla	22	-0.0182563	-0.0118008	-0.0248806
1	Lim	Walla Walla	23	-0.0184023	-0.011706	-0.0248414
1	Lim	Walla Walla	24	-0.018635	-0.0119238	-0.0255156
1	Lim	Walla Walla	25	-0.0186021	-0.0117161	-0.02587
1	Lim	Walla Walla	26	-0.0187109	-0.0120631	-0.0258857
1	Lim	Walla Walla	27	-0.0192898	-0.0122064	-0.0266647
1	Lim	Walla Walla	28	-0.0193871	-0.0116855	-0.0263226
1	Lim	Walla Walla	29	-0.0194977	-0.012169	-0.0264019
1	Lim	Walla Walla	30	-0.0195219	-0.0121908	-0.0272196
1	Lim	Walla Walla	31	-0.019768	-0.0119956	-0.0282866
1	Lim	Whatcom	1	-0.0070486	-0.0061396	-0.0079219
1	Lim	Whatcom	2	-0.0141315	-0.0123946	-0.0158357
1	Lim	Whatcom	3	-0.0212878	-0.0189011	-0.0238325
1	Lim	Whatcom	4	-0.0286775	-0.0252639	-0.0323984
1	Lim	Whatcom	5	-0.0359978	-0.0318876	-0.0401701
1	Lim	Whatcom	6	-0.0434093	-0.0382371	-0.048266
1	Lim	Whatcom	7	-0.0509032	-0.0446713	-0.057095
1	Lim	Whatcom	8	-0.0583562	-0.0520795	-0.0653782
1	Lim	Whatcom	9	-0.0662346	-0.0585084	-0.0730084
1	Lim	Whatcom	10	-0.0739308	-0.0658329	-0.0821756
1	Lim	Whatcom	11	-0.0744241	-0.0655646	-0.0827613
1	Lim	Whatcom	12	-0.0750785	-0.0663445	-0.0838966
1	Lim	Whatcom	13	-0.075485	-0.0665052	-0.0842018
1	Lim	Whatcom	14	-0.0760328	-0.0677682	-0.0848841
1	Lim	Whatcom	15	-0.0766265	-0.067912	-0.0846784
1	Lim	Whatcom	16	-0.0772027	-0.068391	-0.0857724
1	Lim	Whatcom	17	-0.0773677	-0.0680384	-0.0858738
1	Lim	Whatcom	18	-0.0780672	-0.0690409	-0.0866407
1	Lim	Whatcom	19	-0.078305	-0.0698012	-0.0868744
1	Lim	Whatcom	20	-0.0788839	-0.0700545	-0.0883883
1	Lim	Whatcom	21	-0.0790723	-0.0698894	-0.087981
1	Lim	Whatcom	22	-0.0791693	-0.0707213	-0.08852
1	Lim	Whatcom	23	-0.07963	-0.0704036	-0.0891993
1	Lim	Whatcom	24	-0.0801538	-0.0716403	-0.0896835
1	Lim	Whatcom	25	-0.0803345	-0.0715575	-0.0901007
1	Lim	Whatcom	26	-0.0810503	-0.0720443	-0.0899307
1	Lim	Whatcom	27	-0.081299	-0.0718006	-0.0907184
1	Lim	Whatcom	28	-0.0812766	-0.0722361	-0.0909277
1	Lim	Whatcom	29	-0.0815045	-0.0731349	-0.0906368
1	Lim	Whatcom	30	-0.0817047	-0.0726788	-0.0910111
1	Lim	Whatcom	31	-0.081839	-0.0731681	-0.0918258
1	Lim	Whitman	1	-0.0008619	-0.0004509	-0.0012383
1	Lim	Whitman	2	-0.001678	-0.0009167	-0.0024832
1	Lim	Whitman	3	-0.0025772	-0.0013565	-0.0037691
1	Lim	Whitman	4	-0.0035123	-0.0018996	-0.0050467
1	Lim	Whitman	5	-0.0043296	-0.0023763	-0.0063209
1	Lim	Whitman	6	-0.0052657	-0.0029201	-0.0077018
1	Lim	Whitman	7	-0.006228	-0.0034681	-0.0090309
1	Lim	Whitman	8	-0.0069836	-0.0039826	-0.0102981
1	Lim	Whitman	9	-0.0078742	-0.0044714	-0.0115234
1	Lim	Whitman	10	-0.0087816	-0.004937	-0.0128827
1	Lim	Whitman	11	-0.009188	-0.0051727	-0.0130969
1	Lim	Whitman	12	-0.0094029	-0.0053168	-0.0133173
1	Lim	Whitman	13	-0.009289	-0.0052144	-0.0135027
1	Lim	Whitman	14	-0.0095087	-0.00551	-0.0135347
1	Lim	Whitman	15	-0.0095116	-0.0052889	-0.0139019
1	Lim	Whitman	16	-0.0099335	-0.0055305	-0.0140194
1	Lim	Whitman	17	-0.0097052	-0.0054695	-0.014232
1	Lim	Whitman	18	-0.0097589	-0.0056323	-0.0142414
1	Lim	Whitman	19	-0.0096247	-0.0054409	-0.0142865
1	Lim	Whitman	20	-0.0100585	-0.0058134	-0.0143494
1	Lim	Whitman	21	-0.0103175	-0.0056935	-0.0144813
1	Lim	Whitman	22	-0.0105404	-0.0056457	-0.0149967
1	Lim	Whitman	23	-0.0106857	-0.0059417	-0.0147128
1	Lim	Whitman	24	-0.0099519	-0.005872	-0.0150256
1	Lim	Whitman	25	-0.0102252	-0.0056424	-0.0151936
1	Lim	Whitman	26	-0.0106181	-0.0059069	-0.0150517
1	Lim	Whitman	27	-0.0104127	-0.0058497	-0.0151154
1	Lim	Whitman	28	-0.0107956	-0.0058979	-0.0154526
1	Lim	Whitman	29	-0.01052	-0.005953	-0.0151149
1	Lim	Whitman	30	-0.0104377	-0.0058522	-0.0153712
1	Lim	Whitman	31	-0.0108641	-0.0058907	-0.0152108
1	Lim	Yakima	1	-0.0085666	-0.0077372	-0.0093723
1	Lim	Yakima	2	-0.0172237	-0.0155099	-0.0187066
1	Lim	Yakima	3	-0.0259176	-0.0233641	-0.028248
1	Lim	Yakima	4	-0.034636	-0.0312031	-0.0378255
1	Lim	Yakima	5	-0.0434818	-0.0388809	-0.0474521
1	Lim	Yakima	6	-0.0522653	-0.0475432	-0.0571488
1	Lim	Yakima	7	-0.0607315	-0.054858	-0.0664968
1	Lim	Yakima	8	-0.06998	-0.0630515	-0.0770009
1	Lim	Yakima	9	-0.0790026	-0.0709358	-0.0869049
1	Lim	Yakima	10	-0.0879743	-0.079383	-0.0962803
1	Lim	Yakima	11	-0.0884874	-0.080093	-0.0970517
1	Lim	Yakima	12	-0.0892553	-0.0807569	-0.0982616
1	Lim	Yakima	13	-0.0896253	-0.0809244	-0.098215
1	Lim	Yakima	14	-0.089931	-0.0807409	-0.0984546
1	Lim	Yakima	15	-0.0907129	-0.0815382	-0.099322
1	Lim	Yakima	16	-0.0905777	-0.0817138	-0.0996332
1	Lim	Yakima	17	-0.0912529	-0.0819621	-0.100259
1	Lim	Yakima	18	-0.0915005	-0.081992	-0.100936
1	Lim	Yakima	19	-0.091982	-0.0826039	-0.10159
1	Lim	Yakima	20	-0.092426	-0.0830607	-0.101905
1	Lim	Yakima	21	-0.091985	-0.0819347	-0.101456
1	Lim	Yakima	22	-0.0927087	-0.0831424	-0.103025
1	Lim	Yakima	23	-0.0928804	-0.0829391	-0.102979
1	Lim	Yakima	24	-0.0934228	-0.082948	-0.103275
1	Lim	Yakima	25	-0.0935127	-0.0829864	-0.103261
1	Lim	Yakima	26	-0.0933716	-0.0838892	-0.103613
1	Lim	Yakima	27	-0.0940501	-0.0837634	-0.104428
1	Lim	Yakima	28	-0.0939357	-0.0830534	-0.104845
1	Lim	Yakima	29	-0.094425	-0.0834141	-0.105285
1	Lim	Yakima	30	-0.0944211	-0.0833577	-0.105746
1	Lim	Yakima	31	-0.0946357	-0.0834558	-0.10572
2	Amb	Adams	1	-0.0077334	-0.0056501	-0.0097271
2	Amb	Adams	2	-0.0152079	-0.0113436	-0.019104
2	Amb	Adams	3	-0.0227445	-0.0168481	-0.0289469
2	Amb	Adams	4	-0.0309177	-0.0231262	-0.0389534
2	Amb	Adams	5	-0.0385022	-0.0287674	-0.0481441
2	Amb	Adams	6	-0.0461032	-0.0344141	-0.057586
2	Amb	Adams	7	-0.0535845	-0.0398346	-0.0686342
2	Amb	Adams	8	-0.0614239	-0.0451327	-0.0775364
2	Amb	Adams	9	-0.0689852	-0.0504715	-0.0860968
2	Amb	Adams	10	-0.0765163	-0.0573974	-0.0968503
2	Amb	Adams	11	-0.0801877	-0.05922	-0.103538
2	Amb	Adams	12	-0.0856251	-0.0627415	-0.106154
2	Amb	Adams	13	-0.0886976	-0.0661455	-0.111531
2	Amb	Adams	14	-0.0907188	-0.0687233	-0.114774
2	Amb	Adams	15	-0.0966675	-0.0718892	-0.120715
2	Amb	Adams	16	-0.100681	-0.0753925	-0.127688
2	Amb	Adams	17	-0.104194	-0.0745337	-0.132962
2	Amb	Adams	18	-0.107967	-0.0789604	-0.137775
2	Amb	Adams	19	-0.112714	-0.0830204	-0.143651
2	Amb	Adams	20	-0.116403	-0.0866557	-0.14658
2	Amb	Adams	21	-0.120929	-0.090287	-0.151756
2	Amb	Adams	22	-0.125731	-0.0923587	-0.157446
2	Amb	Adams	23	-0.129375	-0.0938172	-0.162927
2	Amb	Adams	24	-0.132554	-0.0957458	-0.168706
2	Amb	Adams	25	-0.137752	-0.0996095	-0.172509
2	Amb	Adams	26	-0.141455	-0.103218	-0.179863
2	Amb	Adams	27	-0.143265	-0.105721	-0.185139
2	Amb	Adams	28	-0.14839	-0.108235	-0.186914
2	Amb	Adams	29	-0.152152	-0.109407	-0.192891
2	Amb	Adams	30	-0.155732	-0.113766	-0.197818
2	Amb	Adams	31	-0.161882	-0.116279	-0.20146
2	Amb	Asotin	1	-0.0051756	-0.0045898	-0.0057683
2	Amb	Asotin	2	-0.0067441	-0.00594	-0.0075201
2	Amb	Asotin	3	-0.0085807	-0.0075917	-0.0095393
2	Amb	Asotin	4	-0.0105884	-0.0093871	-0.0118227
2	Amb	Asotin	5	-0.012673	-0.0110802	-0.014088
2	Amb	Asotin	6	-0.0134781	-0.0117852	-0.0150997
2	Amb	Asotin	7	-0.0142996	-0.0125047	-0.016178
2	Amb	Asotin	8	-0.0151233	-0.0129767	-0.0171395
2	Amb	Asotin	9	-0.0158823	-0.0136676	-0.0180578
2	Amb	Asotin	10	-0.0167664	-0.0143462	-0.0190743
2	Amb	Asotin	11	-0.0172219	-0.0146281	-0.0198034
2	Amb	Asotin	12	-0.0176636	-0.0150788	-0.0204075
2	Amb	Asotin	13	-0.0183091	-0.0155086	-0.0210265
2	Amb	Asotin	14	-0.0187152	-0.0158083	-0.0219252
2	Amb	Asotin	15	-0.0192457	-0.0160749	-0.022526
2	Amb	Asotin	16	-0.0197969	-0.0166828	-0.0229699
2	Amb	Asotin	17	-0.0203074	-0.0170264	-0.02375
2	Amb	Asotin	18	-0.0208836	-0.0172943	-0.0243582
2	Amb	Asotin	19	-0.0215647	-0.0178846	-0.0250288
2	Amb	Asotin	20	-0.0218081	-0.0184069	-0.0254175
2	Amb	Asotin	21	-0.0224569	-0.018724	-0.0262777
2	Amb	Asotin	22	-0.0231655	-0.0190999	-0.0272877
2	Amb	Asotin	23	-0.0237	-0.0197726	-0.0281143
2	Amb	Asotin	24	-0.0241861	-0.0201851	-0.0283366
2	Amb	Asotin	25	-0.024947	-0.0207024	-0.0293084
2	Amb	Asotin	26	-0.0255045	-0.0209331	-0.0297894
2	Amb	Asotin	27	-0.0260883	-0.0216162	-0.0307009
2	Amb	Asotin	28	-0.0266804	-0.0220766	-0.031476
2	Amb	Asotin	29	-0.0274152	-0.0227388	-0.0323498
2	Amb	Asotin	30	-0.0279829	-0.0228107	-0.0331217
2	Amb	Asotin	31	-0.0285518	-0.0239651	-0.0336016
2	Amb	Benton	1	-0.006379	-0.004548	-0.0082844
2	Amb	Benton	2	-0.0128622	-0.0090711	-0.0166971
2	Amb	Benton	3	-0.0196479	-0.013859	-0.0250503
2	Amb	Benton	4	-0.0258692	-0.0185984	-0.0336767
2	Amb	Benton	5	-0.0323122	-0.0231737	-0.0423315
2	Amb	Benton	6	-0.0393939	-0.0274684	-0.0502748
2	Amb	Benton	7	-0.0457626	-0.0327493	-0.0587071
2	Amb	Benton	8	-0.0521648	-0.0373675	-0.0678878
2	Amb	Benton	9	-0.0602904	-0.0420694	-0.0770905
2	Amb	Benton	10	-0.0662082	-0.0471762	-0.0839855
2	Amb	Benton	11	-0.0676142	-0.0492209	-0.0883104
2	Amb	Benton	12	-0.0705587	-0.0505695	-0.0902462
2	Amb	Benton	13	-0.0717961	-0.0530171	-0.0915444
2	Amb	Benton	14	-0.0746078	-0.0545835	-0.0935613
2	Amb	Benton	15	-0.0758577	-0.0550845	-0.0971223
2	Amb	Benton	16	-0.0773733	-0.0582198	-0.0988181
2	Amb	Benton	17	-0.0787615	-0.0589701	-0.102022
2	Amb	Benton	18	-0.0831426	-0.0608238	-0.104485
2	Amb	Benton	19	-0.0860326	-0.0626151	-0.10589
2	Amb	Benton	20	-0.0858001	-0.0633103	-0.107531
2	Amb	Benton	21	-0.0883918	-0.0647073	-0.11053
2	Amb	Benton	22	-0.0907176	-0.0683668	-0.112678
2	Amb	Benton	23	-0.0914484	-0.0695531	-0.114714
2	Amb	Benton	24	-0.0932786	-0.0694572	-0.118635
2	Amb	Benton	25	-0.0975258	-0.0728277	-0.120858
2	Amb	Benton	26	-0.098467	-0.0749512	-0.124197
2	Amb	Benton	27	-0.0997848	-0.0750592	-0.126071
2	Amb	Benton	28	-0.1019	-0.0759886	-0.130167
2	Amb	Benton	29	-0.10408	-0.0781352	-0.131905
2	Amb	Benton	30	-0.105938	-0.080303	-0.132503
2	Amb	Benton	31	-0.107873	-0.081548	-0.132951
2	Amb	Chelan	1	-0.002421	-0.0013123	-0.0069736
2	Amb	Chelan	2	-0.0060516	-0.0030869	-0.0109928
2	Amb	Chelan	3	-0.0095339	-0.0059639	-0.0144113
2	Amb	Chelan	4	-0.0124899	-0.0089806	-0.0178227
2	Amb	Chelan	5	-0.0152319	-0.0111208	-0.0214681
2	Amb	Chelan	6	-0.0183509	-0.0131795	-0.0238902
2	Amb	Chelan	7	-0.0207732	-0.0152366	-0.026854
2	Amb	Chelan	8	-0.0233722	-0.0173411	-0.0296921
2	Amb	Chelan	9	-0.0259583	-0.0196594	-0.0326853
2	Amb	Chelan	10	-0.0271412	-0.0202598	-0.0343929
2	Amb	Chelan	11	-0.0266099	-0.019917	-0.0350589
2	Amb	Chelan	12	-0.0268684	-0.0198745	-0.0345367
2	Amb	Chelan	13	-0.0270179	-0.0199877	-0.0347136
2	Amb	Chelan	14	-0.0270129	-0.0199083	-0.0348451
2	Amb	Chelan	15	-0.027426	-0.0200857	-0.0355697
2	Amb	Chelan	16	-0.0289024	-0.0215255	-0.0378552
2	Amb	Chelan	17	-0.0306074	-0.0220869	-0.0390291
2	Amb	Chelan	18	-0.0324381	-0.0242932	-0.0413587
2	Amb	Chelan	19	-0.0335586	-0.0259853	-0.0421447
2	Amb	Chelan	20	-0.0351428	-0.0272192	-0.0446716
2	Amb	Chelan	21	-0.0364738	-0.027563	-0.0462676
2	Amb	Chelan	22	-0.037918	-0.0289436	-0.046466
2	Amb	Chelan	23	-0.0391529	-0.0314412	-0.0488818
2	Amb	Chelan	24	-0.0401248	-0.0323535	-0.049556
2	Amb	Chelan	25	-0.0405149	-0.0320521	-0.0500486
2	Amb	Chelan	26	-0.0416463	-0.0331101	-0.0503557
2	Amb	Chelan	27	-0.0427563	-0.0345018	-0.0513473
2	Amb	Chelan	28	-0.0428566	-0.0347463	-0.052198
2	Amb	Chelan	29	-0.0437258	-0.035048	-0.0535207
2	Amb	Chelan	30	-0.0448328	-0.0359391	-0.0536185
2	Amb	Chelan	31	-0.0454477	-0.0372767	-0.0538603
2	Amb	Clallam	1	-0.125854	-0.104587	-0.148083
2	Amb	Clallam	2	-0.153384	-0.12659	-0.181537
2	Amb	Clallam	3	-0.186025	-0.15367	-0.221112
2	Amb	Clallam	4	-0.219421	-0.177423	-0.259227
2	Amb	Clallam	5	-0.25667	-0.21037	-0.304017
2	Amb	Clallam	6	-0.279141	-0.22793	-0.330943
2	Amb	Clallam	7	-0.28604	-0.237739	-0.33617
2	Amb	Clallam	8	-0.290113	-0.236731	-0.343175
2	Amb	Clallam	9	-0.29648	-0.243446	-0.349066
2	Amb	Clallam	10	-0.303716	-0.251179	-0.355815
2	Amb	Clallam	11	-0.304708	-0.254388	-0.361278
2	Amb	Clallam	12	-0.30464	-0.253164	-0.356275
2	Amb	Clallam	13	-0.310862	-0.260222	-0.363409
2	Amb	Clallam	14	-0.311626	-0.260623	-0.36675
2	Amb	Clallam	15	-0.313233	-0.260653	-0.36616
2	Amb	Clallam	16	-0.316863	-0.265227	-0.373663
2	Amb	Clallam	17	-0.321837	-0.265724	-0.373342
2	Amb	Clallam	18	-0.321968	-0.271639	-0.373451
2	Amb	Clallam	19	-0.323708	-0.271104	-0.379726
2	Amb	Clallam	20	-0.324819	-0.274611	-0.379458
2	Amb	Clallam	21	-0.329337	-0.27395	-0.380315
2	Amb	Clallam	22	-0.329862	-0.280682	-0.385612
2	Amb	Clallam	23	-0.332238	-0.279342	-0.385019
2	Amb	Clallam	24	-0.335888	-0.280291	-0.391547
2	Amb	Clallam	25	-0.339239	-0.285602	-0.393159
2	Amb	Clallam	26	-0.340189	-0.285582	-0.39128
2	Amb	Clallam	27	-0.342781	-0.28889	-0.39726
2	Amb	Clallam	28	-0.34636	-0.296352	-0.400124
2	Amb	Clallam	29	-0.348215	-0.295078	-0.402369
2	Amb	Clallam	30	-0.352107	-0.292341	-0.406172
2	Amb	Clallam	31	-0.355786	-0.300474	-0.414217
2	Amb	Clark	1	-0.0703261	-0.0624793	-0.0782046
2	Amb	Clark	2	-0.0910296	-0.080449	-0.102286
2	Amb	Clark	3	-0.107731	-0.0940156	-0.120464
2	Amb	Clark	4	-0.12418	-0.108031	-0.140588
2	Amb	Clark	5	-0.132787	-0.114888	-0.152611
2	Amb	Clark	6	-0.141558	-0.121437	-0.163601
2	Amb	Clark	7	-0.14987	-0.127977	-0.173732
2	Amb	Clark	8	-0.157854	-0.13191	-0.184553
2	Amb	Clark	9	-0.166676	-0.137533	-0.19399
2	Amb	Clark	10	-0.175103	-0.143077	-0.204482
2	Amb	Clark	11	-0.176797	-0.144564	-0.208287
2	Amb	Clark	12	-0.17578	-0.14442	-0.208887
2	Amb	Clark	13	-0.177933	-0.145246	-0.209681
2	Amb	Clark	14	-0.179655	-0.147687	-0.210696
2	Amb	Clark	15	-0.181268	-0.149034	-0.212336
2	Amb	Clark	16	-0.17977	-0.147895	-0.210197
2	Amb	Clark	17	-0.182406	-0.14946	-0.214344
2	Amb	Clark	18	-0.18315	-0.152702	-0.214919
2	Amb	Clark	19	-0.183927	-0.153312	-0.214193
2	Amb	Clark	20	-0.184826	-0.152832	-0.2184
2	Amb	Clark	21	-0.18639	-0.152814	-0.219534
2	Amb	Clark	22	-0.186586	-0.154654	-0.218005
2	Amb	Clark	23	-0.187817	-0.155235	-0.220916
2	Amb	Clark	24	-0.189157	-0.15728	-0.219901
2	Amb	Clark	25	-0.189807	-0.156187	-0.222304
2	Amb	Clark	26	-0.192043	-0.163026	-0.224843
2	Amb	Clark	27	-0.192482	-0.161461	-0.223136
2	Amb	Clark	28	-0.193615	-0.161425	-0.228372
2	Amb	Clark	29	-0.194901	-0.16637	-0.22668
2	Amb	Clark	30	-0.196992	-0.164212	-0.229484
2	Amb	Clark	31	-0.197738	-0.165948	-0.231466
2	Amb	Columbia	1	-0.0179532	-0.0150606	-0.0226719
2	Amb	Columbia	2	-0.0243992	-0.0204875	-0.0297785
2	Amb	Columbia	3	-0.0317152	-0.0265863	-0.0367729
2	Amb	Columbia	4	-0.0394607	-0.0342804	-0.0443387
2	Amb	Columbia	5	-0.0467945	-0.0404982	-0.0533717
2	Amb	Columbia	6	-0.0501142	-0.0429592	-0.0575498
2	Amb	Columbia	7	-0.0531875	-0.0460661	-0.0607528
2	Amb	Columbia	8	-0.0565656	-0.0497952	-0.0647478
2	Amb	Columbia	9	-0.0598776	-0.0516588	-0.068217
2	Amb	Columbia	10	-0.0624733	-0.0536835	-0.0713973
2	Amb	Columbia	11	-0.0640416	-0.0546873	-0.0738259
2	Amb	Columbia	12	-0.0657592	-0.0563546	-0.0748763
2	Amb	Columbia	13	-0.0669313	-0.0575417	-0.0765199
2	Amb	Columbia	14	-0.068239	-0.0587534	-0.0783003
2	Amb	Columbia	15	-0.0698511	-0.059919	-0.0799274
2	Amb	Columbia	16	-0.0738743	-0.0630175	-0.0848671
2	Amb	Columbia	17	-0.0780083	-0.0665907	-0.090818
2	Amb	Columbia	18	-0.0820935	-0.0704578	-0.095517
2	Amb	Columbia	19	-0.0854268	-0.074693	-0.0971085
2	Amb	Columbia	20	-0.0893794	-0.0771193	-0.102
2	Amb	Columbia	21	-0.093012	-0.0800549	-0.105997
2	Amb	Columbia	22	-0.0967034	-0.0844203	-0.110786
2	Amb	Columbia	23	-0.100362	-0.0884351	-0.113637
2	Amb	Columbia	24	-0.104092	-0.091319	-0.117986
2	Amb	Columbia	25	-0.1075	-0.0936455	-0.121224
2	Amb	Columbia	26	-0.109346	-0.0964887	-0.123443
2	Amb	Columbia	27	-0.112573	-0.0986872	-0.126255
2	Amb	Columbia	28	-0.115028	-0.101588	-0.129893
2	Amb	Columbia	29	-0.117427	-0.102442	-0.131617
2	Amb	Columbia	30	-0.119634	-0.105916	-0.134722
2	Amb	Columbia	31	-0.121991	-0.107361	-0.137471
2	Amb	Cowlitz	1	-0.101828	-0.0851539	-0.117676
2	Amb	Cowlitz	2	-0.127756	-0.108454	-0.147455
2	Amb	Cowlitz	3	-0.155886	-0.130894	-0.180271
2	Amb	Cowlitz	4	-0.188534	-0.157472	-0.218075
2	Amb	Cowlitz	5	-0.218467	-0.184565	-0.25077
2	Amb	Cowlitz	6	-0.254313	-0.21229	-0.295764
2	Amb	Cowlitz	7	-0.294268	-0.243775	-0.341788
2	Amb	Cowlitz	8	-0.34295	-0.282575	-0.404211
2	Amb	Cowlitz	9	-0.381402	-0.318818	-0.44721
2	Amb	Cowlitz	10	-0.391402	-0.326739	-0.461504
2	Amb	Cowlitz	11	-0.398355	-0.326675	-0.460401
2	Amb	Cowlitz	12	-0.397485	-0.330028	-0.466697
2	Amb	Cowlitz	13	-0.401638	-0.339085	-0.46706
2	Amb	Cowlitz	14	-0.406501	-0.336031	-0.475446
2	Amb	Cowlitz	15	-0.410183	-0.346567	-0.480981
2	Amb	Cowlitz	16	-0.412104	-0.35193	-0.477925
2	Amb	Cowlitz	17	-0.416064	-0.349971	-0.483999
2	Amb	Cowlitz	18	-0.419463	-0.347272	-0.488839
2	Amb	Cowlitz	19	-0.42548	-0.35717	-0.493488
2	Amb	Cowlitz	20	-0.425924	-0.357782	-0.494542
2	Amb	Cowlitz	21	-0.428453	-0.356668	-0.49925
2	Amb	Cowlitz	22	-0.432584	-0.365473	-0.501785
2	Amb	Cowlitz	23	-0.435783	-0.35905	-0.511671
2	Amb	Cowlitz	24	-0.437129	-0.362973	-0.506446
2	Amb	Cowlitz	25	-0.440349	-0.36774	-0.513718
2	Amb	Cowlitz	26	-0.445288	-0.373761	-0.515078
2	Amb	Cowlitz	27	-0.448871	-0.374561	-0.516115
2	Amb	Cowlitz	28	-0.451501	-0.383994	-0.524158
2	Amb	Cowlitz	29	-0.454631	-0.384787	-0.521274
2	Amb	Cowlitz	30	-0.452962	-0.386168	-0.525859
2	Amb	Cowlitz	31	-0.4596	-0.392537	-0.527186
2	Amb	Douglas	1	-0.0040225	-0.003104	-0.004984
2	Amb	Douglas	2	-0.0080226	-0.0061441	-0.0099422
2	Amb	Douglas	3	-0.0121351	-0.0091428	-0.0149525
2	Amb	Douglas	4	-0.0162228	-0.0125393	-0.020186
2	Amb	Douglas	5	-0.0205893	-0.0159255	-0.0254092
2	Amb	Douglas	6	-0.0246643	-0.0190879	-0.03052
2	Amb	Douglas	7	-0.0295081	-0.0223545	-0.0362478
2	Amb	Douglas	8	-0.0335072	-0.0254491	-0.0413594
2	Amb	Douglas	9	-0.038208	-0.0296555	-0.0463016
2	Amb	Douglas	10	-0.042007	-0.0322489	-0.0518914
2	Amb	Douglas	11	-0.0452025	-0.0342732	-0.0560164
2	Amb	Douglas	12	-0.0480282	-0.0368022	-0.0599774
2	Amb	Douglas	13	-0.0508356	-0.0387155	-0.063116
2	Amb	Douglas	14	-0.0545285	-0.0411364	-0.0673997
2	Amb	Douglas	15	-0.0573649	-0.0431415	-0.0709764
2	Amb	Douglas	16	-0.0601229	-0.0447535	-0.0748135
2	Amb	Douglas	17	-0.0629169	-0.0478597	-0.0781159
2	Amb	Douglas	18	-0.0659344	-0.0497343	-0.0818036
2	Amb	Douglas	19	-0.0688022	-0.0520768	-0.0867132
2	Amb	Douglas	20	-0.071948	-0.0539506	-0.0910001
2	Amb	Douglas	21	-0.07488	-0.056036	-0.093264
2	Amb	Douglas	22	-0.0777503	-0.0562619	-0.0973802
2	Amb	Douglas	23	-0.081796	-0.0599546	-0.102489
2	Amb	Douglas	24	-0.0833957	-0.0626403	-0.106451
2	Amb	Douglas	25	-0.0863953	-0.0620469	-0.108948
2	Amb	Douglas	26	-0.0898885	-0.065594	-0.112723
2	Amb	Douglas	27	-0.091956	-0.0695186	-0.115379
2	Amb	Douglas	28	-0.0961339	-0.0718531	-0.120888
2	Amb	Douglas	29	-0.0989008	-0.0708881	-0.125159
2	Amb	Douglas	30	-0.101044	-0.0730041	-0.127551
2	Amb	Douglas	31	-0.104386	-0.0747469	-0.132567
2	Amb	Ferry	1	-0.0009516	-0.0004786	-0.0016514
2	Amb	Ferry	2	-0.0019593	-0.0009821	-0.0030645
2	Amb	Ferry	3	-0.0029676	-0.0015408	-0.0044451
2	Amb	Ferry	4	-0.0040062	-0.0020843	-0.0058089
2	Amb	Ferry	5	-0.0049707	-0.0024161	-0.0073077
2	Amb	Ferry	6	-0.0059089	-0.0030506	-0.0086237
2	Amb	Ferry	7	-0.0067846	-0.0036537	-0.0099864
2	Amb	Ferry	8	-0.0077024	-0.0041828	-0.011467
2	Amb	Ferry	9	-0.0084042	-0.0045181	-0.0125719
2	Amb	Ferry	10	-0.0094577	-0.0053209	-0.0137787
2	Amb	Ferry	11	-0.0096799	-0.0053073	-0.0139761
2	Amb	Ferry	12	-0.0097131	-0.0052896	-0.0138714
2	Amb	Ferry	13	-0.0097034	-0.0050883	-0.0142313
2	Amb	Ferry	14	-0.009776	-0.0053589	-0.0144059
2	Amb	Ferry	15	-0.0098178	-0.0056512	-0.0143944
2	Amb	Ferry	16	-0.0102647	-0.0058937	-0.0145061
2	Amb	Ferry	17	-0.0103107	-0.0059888	-0.0149882
2	Amb	Ferry	18	-0.0106721	-0.0061286	-0.0152292
2	Amb	Ferry	19	-0.0109869	-0.0068726	-0.0153302
2	Amb	Ferry	20	-0.0112803	-0.006494	-0.0158225
2	Amb	Ferry	21	-0.0115239	-0.0072057	-0.0158909
2	Amb	Ferry	22	-0.0117392	-0.006864	-0.0161122
2	Amb	Ferry	23	-0.0119328	-0.0073852	-0.0164272
2	Amb	Ferry	24	-0.0122257	-0.0075169	-0.017038
2	Amb	Ferry	25	-0.0120877	-0.0079076	-0.016617
2	Amb	Ferry	26	-0.0124727	-0.0079248	-0.0172955
2	Amb	Ferry	27	-0.012478	-0.0081419	-0.01715
2	Amb	Ferry	28	-0.0126975	-0.0081416	-0.017372
2	Amb	Ferry	29	-0.0129379	-0.0084364	-0.0175545
2	Amb	Ferry	30	-0.0130403	-0.0085337	-0.017642
2	Amb	Ferry	31	-0.0132417	-0.0089569	-0.0179661
2	Amb	Franklin	1	-0.0062374	-0.0044191	-0.0079618
2	Amb	Franklin	2	-0.0124133	-0.0087785	-0.0157639
2	Amb	Franklin	3	-0.0188037	-0.0130347	-0.0238494
2	Amb	Franklin	4	-0.0247498	-0.0176335	-0.0320247
2	Amb	Franklin	5	-0.0306801	-0.021948	-0.0400402
2	Amb	Franklin	6	-0.0377371	-0.0268307	-0.0478616
2	Amb	Franklin	7	-0.043698	-0.0315978	-0.0556531
2	Amb	Franklin	8	-0.0500715	-0.035848	-0.0635468
2	Amb	Franklin	9	-0.0556862	-0.0393306	-0.0725414
2	Amb	Franklin	10	-0.0627708	-0.0454262	-0.0799126
2	Amb	Franklin	11	-0.0648813	-0.046798	-0.082712
2	Amb	Franklin	12	-0.0660983	-0.0481787	-0.0848056
2	Amb	Franklin	13	-0.0677977	-0.0499385	-0.086861
2	Amb	Franklin	14	-0.0710138	-0.0516365	-0.0903051
2	Amb	Franklin	15	-0.0722586	-0.0539076	-0.0920567
2	Amb	Franklin	16	-0.075919	-0.0550047	-0.0952931
2	Amb	Franklin	17	-0.0765628	-0.0567356	-0.0966504
2	Amb	Franklin	18	-0.0787241	-0.0602665	-0.099361
2	Amb	Franklin	19	-0.0819477	-0.061213	-0.10318
2	Amb	Franklin	20	-0.0830203	-0.0610493	-0.10371
2	Amb	Franklin	21	-0.0849987	-0.0637966	-0.105668
2	Amb	Franklin	22	-0.087755	-0.0656287	-0.110176
2	Amb	Franklin	23	-0.0896336	-0.0677128	-0.111808
2	Amb	Franklin	24	-0.0915062	-0.0695022	-0.115338
2	Amb	Franklin	25	-0.0941828	-0.0707314	-0.118081
2	Amb	Franklin	26	-0.0957891	-0.0729161	-0.12029
2	Amb	Franklin	27	-0.0987931	-0.0739049	-0.123178
2	Amb	Franklin	28	-0.099915	-0.0758104	-0.124825
2	Amb	Franklin	29	-0.101045	-0.0779198	-0.128318
2	Amb	Franklin	30	-0.103098	-0.0784062	-0.129339
2	Amb	Franklin	31	-0.106637	-0.0796162	-0.133005
2	Amb	Garfield	1	-0.0089485	-0.0073754	-0.0125853
2	Amb	Garfield	2	-0.012988	-0.0103317	-0.017583
2	Amb	Garfield	3	-0.0174619	-0.0140449	-0.022301
2	Amb	Garfield	4	-0.0220927	-0.0182051	-0.0274043
2	Amb	Garfield	5	-0.0264637	-0.021809	-0.0334734
2	Amb	Garfield	6	-0.0293348	-0.0239464	-0.0365114
2	Amb	Garfield	7	-0.0322321	-0.0265372	-0.0398757
2	Amb	Garfield	8	-0.0350013	-0.0288209	-0.0428662
2	Amb	Garfield	9	-0.0377921	-0.0309203	-0.0464751
2	Amb	Garfield	10	-0.040331	-0.0329983	-0.0492018
2	Amb	Garfield	11	-0.0413045	-0.0338677	-0.0507154
2	Amb	Garfield	12	-0.0426337	-0.0346826	-0.051579
2	Amb	Garfield	13	-0.0439002	-0.0357157	-0.0532354
2	Amb	Garfield	14	-0.0448591	-0.0366463	-0.0536615
2	Amb	Garfield	15	-0.0458829	-0.0374848	-0.0557404
2	Amb	Garfield	16	-0.0494748	-0.0399036	-0.0586467
2	Amb	Garfield	17	-0.0528162	-0.0425558	-0.0634353
2	Amb	Garfield	18	-0.0561093	-0.0457517	-0.0669135
2	Amb	Garfield	19	-0.0589868	-0.0485276	-0.0709914
2	Amb	Garfield	20	-0.0617028	-0.0509936	-0.0748309
2	Amb	Garfield	21	-0.0648432	-0.0527266	-0.0788827
2	Amb	Garfield	22	-0.0681462	-0.0564101	-0.081725
2	Amb	Garfield	23	-0.0709251	-0.0587586	-0.0841449
2	Amb	Garfield	24	-0.0731214	-0.0610165	-0.0867745
2	Amb	Garfield	25	-0.0764131	-0.0635473	-0.0909259
2	Amb	Garfield	26	-0.0777572	-0.0650149	-0.0928806
2	Amb	Garfield	27	-0.0800227	-0.06624	-0.0937142
2	Amb	Garfield	28	-0.0812298	-0.0682373	-0.0950865
2	Amb	Garfield	29	-0.0826547	-0.068145	-0.0974789
2	Amb	Garfield	30	-0.0845364	-0.0713249	-0.0988268
2	Amb	Garfield	31	-0.0861794	-0.0723401	-0.100978
2	Amb	Grant	1	-0.0127341	-0.008885	-0.0163429
2	Amb	Grant	2	-0.0252575	-0.0174017	-0.0326001
2	Amb	Grant	3	-0.0376006	-0.026513	-0.0487753
2	Amb	Grant	4	-0.0508153	-0.0359702	-0.0650282
2	Amb	Grant	5	-0.0634934	-0.0442294	-0.0816909
2	Amb	Grant	6	-0.0755707	-0.0540248	-0.0984906
2	Amb	Grant	7	-0.0898344	-0.0632104	-0.114997
2	Amb	Grant	8	-0.103886	-0.0711245	-0.129676
2	Amb	Grant	9	-0.113025	-0.0797173	-0.146177
2	Amb	Grant	10	-0.127087	-0.0901648	-0.163616
2	Amb	Grant	11	-0.128302	-0.093907	-0.16696
2	Amb	Grant	12	-0.134018	-0.0959551	-0.171497
2	Amb	Grant	13	-0.137223	-0.0991814	-0.176222
2	Amb	Grant	14	-0.142281	-0.101601	-0.181999
2	Amb	Grant	15	-0.145013	-0.103905	-0.183528
2	Amb	Grant	16	-0.148684	-0.107904	-0.188787
2	Amb	Grant	17	-0.151909	-0.111792	-0.193776
2	Amb	Grant	18	-0.153989	-0.112624	-0.194522
2	Amb	Grant	19	-0.157835	-0.117863	-0.200489
2	Amb	Grant	20	-0.162387	-0.118955	-0.204313
2	Amb	Grant	21	-0.168571	-0.122954	-0.209775
2	Amb	Grant	22	-0.170718	-0.126353	-0.212864
2	Amb	Grant	23	-0.173639	-0.12878	-0.217161
2	Amb	Grant	24	-0.174871	-0.132016	-0.221458
2	Amb	Grant	25	-0.17726	-0.134015	-0.22236
2	Amb	Grant	26	-0.184087	-0.140603	-0.228711
2	Amb	Grant	27	-0.186807	-0.138171	-0.233151
2	Amb	Grant	28	-0.187531	-0.140532	-0.237456
2	Amb	Grant	29	-0.191913	-0.14286	-0.242954
2	Amb	Grant	30	-0.197249	-0.147227	-0.246417
2	Amb	Grant	31	-0.201843	-0.15062	-0.248925
2	Amb	Grays Harbor	1	-0.254766	-0.217708	-0.293644
2	Amb	Grays Harbor	2	-0.307601	-0.261901	-0.350357
2	Amb	Grays Harbor	3	-0.363253	-0.307989	-0.421078
2	Amb	Grays Harbor	4	-0.428718	-0.360804	-0.495381
2	Amb	Grays Harbor	5	-0.478994	-0.403016	-0.556029
2	Amb	Grays Harbor	6	-0.492421	-0.421784	-0.56496
2	Amb	Grays Harbor	7	-0.503494	-0.424992	-0.584166
2	Amb	Grays Harbor	8	-0.520293	-0.440771	-0.595593
2	Amb	Grays Harbor	9	-0.535952	-0.457675	-0.607758
2	Amb	Grays Harbor	10	-0.534746	-0.45483	-0.613896
2	Amb	Grays Harbor	11	-0.536565	-0.457793	-0.614613
2	Amb	Grays Harbor	12	-0.537798	-0.460782	-0.616953
2	Amb	Grays Harbor	13	-0.536268	-0.457135	-0.6157
2	Amb	Grays Harbor	14	-0.537385	-0.461475	-0.616193
2	Amb	Grays Harbor	15	-0.540225	-0.462308	-0.617108
2	Amb	Grays Harbor	16	-0.541741	-0.464957	-0.618152
2	Amb	Grays Harbor	17	-0.538013	-0.459756	-0.616393
2	Amb	Grays Harbor	18	-0.542391	-0.462488	-0.616588
2	Amb	Grays Harbor	19	-0.539659	-0.461569	-0.617481
2	Amb	Grays Harbor	20	-0.542615	-0.4647	-0.620173
2	Amb	Grays Harbor	21	-0.539523	-0.463827	-0.614536
2	Amb	Grays Harbor	22	-0.543582	-0.463907	-0.616784
2	Amb	Grays Harbor	23	-0.543107	-0.460953	-0.617516
2	Amb	Grays Harbor	24	-0.543601	-0.46369	-0.627294
2	Amb	Grays Harbor	25	-0.541017	-0.466776	-0.619921
2	Amb	Grays Harbor	26	-0.543453	-0.469692	-0.625842
2	Amb	Grays Harbor	27	-0.546442	-0.466659	-0.626637
2	Amb	Grays Harbor	28	-0.548094	-0.469957	-0.62234
2	Amb	Grays Harbor	29	-0.548225	-0.470162	-0.620776
2	Amb	Grays Harbor	30	-0.546385	-0.474225	-0.626458
2	Amb	Grays Harbor	31	-0.549354	-0.473696	-0.624086
2	Amb	Island	1	-0.0080879	-0.0061918	-0.0100583
2	Amb	Island	2	-0.013037	-0.0094168	-0.016884
2	Amb	Island	3	-0.0179795	-0.012609	-0.0238542
2	Amb	Island	4	-0.0233204	-0.0162893	-0.0310345
2	Amb	Island	5	-0.0282323	-0.0192386	-0.0372934
2	Amb	Island	6	-0.0324873	-0.0218677	-0.0439255
2	Amb	Island	7	-0.0372733	-0.0240579	-0.0494335
2	Amb	Island	8	-0.0407111	-0.0256281	-0.0552205
2	Amb	Island	9	-0.0450792	-0.0284958	-0.0617435
2	Amb	Island	10	-0.0489795	-0.0293324	-0.0669647
2	Amb	Island	11	-0.0497028	-0.0311591	-0.0688687
2	Amb	Island	12	-0.0511707	-0.0325216	-0.069532
2	Amb	Island	13	-0.0506216	-0.0318746	-0.0688028
2	Amb	Island	14	-0.0514989	-0.0327341	-0.0700838
2	Amb	Island	15	-0.0519396	-0.0325098	-0.0698047
2	Amb	Island	16	-0.0524773	-0.0329114	-0.0696091
2	Amb	Island	17	-0.052429	-0.0343772	-0.0703992
2	Amb	Island	18	-0.0518918	-0.0345714	-0.0708776
2	Amb	Island	19	-0.0533766	-0.03464	-0.0702721
2	Amb	Island	20	-0.0526604	-0.0337338	-0.071115
2	Amb	Island	21	-0.0537489	-0.0360636	-0.0725999
2	Amb	Island	22	-0.0554578	-0.0352975	-0.0734232
2	Amb	Island	23	-0.054718	-0.0367192	-0.0722718
2	Amb	Island	24	-0.0547917	-0.0368291	-0.0737582
2	Amb	Island	25	-0.0554262	-0.0355663	-0.0751584
2	Amb	Island	26	-0.0555169	-0.0361115	-0.0747964
2	Amb	Island	27	-0.0557598	-0.0370014	-0.0751872
2	Amb	Island	28	-0.0556264	-0.0367486	-0.0748275
2	Amb	Island	29	-0.0560107	-0.0370634	-0.0748576
2	Amb	Island	30	-0.0565838	-0.0372383	-0.075739
2	Amb	Island	31	-0.0565375	-0.0382108	-0.0755029
2	Amb	Jefferson	1	-0.0735773	-0.0655671	-0.0822278
2	Amb	Jefferson	2	-0.091534	-0.0814774	-0.102167
2	Amb	Jefferson	3	-0.108631	-0.094792	-0.120482
2	Amb	Jefferson	4	-0.128231	-0.113888	-0.142243
2	Amb	Jefferson	5	-0.149071	-0.131304	-0.166571
2	Amb	Jefferson	6	-0.172921	-0.154476	-0.196162
2	Amb	Jefferson	7	-0.182326	-0.159248	-0.205765
2	Amb	Jefferson	8	-0.189174	-0.167006	-0.211286
2	Amb	Jefferson	9	-0.193339	-0.169368	-0.216054
2	Amb	Jefferson	10	-0.198832	-0.174538	-0.222817
2	Amb	Jefferson	11	-0.201336	-0.176876	-0.22577
2	Amb	Jefferson	12	-0.202416	-0.178416	-0.227117
2	Amb	Jefferson	13	-0.20423	-0.180182	-0.228821
2	Amb	Jefferson	14	-0.206194	-0.182261	-0.231191
2	Amb	Jefferson	15	-0.209627	-0.1832	-0.233611
2	Amb	Jefferson	16	-0.21047	-0.184287	-0.234809
2	Amb	Jefferson	17	-0.21165	-0.187647	-0.238277
2	Amb	Jefferson	18	-0.213668	-0.186319	-0.239825
2	Amb	Jefferson	19	-0.213818	-0.188028	-0.238843
2	Amb	Jefferson	20	-0.216681	-0.19039	-0.242379
2	Amb	Jefferson	21	-0.217728	-0.193358	-0.243728
2	Amb	Jefferson	22	-0.217866	-0.191819	-0.242431
2	Amb	Jefferson	23	-0.22043	-0.193805	-0.245941
2	Amb	Jefferson	24	-0.22059	-0.197047	-0.246615
2	Amb	Jefferson	25	-0.222876	-0.19717	-0.248394
2	Amb	Jefferson	26	-0.225712	-0.196717	-0.25176
2	Amb	Jefferson	27	-0.226678	-0.201191	-0.254452
2	Amb	Jefferson	28	-0.228152	-0.202197	-0.255555
2	Amb	Jefferson	29	-0.229324	-0.202971	-0.254387
2	Amb	Jefferson	30	-0.230522	-0.205369	-0.256851
2	Amb	Jefferson	31	-0.232052	-0.204995	-0.258775
2	Amb	King	1	-0.0116143	-0.0076977	-0.0152016
2	Amb	King	2	-0.0231374	-0.0160137	-0.0301398
2	Amb	King	3	-0.0342588	-0.0236873	-0.0451533
2	Amb	King	4	-0.0468948	-0.0318588	-0.0612321
2	Amb	King	5	-0.0585413	-0.039678	-0.0757706
2	Amb	King	6	-0.068937	-0.0464489	-0.0910707
2	Amb	King	7	-0.0821511	-0.0558284	-0.106274
2	Amb	King	8	-0.0945189	-0.0614997	-0.121917
2	Amb	King	9	-0.103622	-0.0711989	-0.138977
2	Amb	King	10	-0.116073	-0.0831856	-0.154549
2	Amb	King	11	-0.258077	-0.210408	-0.302318
2	Amb	King	12	-0.260557	-0.210802	-0.310286
2	Amb	King	13	-0.26506	-0.21291	-0.312486
2	Amb	King	14	-0.265633	-0.22044	-0.314005
2	Amb	King	15	-0.26947	-0.220373	-0.314853
2	Amb	King	16	-0.270958	-0.216046	-0.31718
2	Amb	King	17	-0.273294	-0.222502	-0.318696
2	Amb	King	18	-0.275029	-0.226112	-0.322785
2	Amb	King	19	-0.278064	-0.230233	-0.328242
2	Amb	King	20	-0.27849	-0.230062	-0.330674
2	Amb	King	21	-0.280343	-0.231021	-0.328056
2	Amb	King	22	-0.282695	-0.237219	-0.328604
2	Amb	King	23	-0.283946	-0.237653	-0.334068
2	Amb	King	24	-0.287699	-0.239084	-0.336016
2	Amb	King	25	-0.288919	-0.239571	-0.338808
2	Amb	King	26	-0.289706	-0.247481	-0.337724
2	Amb	King	27	-0.290964	-0.244899	-0.33966
2	Amb	King	28	-0.294102	-0.24445	-0.34144
2	Amb	King	29	-0.294134	-0.245433	-0.347413
2	Amb	King	30	-0.295855	-0.249764	-0.346229
2	Amb	King	31	-0.298071	-0.252053	-0.344401
2	Amb	Kitsap	1	-0.0263624	-0.0225192	-0.0299943
2	Amb	Kitsap	2	-0.0385033	-0.0321583	-0.0443309
2	Amb	Kitsap	3	-0.0503723	-0.0416857	-0.0593144
2	Amb	Kitsap	4	-0.0632871	-0.0525095	-0.074595
2	Amb	Kitsap	5	-0.0771314	-0.0634011	-0.0914658
2	Amb	Kitsap	6	-0.0911716	-0.0748592	-0.109548
2	Amb	Kitsap	7	-0.103438	-0.0838209	-0.124785
2	Amb	Kitsap	8	-0.114274	-0.0912946	-0.138733
2	Amb	Kitsap	9	-0.124489	-0.100068	-0.147613
2	Amb	Kitsap	10	-0.133931	-0.10613	-0.162786
2	Amb	Kitsap	11	-0.134477	-0.107235	-0.162785
2	Amb	Kitsap	12	-0.135736	-0.108191	-0.162764
2	Amb	Kitsap	13	-0.136352	-0.107914	-0.164287
2	Amb	Kitsap	14	-0.137112	-0.107731	-0.164859
2	Amb	Kitsap	15	-0.136069	-0.109226	-0.162626
2	Amb	Kitsap	16	-0.136501	-0.10833	-0.163552
2	Amb	Kitsap	17	-0.137818	-0.109217	-0.164802
2	Amb	Kitsap	18	-0.138555	-0.110193	-0.166779
2	Amb	Kitsap	19	-0.139716	-0.110768	-0.166189
2	Amb	Kitsap	20	-0.139443	-0.112662	-0.165312
2	Amb	Kitsap	21	-0.139176	-0.111866	-0.167135
2	Amb	Kitsap	22	-0.140036	-0.11156	-0.166696
2	Amb	Kitsap	23	-0.140975	-0.112615	-0.165325
2	Amb	Kitsap	24	-0.141183	-0.11292	-0.167578
2	Amb	Kitsap	25	-0.140702	-0.113584	-0.16725
2	Amb	Kitsap	26	-0.141933	-0.112487	-0.169607
2	Amb	Kitsap	27	-0.142019	-0.112579	-0.172082
2	Amb	Kitsap	28	-0.14216	-0.113999	-0.169047
2	Amb	Kitsap	29	-0.141084	-0.114921	-0.168771
2	Amb	Kitsap	30	-0.142543	-0.114587	-0.169106
2	Amb	Kitsap	31	-0.142129	-0.114693	-0.169499
2	Amb	Kittitas	1	-0.0437644	-0.0378183	-0.0496162
2	Amb	Kittitas	2	-0.0553116	-0.0478193	-0.0625481
2	Amb	Kittitas	3	-0.0688949	-0.0596584	-0.0780425
2	Amb	Kittitas	4	-0.0841932	-0.0725068	-0.0958013
2	Amb	Kittitas	5	-0.0993484	-0.0862562	-0.112258
2	Amb	Kittitas	6	-0.106476	-0.0919389	-0.119749
2	Amb	Kittitas	7	-0.110667	-0.0969495	-0.125581
2	Amb	Kittitas	8	-0.113695	-0.0986514	-0.130931
2	Amb	Kittitas	9	-0.118531	-0.102391	-0.134823
2	Amb	Kittitas	10	-0.123263	-0.105159	-0.141915
2	Amb	Kittitas	11	-0.124644	-0.106788	-0.141943
2	Amb	Kittitas	12	-0.125177	-0.108503	-0.142874
2	Amb	Kittitas	13	-0.126187	-0.109248	-0.145058
2	Amb	Kittitas	14	-0.127244	-0.10923	-0.145815
2	Amb	Kittitas	15	-0.128332	-0.109465	-0.14584
2	Amb	Kittitas	16	-0.130414	-0.112493	-0.149061
2	Amb	Kittitas	17	-0.131216	-0.112067	-0.149019
2	Amb	Kittitas	18	-0.131658	-0.112763	-0.150066
2	Amb	Kittitas	19	-0.132881	-0.11383	-0.153171
2	Amb	Kittitas	20	-0.134645	-0.115896	-0.154096
2	Amb	Kittitas	21	-0.135733	-0.115609	-0.15556
2	Amb	Kittitas	22	-0.136739	-0.116513	-0.156113
2	Amb	Kittitas	23	-0.13878	-0.118963	-0.157781
2	Amb	Kittitas	24	-0.140058	-0.120111	-0.159658
2	Amb	Kittitas	25	-0.14049	-0.121608	-0.160068
2	Amb	Kittitas	26	-0.142484	-0.122188	-0.162585
2	Amb	Kittitas	27	-0.142896	-0.123676	-0.162381
2	Amb	Kittitas	28	-0.144646	-0.123185	-0.165761
2	Amb	Kittitas	29	-0.146379	-0.125037	-0.167384
2	Amb	Kittitas	30	-0.147233	-0.126323	-0.167726
2	Amb	Kittitas	31	-0.148786	-0.125969	-0.168721
2	Amb	Klickitat	1	-0.135535	-0.114264	-0.15702
2	Amb	Klickitat	2	-0.167308	-0.139739	-0.19228
2	Amb	Klickitat	3	-0.203427	-0.170389	-0.235746
2	Amb	Klickitat	4	-0.246126	-0.208291	-0.284403
2	Amb	Klickitat	5	-0.295888	-0.249548	-0.343051
2	Amb	Klickitat	6	-0.352415	-0.300125	-0.406706
2	Amb	Klickitat	7	-0.356296	-0.29988	-0.413741
2	Amb	Klickitat	8	-0.360094	-0.30706	-0.419939
2	Amb	Klickitat	9	-0.368541	-0.312259	-0.424265
2	Amb	Klickitat	10	-0.372435	-0.317003	-0.42722
2	Amb	Klickitat	11	-0.372346	-0.311416	-0.431041
2	Amb	Klickitat	12	-0.377212	-0.320936	-0.433474
2	Amb	Klickitat	13	-0.376086	-0.319585	-0.438441
2	Amb	Klickitat	14	-0.380734	-0.319145	-0.439644
2	Amb	Klickitat	15	-0.382497	-0.325311	-0.444224
2	Amb	Klickitat	16	-0.387088	-0.330457	-0.442838
2	Amb	Klickitat	17	-0.385523	-0.329083	-0.446784
2	Amb	Klickitat	18	-0.390738	-0.334144	-0.450111
2	Amb	Klickitat	19	-0.389332	-0.328166	-0.449733
2	Amb	Klickitat	20	-0.391287	-0.331176	-0.451983
2	Amb	Klickitat	21	-0.393826	-0.333272	-0.45382
2	Amb	Klickitat	22	-0.397189	-0.333481	-0.462014
2	Amb	Klickitat	23	-0.396659	-0.339409	-0.458262
2	Amb	Klickitat	24	-0.399413	-0.337798	-0.458117
2	Amb	Klickitat	25	-0.400568	-0.338755	-0.464602
2	Amb	Klickitat	26	-0.402151	-0.342826	-0.46366
2	Amb	Klickitat	27	-0.404662	-0.343167	-0.469087
2	Amb	Klickitat	28	-0.404193	-0.338066	-0.470251
2	Amb	Klickitat	29	-0.407664	-0.345697	-0.469821
2	Amb	Klickitat	30	-0.409481	-0.346401	-0.475176
2	Amb	Klickitat	31	-0.410691	-0.346634	-0.475371
2	Amb	Lewis	1	-0.143072	-0.12592	-0.159658
2	Amb	Lewis	2	-0.17802	-0.156501	-0.201171
2	Amb	Lewis	3	-0.220619	-0.195119	-0.246365
2	Amb	Lewis	4	-0.269973	-0.237718	-0.302756
2	Amb	Lewis	5	-0.318449	-0.278325	-0.355358
2	Amb	Lewis	6	-0.374904	-0.329307	-0.418138
2	Amb	Lewis	7	-0.433855	-0.375673	-0.489909
2	Amb	Lewis	8	-0.50806	-0.447747	-0.574063
2	Amb	Lewis	9	-0.592988	-0.515294	-0.672783
2	Amb	Lewis	10	-0.651642	-0.566838	-0.735779
2	Amb	Lewis	11	-0.66	-0.572361	-0.742954
2	Amb	Lewis	12	-0.665772	-0.576698	-0.75017
2	Amb	Lewis	13	-0.675063	-0.587872	-0.760201
2	Amb	Lewis	14	-0.677254	-0.592835	-0.767496
2	Amb	Lewis	15	-0.682338	-0.594937	-0.774272
2	Amb	Lewis	16	-0.686134	-0.597546	-0.774207
2	Amb	Lewis	17	-0.691862	-0.600568	-0.778301
2	Amb	Lewis	18	-0.693724	-0.606417	-0.776184
2	Amb	Lewis	19	-0.702984	-0.618778	-0.787575
2	Amb	Lewis	20	-0.703267	-0.61405	-0.791945
2	Amb	Lewis	21	-0.710783	-0.62197	-0.799167
2	Amb	Lewis	22	-0.714921	-0.620044	-0.802765
2	Amb	Lewis	23	-0.716793	-0.625725	-0.809106
2	Amb	Lewis	24	-0.719825	-0.627575	-0.805062
2	Amb	Lewis	25	-0.723294	-0.629972	-0.813503
2	Amb	Lewis	26	-0.727675	-0.638227	-0.816938
2	Amb	Lewis	27	-0.73118	-0.636495	-0.81511
2	Amb	Lewis	28	-0.732841	-0.64394	-0.826288
2	Amb	Lewis	29	-0.737827	-0.650988	-0.828791
2	Amb	Lewis	30	-0.744293	-0.64798	-0.832585
2	Amb	Lewis	31	-0.742737	-0.652988	-0.831688
2	Amb	Lincoln	1	-0.0095689	-0.0080045	-0.0113012
2	Amb	Lincoln	2	-0.0172228	-0.0139302	-0.0204055
2	Amb	Lincoln	3	-0.0246124	-0.0197895	-0.0297192
2	Amb	Lincoln	4	-0.0324435	-0.0262096	-0.0395886
2	Amb	Lincoln	5	-0.0403419	-0.0321743	-0.0494092
2	Amb	Lincoln	6	-0.0486313	-0.0389487	-0.0587351
2	Amb	Lincoln	7	-0.0560734	-0.0438057	-0.0677724
2	Amb	Lincoln	8	-0.0631511	-0.0506606	-0.0768644
2	Amb	Lincoln	9	-0.0706136	-0.055362	-0.0864037
2	Amb	Lincoln	10	-0.0771411	-0.0598932	-0.0934879
2	Amb	Lincoln	11	-0.0826483	-0.0637145	-0.100141
2	Amb	Lincoln	12	-0.0872065	-0.0684037	-0.105394
2	Amb	Lincoln	13	-0.0914221	-0.0708769	-0.111562
2	Amb	Lincoln	14	-0.0949205	-0.0732148	-0.117782
2	Amb	Lincoln	15	-0.0999823	-0.0770869	-0.12263
2	Amb	Lincoln	16	-0.103483	-0.0794761	-0.126972
2	Amb	Lincoln	17	-0.107766	-0.083412	-0.134242
2	Amb	Lincoln	18	-0.112255	-0.0864733	-0.138931
2	Amb	Lincoln	19	-0.117345	-0.090691	-0.144526
2	Amb	Lincoln	20	-0.121269	-0.0926921	-0.148537
2	Amb	Lincoln	21	-0.124455	-0.0943454	-0.155254
2	Amb	Lincoln	22	-0.130227	-0.0985026	-0.1611
2	Amb	Lincoln	23	-0.133689	-0.0987294	-0.166948
2	Amb	Lincoln	24	-0.137286	-0.104177	-0.17253
2	Amb	Lincoln	25	-0.141486	-0.107684	-0.177615
2	Amb	Lincoln	26	-0.145189	-0.108982	-0.18266
2	Amb	Lincoln	27	-0.150098	-0.111381	-0.186747
2	Amb	Lincoln	28	-0.1542	-0.115229	-0.192951
2	Amb	Lincoln	29	-0.158531	-0.118664	-0.199275
2	Amb	Lincoln	30	-0.163421	-0.124757	-0.208576
2	Amb	Lincoln	31	-0.167334	-0.122023	-0.209443
2	Amb	Mason	1	-0.0653906	-0.0588354	-0.0719561
2	Amb	Mason	2	-0.0829312	-0.073736	-0.0909375
2	Amb	Mason	3	-0.103702	-0.091118	-0.113987
2	Amb	Mason	4	-0.125839	-0.111985	-0.139503
2	Amb	Mason	5	-0.150546	-0.132676	-0.167447
2	Amb	Mason	6	-0.176714	-0.155649	-0.19681
2	Amb	Mason	7	-0.206164	-0.18028	-0.229735
2	Amb	Mason	8	-0.217135	-0.190328	-0.24372
2	Amb	Mason	9	-0.223638	-0.194845	-0.252626
2	Amb	Mason	10	-0.231327	-0.199872	-0.260366
2	Amb	Mason	11	-0.233266	-0.203407	-0.264435
2	Amb	Mason	12	-0.235519	-0.206904	-0.263738
2	Amb	Mason	13	-0.239319	-0.208619	-0.269068
2	Amb	Mason	14	-0.241842	-0.209409	-0.273101
2	Amb	Mason	15	-0.243119	-0.21591	-0.272512
2	Amb	Mason	16	-0.249049	-0.216479	-0.278759
2	Amb	Mason	17	-0.250216	-0.219022	-0.280648
2	Amb	Mason	18	-0.25199	-0.220739	-0.283072
2	Amb	Mason	19	-0.255625	-0.225066	-0.288439
2	Amb	Mason	20	-0.258129	-0.227887	-0.290293
2	Amb	Mason	21	-0.260244	-0.226498	-0.292073
2	Amb	Mason	22	-0.263824	-0.23358	-0.295667
2	Amb	Mason	23	-0.267388	-0.235817	-0.298685
2	Amb	Mason	24	-0.271002	-0.23835	-0.304301
2	Amb	Mason	25	-0.272597	-0.240247	-0.3043
2	Amb	Mason	26	-0.276407	-0.245334	-0.309489
2	Amb	Mason	27	-0.279236	-0.247147	-0.312949
2	Amb	Mason	28	-0.283866	-0.25013	-0.317666
2	Amb	Mason	29	-0.286249	-0.253914	-0.317558
2	Amb	Mason	30	-0.287704	-0.256609	-0.321887
2	Amb	Mason	31	-0.292202	-0.260764	-0.324261
2	Amb	Okanogan	1	-0.0038823	-0.0027026	-0.0056636
2	Amb	Okanogan	2	-0.0081411	-0.0058665	-0.010737
2	Amb	Okanogan	3	-0.0122634	-0.0091244	-0.0157158
2	Amb	Okanogan	4	-0.0163565	-0.0122002	-0.0208208
2	Amb	Okanogan	5	-0.0209901	-0.0158815	-0.026389
2	Amb	Okanogan	6	-0.0250367	-0.0189964	-0.0312869
2	Amb	Okanogan	7	-0.029316	-0.0221774	-0.0370982
2	Amb	Okanogan	8	-0.0334318	-0.0258107	-0.0420032
2	Amb	Okanogan	9	-0.0381921	-0.0287628	-0.0479781
2	Amb	Okanogan	10	-0.0424579	-0.032581	-0.0525439
2	Amb	Okanogan	11	-0.0433701	-0.0334552	-0.0543262
2	Amb	Okanogan	12	-0.0441593	-0.0345881	-0.055875
2	Amb	Okanogan	13	-0.0455829	-0.0351008	-0.0565997
2	Amb	Okanogan	14	-0.0470672	-0.0370348	-0.0576164
2	Amb	Okanogan	15	-0.0475734	-0.0380926	-0.0593921
2	Amb	Okanogan	16	-0.0499315	-0.0387499	-0.0615283
2	Amb	Okanogan	17	-0.0515198	-0.040794	-0.0640345
2	Amb	Okanogan	18	-0.0534383	-0.0414274	-0.063852
2	Amb	Okanogan	19	-0.0549919	-0.0437381	-0.0666929
2	Amb	Okanogan	20	-0.0565055	-0.0451301	-0.0681208
2	Amb	Okanogan	21	-0.0578891	-0.045747	-0.0701079
2	Amb	Okanogan	22	-0.0590336	-0.0468032	-0.0727169
2	Amb	Okanogan	23	-0.0607091	-0.0485795	-0.073515
2	Amb	Okanogan	24	-0.0626863	-0.0498455	-0.0758084
2	Amb	Okanogan	25	-0.0636829	-0.0492804	-0.0766395
2	Amb	Okanogan	26	-0.0645936	-0.0507096	-0.0786179
2	Amb	Okanogan	27	-0.0657401	-0.0530826	-0.0796397
2	Amb	Okanogan	28	-0.0671342	-0.0535477	-0.0813362
2	Amb	Okanogan	29	-0.0685219	-0.0539201	-0.0832712
2	Amb	Okanogan	30	-0.0700642	-0.0557756	-0.0843433
2	Amb	Okanogan	31	-0.0718365	-0.0570976	-0.085877
2	Amb	Pacific	1	-0.165969	-0.137523	-0.195448
2	Amb	Pacific	2	-0.18452	-0.152689	-0.215421
2	Amb	Pacific	3	-0.216414	-0.177391	-0.254573
2	Amb	Pacific	4	-0.252369	-0.204405	-0.30013
2	Amb	Pacific	5	-0.294999	-0.240046	-0.348888
2	Amb	Pacific	6	-0.347421	-0.281289	-0.417292
2	Amb	Pacific	7	-0.411215	-0.328625	-0.491587
2	Amb	Pacific	8	-0.437091	-0.358524	-0.515779
2	Amb	Pacific	9	-0.441388	-0.351365	-0.52483
2	Amb	Pacific	10	-0.445932	-0.363152	-0.528627
2	Amb	Pacific	11	-0.451545	-0.367141	-0.530864
2	Amb	Pacific	12	-0.452385	-0.372658	-0.539743
2	Amb	Pacific	13	-0.460113	-0.370517	-0.542516
2	Amb	Pacific	14	-0.459589	-0.369988	-0.544756
2	Amb	Pacific	15	-0.464734	-0.385168	-0.549124
2	Amb	Pacific	16	-0.46792	-0.385754	-0.546159
2	Amb	Pacific	17	-0.472336	-0.391471	-0.55507
2	Amb	Pacific	18	-0.476074	-0.386106	-0.56139
2	Amb	Pacific	19	-0.478498	-0.395201	-0.559818
2	Amb	Pacific	20	-0.478545	-0.393034	-0.566002
2	Amb	Pacific	21	-0.482547	-0.400147	-0.5664
2	Amb	Pacific	22	-0.487275	-0.399444	-0.5679
2	Amb	Pacific	23	-0.489853	-0.407108	-0.574516
2	Amb	Pacific	24	-0.492228	-0.405577	-0.580997
2	Amb	Pacific	25	-0.496267	-0.407143	-0.581028
2	Amb	Pacific	26	-0.495838	-0.41113	-0.581114
2	Amb	Pacific	27	-0.499255	-0.416346	-0.5897
2	Amb	Pacific	28	-0.502216	-0.416646	-0.586138
2	Amb	Pacific	29	-0.502624	-0.417051	-0.591582
2	Amb	Pacific	30	-0.504082	-0.419095	-0.591209
2	Amb	Pacific	31	-0.506059	-0.422114	-0.595492
2	Amb	Pend Oreille	1	-0.0452313	-0.0392912	-0.0512245
2	Amb	Pend Oreille	2	-0.0554099	-0.0477879	-0.0626169
2	Amb	Pend Oreille	3	-0.0674513	-0.058764	-0.0762255
2	Amb	Pend Oreille	4	-0.0816659	-0.0712124	-0.0917982
2	Amb	Pend Oreille	5	-0.0981754	-0.0849017	-0.111825
2	Amb	Pend Oreille	6	-0.118224	-0.102678	-0.132835
2	Amb	Pend Oreille	7	-0.14108	-0.123388	-0.159047
2	Amb	Pend Oreille	8	-0.164068	-0.142354	-0.185301
2	Amb	Pend Oreille	9	-0.190624	-0.165532	-0.217082
2	Amb	Pend Oreille	10	-0.208457	-0.177859	-0.237134
2	Amb	Pend Oreille	11	-0.208804	-0.178589	-0.23959
2	Amb	Pend Oreille	12	-0.209067	-0.181145	-0.240982
2	Amb	Pend Oreille	13	-0.210829	-0.180033	-0.238707
2	Amb	Pend Oreille	14	-0.212967	-0.180749	-0.242977
2	Amb	Pend Oreille	15	-0.212569	-0.184568	-0.24538
[truncated: 1,628 more rows]

## Sheet: S4-S8_dictionary
FileName	Description
Supplemental Table S4.csv	Evaluated results of Monte Carlo runs on each scenario in each year, statewide.
Supplemental Table S5.csv	Evaluated results of Monte Carlo runs on each pathway activity per scenario in each year, statewide.
Supplemental Table S6.csv	Evaluated results of Monte Carlo runs on each scenario in each year, per county.
Supplemental Table S7.csv	Evaluated results of Monte Carlo runs on each pathway subactivity per scenario in each year, per county.
Supplemental Table S8.csv	Evaluated results of Monte Carlo runs on each pathway activity per scenario in each year, per county.
Columns	Description	Values or Units
Scenario	Numeric identifier for each scenario.	2=Ambitious, 3=Moderate, 1=Limited
ScenName	Name of each scenario	Amb=Ambitious, Mod=Moderate, Lim=Limited
County	Name of each county (39 counties total)	Adams, Asotin, Benton, Chelan, Clallam, Clark, Columbia, Cowlitz, Douglas, Ferry, Franklin, Garfield, Grant, Grays Harbor, Island, Jefferson, King, Kitsap, Kittitas, Klickitat, Lewis, Lincoln, Mason, Okanogan, Pacific, Pend Oreille, Pierce, San Juan, Skagit, Skamania, Snohomish, Spokane, Stevens, Thurston, Wahkiakum, Walla Walla, Whatcom, Whitman, Yakima
Activity	NCS pathway, where some are a combination of subactivities (defined below)	ACF=avoided conversion of forest, ag=agricultural activities, grass=restoration and avoided conversion of grasslands, ifm=improved forest management (aka extended timber harvest rotations), reforest=replanting after wildfires, rref=riparian reforestation, sage=restoration and avoided conversion of sagebrush-steppe, tide=tidal wetland restoration
Subactivity	Specific NCS activity that is equivalent to or combines with other subactivities to be a NCS pathway	(see Lines 19-37 below)
Year	Consecutive years that the pathway is implemented per each scenario	Range: 1-31 (e.g. representing hypothetical years 2020-2050)
Median	Median of Monte Carlo results in MMT CO2e per year.	Units: MMT CO2e yr-1
CI_High	Confidence Interval at 95th percentile value of Monte Carlo results.	Units: MMT CO2e yr-1
CI_Low	Confidence Interval at 5th percentile value of Monte Carlo results.	Units: MMT CO2e yr-1
Subactivity (Line 13 above)	Activity (Line 12 above)	Description
1f2rur	ACF	avoided conversion of forests to rural development
2f2urb	ACF	avoided conversion of forests to urban development
1cc	ag	cover crop
2nt	ag	no-till
3nm	ag	nutrient management
1grass	grass	restoration and avoided conversion of grassland
1feder	ifm	extended timber harvest on federal lands
2other	ifm	extended timber harvest on other (e.g. nature preserves, local government) lands
3priva	ifm	extended timber harvest on private lands (industrial and non-industrial)
4state	ifm	extended timber harvest on state lands
5prseq	ifm	extended timber harvest on private lands, with additional sequestration by avoiding clearcutting
1intensL	reforest	replanting forest after low intensity wildfire
2intensM	reforest	replanting forest after medium intensity wildfire
3intensH	reforest	replanting forest after high intensity wildfire
1rref	rref	riparian reforestation
1s2ag	sage	restoration of sagebrush-steppe from agricultural uses
2ag2s	sage	avoided conversation of sagebrush-steppe to agricultural uses
1tide	tide	tidal wetland restoration
