# Supplementary material for: Leveraging the potential of nature to meet net zero greenhouse gas emissions in Washington State
Source: PeerJ. 2021 Jul 21;9:e11802. doi: 10.7717/peerj.11802 (PMC8308619; doi:10.7717/peerj.11802)
Supplement: Supplemental Information 8 — A data dictionary is included as a tab in this file. [file peerj-09-11802-s008.xlsx]

## Sheet: Supplemental Table S8
Scenario	ScenName	County	Activity	Subactivity	Year	Median	CI_High	CI_Low
1	Lim	Adams	ACF	1f2rur	1	0	0	0
1	Lim	Adams	ACF	1f2rur	2	0	0	0
1	Lim	Adams	ACF	1f2rur	3	0	0	0
1	Lim	Adams	ACF	1f2rur	4	0	0	0
1	Lim	Adams	ACF	1f2rur	5	0	0	0
1	Lim	Adams	ACF	1f2rur	6	0	0	0
1	Lim	Adams	ACF	1f2rur	7	0	0	0
1	Lim	Adams	ACF	1f2rur	8	0	0	0
1	Lim	Adams	ACF	1f2rur	9	0	0	0
1	Lim	Adams	ACF	1f2rur	10	0	0	0
1	Lim	Adams	ACF	1f2rur	11	0	0	0
1	Lim	Adams	ACF	1f2rur	12	0	0	0
1	Lim	Adams	ACF	1f2rur	13	0	0	0
1	Lim	Adams	ACF	1f2rur	14	0	0	0
1	Lim	Adams	ACF	1f2rur	15	0	0	0
1	Lim	Adams	ACF	1f2rur	16	0	0	0
1	Lim	Adams	ACF	1f2rur	17	0	0	0
1	Lim	Adams	ACF	1f2rur	18	0	0	0
1	Lim	Adams	ACF	1f2rur	19	0	0	0
1	Lim	Adams	ACF	1f2rur	20	0	0	0
1	Lim	Adams	ACF	1f2rur	21	0	0	0
1	Lim	Adams	ACF	1f2rur	22	0	0	0
1	Lim	Adams	ACF	1f2rur	23	0	0	0
1	Lim	Adams	ACF	1f2rur	24	0	0	0
1	Lim	Adams	ACF	1f2rur	25	0	0	0
1	Lim	Adams	ACF	1f2rur	26	0	0	0
1	Lim	Adams	ACF	1f2rur	27	0	0	0
1	Lim	Adams	ACF	1f2rur	28	0	0	0
1	Lim	Adams	ACF	1f2rur	29	0	0	0
1	Lim	Adams	ACF	1f2rur	30	0	0	0
1	Lim	Adams	ACF	1f2rur	31	0	0	0
1	Lim	Adams	ACF	2f2urb	1	0	0	0
1	Lim	Adams	ACF	2f2urb	2	0	0	0
1	Lim	Adams	ACF	2f2urb	3	0	0	0
1	Lim	Adams	ACF	2f2urb	4	0	0	0
1	Lim	Adams	ACF	2f2urb	5	0	0	0
1	Lim	Adams	ACF	2f2urb	6	0	0	0
1	Lim	Adams	ACF	2f2urb	7	0	0	0
1	Lim	Adams	ACF	2f2urb	8	0	0	0
1	Lim	Adams	ACF	2f2urb	9	0	0	0
1	Lim	Adams	ACF	2f2urb	10	0	0	0
1	Lim	Adams	ACF	2f2urb	11	0	0	0
1	Lim	Adams	ACF	2f2urb	12	0	0	0
1	Lim	Adams	ACF	2f2urb	13	0	0	0
1	Lim	Adams	ACF	2f2urb	14	0	0	0
1	Lim	Adams	ACF	2f2urb	15	0	0	0
1	Lim	Adams	ACF	2f2urb	16	0	0	0
1	Lim	Adams	ACF	2f2urb	17	0	0	0
1	Lim	Adams	ACF	2f2urb	18	0	0	0
1	Lim	Adams	ACF	2f2urb	19	0	0	0
1	Lim	Adams	ACF	2f2urb	20	0	0	0
1	Lim	Adams	ACF	2f2urb	21	0	0	0
1	Lim	Adams	ACF	2f2urb	22	0	0	0
1	Lim	Adams	ACF	2f2urb	23	0	0	0
1	Lim	Adams	ACF	2f2urb	24	0	0	0
1	Lim	Adams	ACF	2f2urb	25	0	0	0
1	Lim	Adams	ACF	2f2urb	26	0	0	0
1	Lim	Adams	ACF	2f2urb	27	0	0	0
1	Lim	Adams	ACF	2f2urb	28	0	0	0
1	Lim	Adams	ACF	2f2urb	29	0	0	0
1	Lim	Adams	ACF	2f2urb	30	0	0	0
1	Lim	Adams	ACF	2f2urb	31	0	0	0
2	Amb	Adams	ACF	1f2rur	1	0	0	0
2	Amb	Adams	ACF	1f2rur	2	0	0	0
2	Amb	Adams	ACF	1f2rur	3	0	0	0
2	Amb	Adams	ACF	1f2rur	4	0	0	0
2	Amb	Adams	ACF	1f2rur	5	0	0	0
2	Amb	Adams	ACF	1f2rur	6	0	0	0
2	Amb	Adams	ACF	1f2rur	7	0	0	0
2	Amb	Adams	ACF	1f2rur	8	0	0	0
2	Amb	Adams	ACF	1f2rur	9	0	0	0
2	Amb	Adams	ACF	1f2rur	10	0	0	0
2	Amb	Adams	ACF	1f2rur	11	0	0	0
2	Amb	Adams	ACF	1f2rur	12	0	0	0
2	Amb	Adams	ACF	1f2rur	13	0	0	0
2	Amb	Adams	ACF	1f2rur	14	0	0	0
2	Amb	Adams	ACF	1f2rur	15	0	0	0
2	Amb	Adams	ACF	1f2rur	16	0	0	0
2	Amb	Adams	ACF	1f2rur	17	0	0	0
2	Amb	Adams	ACF	1f2rur	18	0	0	0
2	Amb	Adams	ACF	1f2rur	19	0	0	0
2	Amb	Adams	ACF	1f2rur	20	0	0	0
2	Amb	Adams	ACF	1f2rur	21	0	0	0
2	Amb	Adams	ACF	1f2rur	22	0	0	0
2	Amb	Adams	ACF	1f2rur	23	0	0	0
2	Amb	Adams	ACF	1f2rur	24	0	0	0
2	Amb	Adams	ACF	1f2rur	25	0	0	0
2	Amb	Adams	ACF	1f2rur	26	0	0	0
2	Amb	Adams	ACF	1f2rur	27	0	0	0
2	Amb	Adams	ACF	1f2rur	28	0	0	0
2	Amb	Adams	ACF	1f2rur	29	0	0	0
2	Amb	Adams	ACF	1f2rur	30	0	0	0
2	Amb	Adams	ACF	1f2rur	31	0	0	0
2	Amb	Adams	ACF	2f2urb	1	0	0	0
2	Amb	Adams	ACF	2f2urb	2	0	0	0
2	Amb	Adams	ACF	2f2urb	3	0	0	0
2	Amb	Adams	ACF	2f2urb	4	0	0	0
2	Amb	Adams	ACF	2f2urb	5	0	0	0
2	Amb	Adams	ACF	2f2urb	6	0	0	0
2	Amb	Adams	ACF	2f2urb	7	0	0	0
2	Amb	Adams	ACF	2f2urb	8	0	0	0
2	Amb	Adams	ACF	2f2urb	9	0	0	0
2	Amb	Adams	ACF	2f2urb	10	0	0	0
2	Amb	Adams	ACF	2f2urb	11	0	0	0
2	Amb	Adams	ACF	2f2urb	12	0	0	0
2	Amb	Adams	ACF	2f2urb	13	0	0	0
2	Amb	Adams	ACF	2f2urb	14	0	0	0
2	Amb	Adams	ACF	2f2urb	15	0	0	0
2	Amb	Adams	ACF	2f2urb	16	0	0	0
2	Amb	Adams	ACF	2f2urb	17	0	0	0
2	Amb	Adams	ACF	2f2urb	18	0	0	0
2	Amb	Adams	ACF	2f2urb	19	0	0	0
2	Amb	Adams	ACF	2f2urb	20	0	0	0
2	Amb	Adams	ACF	2f2urb	21	0	0	0
2	Amb	Adams	ACF	2f2urb	22	0	0	0
2	Amb	Adams	ACF	2f2urb	23	0	0	0
2	Amb	Adams	ACF	2f2urb	24	0	0	0
2	Amb	Adams	ACF	2f2urb	25	0	0	0
2	Amb	Adams	ACF	2f2urb	26	0	0	0
2	Amb	Adams	ACF	2f2urb	27	0	0	0
2	Amb	Adams	ACF	2f2urb	28	0	0	0
2	Amb	Adams	ACF	2f2urb	29	0	0	0
2	Amb	Adams	ACF	2f2urb	30	0	0	0
2	Amb	Adams	ACF	2f2urb	31	0	0	0
3	Mod	Adams	ACF	1f2rur	1	0	0	0
3	Mod	Adams	ACF	1f2rur	2	0	0	0
3	Mod	Adams	ACF	1f2rur	3	0	0	0
3	Mod	Adams	ACF	1f2rur	4	0	0	0
3	Mod	Adams	ACF	1f2rur	5	0	0	0
3	Mod	Adams	ACF	1f2rur	6	0	0	0
3	Mod	Adams	ACF	1f2rur	7	0	0	0
3	Mod	Adams	ACF	1f2rur	8	0	0	0
3	Mod	Adams	ACF	1f2rur	9	0	0	0
3	Mod	Adams	ACF	1f2rur	10	0	0	0
3	Mod	Adams	ACF	1f2rur	11	0	0	0
3	Mod	Adams	ACF	1f2rur	12	0	0	0
3	Mod	Adams	ACF	1f2rur	13	0	0	0
3	Mod	Adams	ACF	1f2rur	14	0	0	0
3	Mod	Adams	ACF	1f2rur	15	0	0	0
3	Mod	Adams	ACF	1f2rur	16	0	0	0
3	Mod	Adams	ACF	1f2rur	17	0	0	0
3	Mod	Adams	ACF	1f2rur	18	0	0	0
3	Mod	Adams	ACF	1f2rur	19	0	0	0
3	Mod	Adams	ACF	1f2rur	20	0	0	0
3	Mod	Adams	ACF	1f2rur	21	0	0	0
3	Mod	Adams	ACF	1f2rur	22	0	0	0
3	Mod	Adams	ACF	1f2rur	23	0	0	0
3	Mod	Adams	ACF	1f2rur	24	0	0	0
3	Mod	Adams	ACF	1f2rur	25	0	0	0
3	Mod	Adams	ACF	1f2rur	26	0	0	0
3	Mod	Adams	ACF	1f2rur	27	0	0	0
3	Mod	Adams	ACF	1f2rur	28	0	0	0
3	Mod	Adams	ACF	1f2rur	29	0	0	0
3	Mod	Adams	ACF	1f2rur	30	0	0	0
3	Mod	Adams	ACF	1f2rur	31	0	0	0
3	Mod	Adams	ACF	2f2urb	1	0	0	0
3	Mod	Adams	ACF	2f2urb	2	0	0	0
3	Mod	Adams	ACF	2f2urb	3	0	0	0
3	Mod	Adams	ACF	2f2urb	4	0	0	0
3	Mod	Adams	ACF	2f2urb	5	0	0	0
3	Mod	Adams	ACF	2f2urb	6	0	0	0
3	Mod	Adams	ACF	2f2urb	7	0	0	0
3	Mod	Adams	ACF	2f2urb	8	0	0	0
3	Mod	Adams	ACF	2f2urb	9	0	0	0
3	Mod	Adams	ACF	2f2urb	10	0	0	0
3	Mod	Adams	ACF	2f2urb	11	0	0	0
3	Mod	Adams	ACF	2f2urb	12	0	0	0
3	Mod	Adams	ACF	2f2urb	13	0	0	0
3	Mod	Adams	ACF	2f2urb	14	0	0	0
3	Mod	Adams	ACF	2f2urb	15	0	0	0
3	Mod	Adams	ACF	2f2urb	16	0	0	0
3	Mod	Adams	ACF	2f2urb	17	0	0	0
3	Mod	Adams	ACF	2f2urb	18	0	0	0
3	Mod	Adams	ACF	2f2urb	19	0	0	0
3	Mod	Adams	ACF	2f2urb	20	0	0	0
3	Mod	Adams	ACF	2f2urb	21	0	0	0
3	Mod	Adams	ACF	2f2urb	22	0	0	0
3	Mod	Adams	ACF	2f2urb	23	0	0	0
3	Mod	Adams	ACF	2f2urb	24	0	0	0
3	Mod	Adams	ACF	2f2urb	25	0	0	0
3	Mod	Adams	ACF	2f2urb	26	0	0	0
3	Mod	Adams	ACF	2f2urb	27	0	0	0
3	Mod	Adams	ACF	2f2urb	28	0	0	0
3	Mod	Adams	ACF	2f2urb	29	0	0	0
3	Mod	Adams	ACF	2f2urb	30	0	0	0
3	Mod	Adams	ACF	2f2urb	31	0	0	0
1	Lim	Adams	ag	1cc	1	-5.56e-05	-3.21e-05	-7.8e-05
1	Lim	Adams	ag	1cc	2	-0.0001101	-6.44e-05	-0.0001591
1	Lim	Adams	ag	1cc	3	-0.0001674	-0.0001007	-0.0002371
1	Lim	Adams	ag	1cc	4	-0.000223	-0.0001359	-0.0003175
1	Lim	Adams	ag	1cc	5	-0.0002768	-0.0001686	-0.0003894
1	Lim	Adams	ag	1cc	6	-0.0003258	-0.0001912	-0.0004613
1	Lim	Adams	ag	1cc	7	-0.0003948	-0.0002354	-0.0005516
1	Lim	Adams	ag	1cc	8	-0.000443	-0.0002511	-0.0006307
1	Lim	Adams	ag	1cc	9	-0.0004956	-0.0003103	-0.0006985
1	Lim	Adams	ag	1cc	10	-0.0005511	-0.0003268	-0.0007785
1	Lim	Adams	ag	1cc	11	-0.0005514	-0.0003347	-0.0007674
1	Lim	Adams	ag	1cc	12	-0.0005526	-0.0003289	-0.000762
1	Lim	Adams	ag	1cc	13	-0.0005536	-0.0003427	-0.0007672
1	Lim	Adams	ag	1cc	14	-0.0005507	-0.0003358	-0.0007802
1	Lim	Adams	ag	1cc	15	-0.0005483	-0.0003225	-0.0007825
1	Lim	Adams	ag	1cc	16	-0.0005582	-0.0003189	-0.0007847
1	Lim	Adams	ag	1cc	17	-0.0005596	-0.0003255	-0.0007756
1	Lim	Adams	ag	1cc	18	-0.0005555	-0.0003273	-0.0007799
1	Lim	Adams	ag	1cc	19	-0.0005557	-0.0003323	-0.0007758
1	Lim	Adams	ag	1cc	20	-0.0005551	-0.0003352	-0.0007803
1	Lim	Adams	ag	1cc	21	-0.0005534	-0.000338	-0.0007579
1	Lim	Adams	ag	1cc	22	-0.000559	-0.0003162	-0.0007739
1	Lim	Adams	ag	1cc	23	-0.0005465	-0.0003393	-0.0007748
1	Lim	Adams	ag	1cc	24	-0.0005517	-0.0003116	-0.00078
1	Lim	Adams	ag	1cc	25	-0.0005533	-0.0003298	-0.0007765
1	Lim	Adams	ag	1cc	26	-0.0005633	-0.0003142	-0.000772
1	Lim	Adams	ag	1cc	27	-0.0005597	-0.0003308	-0.0007846
1	Lim	Adams	ag	1cc	28	-0.0005566	-0.0003121	-0.0007941
1	Lim	Adams	ag	1cc	29	-0.0005486	-0.000324	-0.0007735
1	Lim	Adams	ag	1cc	30	-0.0005512	-0.0003283	-0.0007751
1	Lim	Adams	ag	1cc	31	-0.0005602	-0.0003456	-0.0007742
1	Lim	Adams	ag	2nt	1	-9.36e-05	-4.1e-05	-0.0001468
1	Lim	Adams	ag	2nt	2	-0.0001847	-7.87e-05	-0.0002917
1	Lim	Adams	ag	2nt	3	-0.0002712	-0.0001172	-0.0004391
1	Lim	Adams	ag	2nt	4	-0.0003734	-0.0001675	-0.000585
1	Lim	Adams	ag	2nt	5	-0.0004672	-0.000205	-0.0007378
1	Lim	Adams	ag	2nt	6	-0.000543	-0.000243	-0.000865
1	Lim	Adams	ag	2nt	7	-0.0006652	-0.0002845	-0.0010249
1	Lim	Adams	ag	2nt	8	-0.0007662	-0.0003148	-0.0011761
1	Lim	Adams	ag	2nt	9	-0.0008508	-0.0003637	-0.0013257
1	Lim	Adams	ag	2nt	10	-0.000896	-0.0004025	-0.0014679
1	Lim	Adams	ag	2nt	11	-0.0009729	-0.0004106	-0.0014733
1	Lim	Adams	ag	2nt	12	-0.0009355	-0.0004027	-0.0014742
1	Lim	Adams	ag	2nt	13	-0.0009354	-0.0004113	-0.0014631
1	Lim	Adams	ag	2nt	14	-0.0009294	-0.0004089	-0.0014636
1	Lim	Adams	ag	2nt	15	-0.0009229	-0.0003855	-0.0014553
1	Lim	Adams	ag	2nt	16	-0.0009163	-0.0004163	-0.0014677
1	Lim	Adams	ag	2nt	17	-0.0009116	-0.0004083	-0.0014516
1	Lim	Adams	ag	2nt	18	-0.0009394	-0.0004064	-0.0014627
1	Lim	Adams	ag	2nt	19	-0.0009214	-0.0003937	-0.0014557
1	Lim	Adams	ag	2nt	20	-0.0009326	-0.0004	-0.0014819
1	Lim	Adams	ag	2nt	21	-0.0009074	-0.0004053	-0.0014583
1	Lim	Adams	ag	2nt	22	-0.0009385	-0.0004051	-0.0014613
1	Lim	Adams	ag	2nt	23	-0.0009492	-0.0004083	-0.0014494
1	Lim	Adams	ag	2nt	24	-0.0009173	-0.0003965	-0.0014713
1	Lim	Adams	ag	2nt	25	-0.0009311	-0.0004046	-0.0014642
1	Lim	Adams	ag	2nt	26	-0.0009431	-0.000403	-0.0014708
1	Lim	Adams	ag	2nt	27	-0.0009505	-0.0004125	-0.0014561
1	Lim	Adams	ag	2nt	28	-0.0009375	-0.0004095	-0.0014752
1	Lim	Adams	ag	2nt	29	-0.0009302	-0.000416	-0.0014682
1	Lim	Adams	ag	2nt	30	-0.0009191	-0.0004007	-0.001465
1	Lim	Adams	ag	2nt	31	-0.0009673	-0.0004314	-0.0014702
1	Lim	Adams	ag	3nm	1	-2.63e-05	-1.6e-05	-3.66e-05
1	Lim	Adams	ag	3nm	2	-5.2e-05	-3.21e-05	-7.36e-05
1	Lim	Adams	ag	3nm	3	-7.86e-05	-4.74e-05	-0.0001094
1	Lim	Adams	ag	3nm	4	-0.0001057	-6.47e-05	-0.0001465
1	Lim	Adams	ag	3nm	5	-0.0001301	-8e-05	-0.0001806
1	Lim	Adams	ag	3nm	6	-0.0001585	-9.66e-05	-0.0002193
1	Lim	Adams	ag	3nm	7	-0.0001833	-0.0001125	-0.0002561
1	Lim	Adams	ag	3nm	8	-0.0002151	-0.0001266	-0.0002933
1	Lim	Adams	ag	3nm	9	-0.0002318	-0.0001432	-0.0003301
1	Lim	Adams	ag	3nm	10	-0.0002646	-0.0001626	-0.0003657
1	Lim	Adams	ag	3nm	11	-0.0002641	-0.0001617	-0.0003683
1	Lim	Adams	ag	3nm	12	-0.0002593	-0.0001584	-0.000364
1	Lim	Adams	ag	3nm	13	-0.0002592	-0.0001579	-0.0003644
1	Lim	Adams	ag	3nm	14	-0.0002625	-0.0001596	-0.0003659
1	Lim	Adams	ag	3nm	15	-0.0002644	-0.0001576	-0.0003652
1	Lim	Adams	ag	3nm	16	-0.0002638	-0.0001617	-0.0003657
1	Lim	Adams	ag	3nm	17	-0.0002604	-0.0001587	-0.0003672
1	Lim	Adams	ag	3nm	18	-0.0002576	-0.0001572	-0.0003662
1	Lim	Adams	ag	3nm	19	-0.0002592	-0.0001593	-0.0003647
1	Lim	Adams	ag	3nm	20	-0.0002647	-0.0001625	-0.0003678
1	Lim	Adams	ag	3nm	21	-0.0002612	-0.0001588	-0.0003666
1	Lim	Adams	ag	3nm	22	-0.0002653	-0.0001604	-0.0003656
1	Lim	Adams	ag	3nm	23	-0.0002636	-0.0001607	-0.0003681
1	Lim	Adams	ag	3nm	24	-0.0002579	-0.0001606	-0.0003642
1	Lim	Adams	ag	3nm	25	-0.0002715	-0.0001635	-0.0003664
1	Lim	Adams	ag	3nm	26	-0.0002575	-0.0001586	-0.0003661
1	Lim	Adams	ag	3nm	27	-0.0002642	-0.0001593	-0.0003689
1	Lim	Adams	ag	3nm	28	-0.0002674	-0.0001612	-0.0003633
1	Lim	Adams	ag	3nm	29	-0.0002636	-0.0001601	-0.0003679
1	Lim	Adams	ag	3nm	30	-0.0002659	-0.0001613	-0.0003666
1	Lim	Adams	ag	3nm	31	-0.0002599	-0.0001621	-0.0003663
2	Amb	Adams	ag	1cc	1	-0.002862	-0.0016925	-0.0040993
2	Amb	Adams	ag	1cc	2	-0.0056353	-0.0033259	-0.0079166
2	Amb	Adams	ag	1cc	3	-0.0086185	-0.0052052	-0.0119169
2	Amb	Adams	ag	1cc	4	-0.0115251	-0.0067542	-0.0161462
2	Amb	Adams	ag	1cc	5	-0.0145082	-0.0087344	-0.0203048
2	Amb	Adams	ag	1cc	6	-0.0173913	-0.0107239	-0.0240659
2	Amb	Adams	ag	1cc	7	-0.0200341	-0.0126018	-0.0281485
2	Amb	Adams	ag	1cc	8	-0.0231448	-0.0142593	-0.0325063
2	Amb	Adams	ag	1cc	9	-0.0256679	-0.0152012	-0.0357641
2	Amb	Adams	ag	1cc	10	-0.0285863	-0.0167558	-0.0402741
2	Amb	Adams	ag	1cc	11	-0.0317121	-0.017273	-0.0452156
2	Amb	Adams	ag	1cc	12	-0.0340296	-0.0202207	-0.0481451
2	Amb	Adams	ag	1cc	13	-0.0369306	-0.0222229	-0.0516839
2	Amb	Adams	ag	1cc	14	-0.0392406	-0.023591	-0.0561112
2	Amb	Adams	ag	1cc	15	-0.0427741	-0.0254742	-0.0606257
2	Amb	Adams	ag	1cc	16	-0.0463139	-0.0273189	-0.064437
2	Amb	Adams	ag	1cc	17	-0.0490193	-0.0265553	-0.0667331
2	Amb	Adams	ag	1cc	18	-0.0516894	-0.0293633	-0.0722773
2	Amb	Adams	ag	1cc	19	-0.0543568	-0.033038	-0.0775499
2	Amb	Adams	ag	1cc	20	-0.0581207	-0.0343723	-0.079053
2	Amb	Adams	ag	1cc	21	-0.0607148	-0.035213	-0.0843126
2	Amb	Adams	ag	1cc	22	-0.0636858	-0.0392975	-0.0893465
2	Amb	Adams	ag	1cc	23	-0.066425	-0.0404237	-0.0922911
2	Amb	Adams	ag	1cc	24	-0.0681851	-0.0391262	-0.0970075
2	Amb	Adams	ag	1cc	25	-0.0714878	-0.0427763	-0.100157
2	Amb	Adams	ag	1cc	26	-0.0746819	-0.0440433	-0.106119
2	Amb	Adams	ag	1cc	27	-0.0774502	-0.0466956	-0.108852
2	Amb	Adams	ag	1cc	28	-0.0797706	-0.0488523	-0.112072
2	Amb	Adams	ag	1cc	29	-0.0819035	-0.0498932	-0.115225
2	Amb	Adams	ag	1cc	30	-0.0858981	-0.0529841	-0.120927
2	Amb	Adams	ag	1cc	31	-0.0893702	-0.0545748	-0.124805
2	Amb	Adams	ag	2nt	1	-0.0010854	-0.0004611	-0.0017233
2	Amb	Adams	ag	2nt	2	-0.0022291	-0.0009912	-0.0034797
2	Amb	Adams	ag	2nt	3	-0.0030768	-0.0014323	-0.0051391
2	Amb	Adams	ag	2nt	4	-0.0044273	-0.001912	-0.0069622
2	Amb	Adams	ag	2nt	5	-0.0054692	-0.0023669	-0.0085854
2	Amb	Adams	ag	2nt	6	-0.0064758	-0.0028239	-0.0103851
2	Amb	Adams	ag	2nt	7	-0.0076248	-0.0032758	-0.0120798
2	Amb	Adams	ag	2nt	8	-0.0086316	-0.0036593	-0.0138559
2	Amb	Adams	ag	2nt	9	-0.009891	-0.0044279	-0.0155229
2	Amb	Adams	ag	2nt	10	-0.011057	-0.0047803	-0.0172501
2	Amb	Adams	ag	2nt	11	-0.0119231	-0.0052408	-0.0190572
2	Amb	Adams	ag	2nt	12	-0.0132566	-0.0057387	-0.0205809
2	Amb	Adams	ag	2nt	13	-0.0139094	-0.0061899	-0.0224072
2	Amb	Adams	ag	2nt	14	-0.0154651	-0.0066406	-0.0244266
2	Amb	Adams	ag	2nt	15	-0.0164841	-0.0071836	-0.0255564
2	Amb	Adams	ag	2nt	16	-0.0182059	-0.0075681	-0.0274391
2	Amb	Adams	ag	2nt	17	-0.0189317	-0.0078412	-0.0293665
2	Amb	Adams	ag	2nt	18	-0.019636	-0.0084719	-0.0311651
2	Amb	Adams	ag	2nt	19	-0.0208451	-0.0087339	-0.0324327
2	Amb	Adams	ag	2nt	20	-0.0217942	-0.0094873	-0.0346044
2	Amb	Adams	ag	2nt	21	-0.0229134	-0.0099084	-0.0358532
2	Amb	Adams	ag	2nt	22	-0.0245101	-0.0106623	-0.0379857
2	Amb	Adams	ag	2nt	23	-0.0262984	-0.0113128	-0.0398435
2	Amb	Adams	ag	2nt	24	-0.0252536	-0.0114518	-0.0409147
2	Amb	Adams	ag	2nt	25	-0.028572	-0.012123	-0.0431409
2	Amb	Adams	ag	2nt	26	-0.0296865	-0.0125235	-0.0447115
2	Amb	Adams	ag	2nt	27	-0.0288648	-0.0126932	-0.0469891
2	Amb	Adams	ag	2nt	28	-0.0311766	-0.0134339	-0.0483823
2	Amb	Adams	ag	2nt	29	-0.0310536	-0.0140463	-0.0500613
2	Amb	Adams	ag	2nt	30	-0.0330208	-0.0142775	-0.0512465
2	Amb	Adams	ag	2nt	31	-0.0334305	-0.0148616	-0.0529302
2	Amb	Adams	ag	3nm	1	-0.003714	-0.0021873	-0.0050641
2	Amb	Adams	ag	3nm	2	-0.0072988	-0.004425	-0.0100395
2	Amb	Adams	ag	3nm	3	-0.0108212	-0.0066333	-0.0151579
2	Amb	Adams	ag	3nm	4	-0.0146784	-0.008772	-0.0202495
2	Amb	Adams	ag	3nm	5	-0.018046	-0.0108927	-0.0249614
2	Amb	Adams	ag	3nm	6	-0.0216326	-0.0131502	-0.030278
2	Amb	Adams	ag	3nm	7	-0.0254287	-0.0154851	-0.0352398
2	Amb	Adams	ag	3nm	8	-0.0291829	-0.017527	-0.0402557
2	Amb	Adams	ag	3nm	9	-0.0324076	-0.0197511	-0.0451647
2	Amb	Adams	ag	3nm	10	-0.0358695	-0.0222936	-0.0505563
2	Amb	Adams	ag	3nm	11	-0.0364606	-0.0219042	-0.050713
2	Amb	Adams	ag	3nm	12	-0.0368516	-0.0222686	-0.0506849
2	Amb	Adams	ag	3nm	13	-0.0362429	-0.0220234	-0.0503723
2	Amb	Adams	ag	3nm	14	-0.0352525	-0.0217139	-0.0502557
2	Amb	Adams	ag	3nm	15	-0.0369902	-0.0219223	-0.0506287
2	Amb	Adams	ag	3nm	16	-0.0361233	-0.0222244	-0.0501129
2	Amb	Adams	ag	3nm	17	-0.0366095	-0.0219811	-0.0504134
2	Amb	Adams	ag	3nm	18	-0.0361535	-0.022467	-0.0505049
2	Amb	Adams	ag	3nm	19	-0.0362415	-0.0224911	-0.0502412
2	Amb	Adams	ag	3nm	20	-0.0375189	-0.0219389	-0.050708
2	Amb	Adams	ag	3nm	21	-0.0358923	-0.0220859	-0.0502336
2	Amb	Adams	ag	3nm	22	-0.0361545	-0.0217842	-0.0505705
2	Amb	Adams	ag	3nm	23	-0.0364948	-0.0221839	-0.0505686
2	Amb	Adams	ag	3nm	24	-0.0364175	-0.0224562	-0.0505882
2	Amb	Adams	ag	3nm	25	-0.0363194	-0.0223505	-0.0500318
2	Amb	Adams	ag	3nm	26	-0.0368745	-0.0219241	-0.0506076
2	Amb	Adams	ag	3nm	27	-0.0359178	-0.022085	-0.0507317
2	Amb	Adams	ag	3nm	28	-0.0369813	-0.0219761	-0.0507285
2	Amb	Adams	ag	3nm	29	-0.0354421	-0.0224511	-0.0505552
2	Amb	Adams	ag	3nm	30	-0.0360796	-0.0219015	-0.0504525
2	Amb	Adams	ag	3nm	31	-0.0363774	-0.0219255	-0.0503278
3	Mod	Adams	ag	1cc	1	-0.0002063	-0.0001168	-0.0002887
3	Mod	Adams	ag	1cc	2	-0.0004205	-0.0002466	-0.0005843
3	Mod	Adams	ag	1cc	3	-0.0006272	-0.0003701	-0.0008745
3	Mod	Adams	ag	1cc	4	-0.0008406	-0.0005011	-0.0011611
3	Mod	Adams	ag	1cc	5	-0.0010463	-0.0006402	-0.0014866
3	Mod	Adams	ag	1cc	6	-0.0012564	-0.000706	-0.0017601
3	Mod	Adams	ag	1cc	7	-0.0014286	-0.0008436	-0.0020614
3	Mod	Adams	ag	1cc	8	-0.0016626	-0.00101	-0.0023506
3	Mod	Adams	ag	1cc	9	-0.0018632	-0.0011034	-0.0026644
3	Mod	Adams	ag	1cc	10	-0.0020989	-0.0012468	-0.0030043
3	Mod	Adams	ag	1cc	11	-0.0022478	-0.0013114	-0.0031505
3	Mod	Adams	ag	1cc	12	-0.0024256	-0.0015	-0.0033782
3	Mod	Adams	ag	1cc	13	-0.0026034	-0.0015521	-0.003572
3	Mod	Adams	ag	1cc	14	-0.0027744	-0.0015965	-0.0039794
3	Mod	Adams	ag	1cc	15	-0.0029149	-0.0017734	-0.0041697
3	Mod	Adams	ag	1cc	16	-0.0031495	-0.0019137	-0.0042939
3	Mod	Adams	ag	1cc	17	-0.0033028	-0.0019164	-0.0045592
3	Mod	Adams	ag	1cc	18	-0.0034802	-0.0020606	-0.0048711
3	Mod	Adams	ag	1cc	19	-0.0036282	-0.0021493	-0.0051139
3	Mod	Adams	ag	1cc	20	-0.0038195	-0.0022794	-0.0054821
3	Mod	Adams	ag	1cc	21	-0.0040129	-0.0023873	-0.005552
3	Mod	Adams	ag	1cc	22	-0.0041714	-0.0023857	-0.0058869
3	Mod	Adams	ag	1cc	23	-0.004326	-0.0024958	-0.006014
3	Mod	Adams	ag	1cc	24	-0.0045196	-0.0026731	-0.0063407
3	Mod	Adams	ag	1cc	25	-0.0047367	-0.0025986	-0.0065026
3	Mod	Adams	ag	1cc	26	-0.0047593	-0.0029026	-0.0068662
3	Mod	Adams	ag	1cc	27	-0.0050177	-0.0030549	-0.0068507
3	Mod	Adams	ag	1cc	28	-0.0051607	-0.0030805	-0.00746
3	Mod	Adams	ag	1cc	29	-0.0052719	-0.0031269	-0.0074007
3	Mod	Adams	ag	1cc	30	-0.0055946	-0.0032046	-0.0078473
3	Mod	Adams	ag	1cc	31	-0.0057486	-0.0032681	-0.008068
3	Mod	Adams	ag	2nt	1	-0.0003017	-0.0001331	-0.0004899
3	Mod	Adams	ag	2nt	2	-0.0006276	-0.0002792	-0.0009764
3	Mod	Adams	ag	2nt	3	-0.0009373	-0.0004068	-0.001466
3	Mod	Adams	ag	2nt	4	-0.0012966	-0.0005366	-0.0019444
3	Mod	Adams	ag	2nt	5	-0.0015851	-0.0006845	-0.0024557
3	Mod	Adams	ag	2nt	6	-0.0018891	-0.0007996	-0.0029311
3	Mod	Adams	ag	2nt	7	-0.0021606	-0.0009135	-0.0034382
3	Mod	Adams	ag	2nt	8	-0.0024521	-0.0010681	-0.0039001
3	Mod	Adams	ag	2nt	9	-0.0028694	-0.0012266	-0.0043831
3	Mod	Adams	ag	2nt	10	-0.0030264	-0.0013077	-0.0049322
3	Mod	Adams	ag	2nt	11	-0.0047221	-0.002025	-0.0073206
3	Mod	Adams	ag	2nt	12	-0.0047687	-0.00196	-0.0073375
3	Mod	Adams	ag	2nt	13	-0.0047358	-0.0020125	-0.0073607
3	Mod	Adams	ag	2nt	14	-0.004679	-0.0020528	-0.0073353
3	Mod	Adams	ag	2nt	15	-0.0045753	-0.0019655	-0.0072756
3	Mod	Adams	ag	2nt	16	-0.0046093	-0.0020317	-0.0073728
3	Mod	Adams	ag	2nt	17	-0.0046794	-0.0020225	-0.0073634
3	Mod	Adams	ag	2nt	18	-0.0048255	-0.002057	-0.0073127
3	Mod	Adams	ag	2nt	19	-0.0047565	-0.0020574	-0.0073066
3	Mod	Adams	ag	2nt	20	-0.00473	-0.0020932	-0.0072726
3	Mod	Adams	ag	2nt	21	-0.0048444	-0.0019813	-0.007313
3	Mod	Adams	ag	2nt	22	-0.0046858	-0.0020357	-0.0073734
3	Mod	Adams	ag	2nt	23	-0.0047571	-0.0019928	-0.0073446
3	Mod	Adams	ag	2nt	24	-0.0046092	-0.0020048	-0.0071685
3	Mod	Adams	ag	2nt	25	-0.0046206	-0.0019859	-0.0073047
3	Mod	Adams	ag	2nt	26	-0.0047748	-0.0020092	-0.0073117
3	Mod	Adams	ag	2nt	27	-0.0045998	-0.0019693	-0.0072705
3	Mod	Adams	ag	2nt	28	-0.0047619	-0.0020437	-0.0073347
3	Mod	Adams	ag	2nt	29	-0.0047809	-0.0020265	-0.0072881
3	Mod	Adams	ag	2nt	30	-0.004571	-0.002022	-0.007241
3	Mod	Adams	ag	2nt	31	-0.0044903	-0.0020063	-0.007311
3	Mod	Adams	ag	3nm	1	-0.000882	-0.0005527	-0.0012648
3	Mod	Adams	ag	3nm	2	-0.0018355	-0.001134	-0.0024947
3	Mod	Adams	ag	3nm	3	-0.0027112	-0.0016529	-0.0037692
3	Mod	Adams	ag	3nm	4	-0.0036255	-0.002235	-0.0050587
3	Mod	Adams	ag	3nm	5	-0.0045883	-0.0028335	-0.0063032
3	Mod	Adams	ag	3nm	6	-0.0055949	-0.0033183	-0.0075982
3	Mod	Adams	ag	3nm	7	-0.0062288	-0.0038392	-0.0088657
3	Mod	Adams	ag	3nm	8	-0.0073149	-0.0043863	-0.0100906
3	Mod	Adams	ag	3nm	9	-0.0079926	-0.004929	-0.0113203
3	Mod	Adams	ag	3nm	10	-0.0092023	-0.0055435	-0.0126093
3	Mod	Adams	ag	3nm	11	-0.0097433	-0.0058648	-0.0134148
3	Mod	Adams	ag	3nm	12	-0.0103401	-0.0063046	-0.014499
3	Mod	Adams	ag	3nm	13	-0.0109711	-0.0066909	-0.0153416
3	Mod	Adams	ag	3nm	14	-0.0114981	-0.0070793	-0.0161228
3	Mod	Adams	ag	3nm	15	-0.0122038	-0.0074847	-0.0170993
3	Mod	Adams	ag	3nm	16	-0.0129539	-0.0078173	-0.0180091
3	Mod	Adams	ag	3nm	17	-0.013567	-0.008333	-0.0188389
3	Mod	Adams	ag	3nm	18	-0.0144474	-0.0086274	-0.0198575
3	Mod	Adams	ag	3nm	19	-0.0150443	-0.0089308	-0.0206468
3	Mod	Adams	ag	3nm	20	-0.0158203	-0.0094399	-0.0216711
3	Mod	Adams	ag	3nm	21	-0.015999	-0.0099128	-0.0225676
3	Mod	Adams	ag	3nm	22	-0.0169105	-0.010327	-0.0235695
3	Mod	Adams	ag	3nm	23	-0.0173183	-0.0106178	-0.024281
3	Mod	Adams	ag	3nm	24	-0.0188036	-0.0110971	-0.0253688
3	Mod	Adams	ag	3nm	25	-0.0186004	-0.0114203	-0.0261616
3	Mod	Adams	ag	3nm	26	-0.0197915	-0.0118099	-0.0270257
3	Mod	Adams	ag	3nm	27	-0.0200189	-0.0124521	-0.0279847
3	Mod	Adams	ag	3nm	28	-0.020407	-0.0125734	-0.0288618
3	Mod	Adams	ag	3nm	29	-0.0216374	-0.0128307	-0.0298391
3	Mod	Adams	ag	3nm	30	-0.0220124	-0.0134578	-0.0305631
3	Mod	Adams	ag	3nm	31	-0.0223854	-0.0137266	-0.0314873
1	Lim	Adams	grass	1grass	1	-7.4e-06	-6.2e-06	-8.6e-06
1	Lim	Adams	grass	1grass	2	-1.48e-05	-1.23e-05	-1.71e-05
1	Lim	Adams	grass	1grass	3	-2.2e-05	-1.85e-05	-2.56e-05
1	Lim	Adams	grass	1grass	4	-2.93e-05	-2.43e-05	-3.4e-05
1	Lim	Adams	grass	1grass	5	-3.67e-05	-3.1e-05	-4.29e-05
1	Lim	Adams	grass	1grass	6	-4.43e-05	-3.67e-05	-5.18e-05
1	Lim	Adams	grass	1grass	7	-5.16e-05	-4.32e-05	-6.03e-05
1	Lim	Adams	grass	1grass	8	-5.87e-05	-4.86e-05	-6.87e-05
1	Lim	Adams	grass	1grass	9	-6.62e-05	-5.48e-05	-7.64e-05
1	Lim	Adams	grass	1grass	10	-7.42e-05	-6.2e-05	-8.61e-05
1	Lim	Adams	grass	1grass	11	-7.34e-05	-6.23e-05	-8.55e-05
1	Lim	Adams	grass	1grass	12	-7.36e-05	-6.12e-05	-8.55e-05
1	Lim	Adams	grass	1grass	13	-7.34e-05	-6.26e-05	-8.57e-05
1	Lim	Adams	grass	1grass	14	-7.35e-05	-6.05e-05	-8.6e-05
1	Lim	Adams	grass	1grass	15	-7.35e-05	-6.15e-05	-8.62e-05
1	Lim	Adams	grass	1grass	16	-7.31e-05	-6.15e-05	-8.66e-05
1	Lim	Adams	grass	1grass	17	-7.36e-05	-6.15e-05	-8.65e-05
1	Lim	Adams	grass	1grass	18	-7.39e-05	-6.2e-05	-8.53e-05
1	Lim	Adams	grass	1grass	19	-7.36e-05	-6.13e-05	-8.53e-05
1	Lim	Adams	grass	1grass	20	-7.35e-05	-6.08e-05	-8.53e-05
1	Lim	Adams	grass	1grass	21	-7.41e-05	-6.25e-05	-8.58e-05
1	Lim	Adams	grass	1grass	22	-7.4e-05	-6.15e-05	-8.51e-05
1	Lim	Adams	grass	1grass	23	-7.35e-05	-6.11e-05	-8.59e-05
1	Lim	Adams	grass	1grass	24	-7.38e-05	-6.24e-05	-8.57e-05
1	Lim	Adams	grass	1grass	25	-7.35e-05	-6.12e-05	-8.52e-05
1	Lim	Adams	grass	1grass	26	-7.39e-05	-6.16e-05	-8.45e-05
1	Lim	Adams	grass	1grass	27	-7.28e-05	-6.18e-05	-8.51e-05
1	Lim	Adams	grass	1grass	28	-7.39e-05	-6.19e-05	-8.59e-05
1	Lim	Adams	grass	1grass	29	-7.35e-05	-6.16e-05	-8.46e-05
1	Lim	Adams	grass	1grass	30	-7.35e-05	-6.17e-05	-8.57e-05
1	Lim	Adams	grass	1grass	31	-7.32e-05	-6.11e-05	-8.57e-05
2	Amb	Adams	grass	1grass	1	-7.42e-05	-6.16e-05	-8.52e-05
2	Amb	Adams	grass	1grass	2	-0.0001473	-0.0001231	-0.0001705
2	Amb	Adams	grass	1grass	3	-0.0002205	-0.0001817	-0.0002554
2	Amb	Adams	grass	1grass	4	-0.0002954	-0.0002477	-0.0003403
2	Amb	Adams	grass	1grass	5	-0.000367	-0.0003117	-0.0004321
2	Amb	Adams	grass	1grass	6	-0.0004402	-0.0003692	-0.000514
2	Amb	Adams	grass	1grass	7	-0.0005139	-0.0004293	-0.0006012
2	Amb	Adams	grass	1grass	8	-0.0005901	-0.0004889	-0.0006818
2	Amb	Adams	grass	1grass	9	-0.0006622	-0.0005487	-0.0007694
2	Amb	Adams	grass	1grass	10	-0.0007391	-0.0006114	-0.0008592
2	Amb	Adams	grass	1grass	11	-0.0007358	-0.0006199	-0.0008493
2	Amb	Adams	grass	1grass	12	-0.0007386	-0.0006196	-0.0008494
2	Amb	Adams	grass	1grass	13	-0.0007329	-0.0006163	-0.0008459
2	Amb	Adams	grass	1grass	14	-0.0007372	-0.0006173	-0.0008619
2	Amb	Adams	grass	1grass	15	-0.0007352	-0.0006124	-0.0008485
2	Amb	Adams	grass	1grass	16	-0.0007305	-0.0006157	-0.000854
2	Amb	Adams	grass	1grass	17	-0.0007394	-0.0006148	-0.0008552
2	Amb	Adams	grass	1grass	18	-0.0007375	-0.0006134	-0.000861
2	Amb	Adams	grass	1grass	19	-0.0007379	-0.000614	-0.0008544
2	Amb	Adams	grass	1grass	20	-0.0007372	-0.0006112	-0.0008515
2	Amb	Adams	grass	1grass	21	-0.0007303	-0.0006096	-0.0008476
2	Amb	Adams	grass	1grass	22	-0.0007347	-0.0006167	-0.0008545
2	Amb	Adams	grass	1grass	23	-0.0007353	-0.0006133	-0.0008618
2	Amb	Adams	grass	1grass	24	-0.0007376	-0.0006156	-0.0008615
2	Amb	Adams	grass	1grass	25	-0.0007324	-0.0006198	-0.0008559
2	Amb	Adams	grass	1grass	26	-0.000739	-0.0006168	-0.0008596
2	Amb	Adams	grass	1grass	27	-0.0007365	-0.0006132	-0.0008645
2	Amb	Adams	grass	1grass	28	-0.0007369	-0.0006172	-0.0008562
2	Amb	Adams	grass	1grass	29	-0.0007379	-0.0006219	-0.0008632
2	Amb	Adams	grass	1grass	30	-0.0007354	-0.0006139	-0.000857
2	Amb	Adams	grass	1grass	31	-0.0007352	-0.0006116	-0.0008539
3	Mod	Adams	grass	1grass	1	-3.68e-05	-3.09e-05	-4.29e-05
3	Mod	Adams	grass	1grass	2	-7.35e-05	-6.08e-05	-8.56e-05
3	Mod	Adams	grass	1grass	3	-0.0001104	-9.33e-05	-0.0001278
3	Mod	Adams	grass	1grass	4	-0.0001483	-0.0001253	-0.0001727
3	Mod	Adams	grass	1grass	5	-0.0001845	-0.0001545	-0.0002135
3	Mod	Adams	grass	1grass	6	-0.000221	-0.0001851	-0.0002548
3	Mod	Adams	grass	1grass	7	-0.0002554	-0.0002134	-0.0003021
3	Mod	Adams	grass	1grass	8	-0.0002947	-0.0002461	-0.0003445
3	Mod	Adams	grass	1grass	9	-0.0003303	-0.0002804	-0.0003896
3	Mod	Adams	grass	1grass	10	-0.0003693	-0.0003087	-0.0004265
3	Mod	Adams	grass	1grass	11	-0.0003846	-0.0003263	-0.0004462
3	Mod	Adams	grass	1grass	12	-0.0004038	-0.0003404	-0.000471
3	Mod	Adams	grass	1grass	13	-0.0004218	-0.0003446	-0.0004918
3	Mod	Adams	grass	1grass	14	-0.0004379	-0.0003724	-0.0005085
3	Mod	Adams	grass	1grass	15	-0.0004542	-0.0003809	-0.000526
3	Mod	Adams	grass	1grass	16	-0.0004733	-0.0003997	-0.0005488
3	Mod	Adams	grass	1grass	17	-0.0004919	-0.0004088	-0.000568
3	Mod	Adams	grass	1grass	18	-0.0005079	-0.0004203	-0.0005888
3	Mod	Adams	grass	1grass	19	-0.0005244	-0.0004392	-0.0006099
3	Mod	Adams	grass	1grass	20	-0.0005469	-0.0004599	-0.0006297
3	Mod	Adams	grass	1grass	21	-0.0005582	-0.0004613	-0.0006492
3	Mod	Adams	grass	1grass	22	-0.0005768	-0.0004869	-0.000675
3	Mod	Adams	grass	1grass	23	-0.0005933	-0.0005012	-0.0006937
3	Mod	Adams	grass	1grass	24	-0.0006154	-0.000504	-0.0007156
3	Mod	Adams	grass	1grass	25	-0.000631	-0.0005241	-0.0007302
3	Mod	Adams	grass	1grass	26	-0.000649	-0.0005414	-0.0007568
3	Mod	Adams	grass	1grass	27	-0.000669	-0.0005544	-0.0007788
3	Mod	Adams	grass	1grass	28	-0.0006806	-0.0005758	-0.0007893
3	Mod	Adams	grass	1grass	29	-0.0007023	-0.000583	-0.0008225
3	Mod	Adams	grass	1grass	30	-0.0007219	-0.0006084	-0.0008324
3	Mod	Adams	grass	1grass	31	-0.0007394	-0.0006172	-0.0008577
1	Lim	Adams	ifm	1feder	1	0	0	0
1	Lim	Adams	ifm	1feder	2	0	0	0
1	Lim	Adams	ifm	1feder	3	0	0	0
1	Lim	Adams	ifm	1feder	4	0	0	0
1	Lim	Adams	ifm	1feder	5	0	0	0
1	Lim	Adams	ifm	1feder	6	0	0	0
1	Lim	Adams	ifm	1feder	7	0	0	0
1	Lim	Adams	ifm	1feder	8	0	0	0
1	Lim	Adams	ifm	1feder	9	0	0	0
1	Lim	Adams	ifm	1feder	10	0	0	0
1	Lim	Adams	ifm	1feder	11	0	0	0
1	Lim	Adams	ifm	1feder	12	0	0	0
1	Lim	Adams	ifm	1feder	13	0	0	0
1	Lim	Adams	ifm	1feder	14	0	0	0
1	Lim	Adams	ifm	1feder	15	0	0	0
1	Lim	Adams	ifm	1feder	16	0	0	0
1	Lim	Adams	ifm	1feder	17	0	0	0
1	Lim	Adams	ifm	1feder	18	0	0	0
1	Lim	Adams	ifm	1feder	19	0	0	0
1	Lim	Adams	ifm	1feder	20	0	0	0
1	Lim	Adams	ifm	1feder	21	0	0	0
1	Lim	Adams	ifm	1feder	22	0	0	0
1	Lim	Adams	ifm	1feder	23	0	0	0
1	Lim	Adams	ifm	1feder	24	0	0	0
1	Lim	Adams	ifm	1feder	25	0	0	0
1	Lim	Adams	ifm	1feder	26	0	0	0
1	Lim	Adams	ifm	1feder	27	0	0	0
1	Lim	Adams	ifm	1feder	28	0	0	0
1	Lim	Adams	ifm	1feder	29	0	0	0
1	Lim	Adams	ifm	1feder	30	0	0	0
1	Lim	Adams	ifm	1feder	31	0	0	0
1	Lim	Adams	ifm	2other	1	0	0	0
1	Lim	Adams	ifm	2other	2	0	0	0
1	Lim	Adams	ifm	2other	3	0	0	0
1	Lim	Adams	ifm	2other	4	0	0	0
1	Lim	Adams	ifm	2other	5	0	0	0
1	Lim	Adams	ifm	2other	6	0	0	0
1	Lim	Adams	ifm	2other	7	0	0	0
1	Lim	Adams	ifm	2other	8	0	0	0
1	Lim	Adams	ifm	2other	9	0	0	0
1	Lim	Adams	ifm	2other	10	0	0	0
1	Lim	Adams	ifm	2other	11	0	0	0
1	Lim	Adams	ifm	2other	12	0	0	0
1	Lim	Adams	ifm	2other	13	0	0	0
1	Lim	Adams	ifm	2other	14	0	0	0
1	Lim	Adams	ifm	2other	15	0	0	0
1	Lim	Adams	ifm	2other	16	0	0	0
1	Lim	Adams	ifm	2other	17	0	0	0
1	Lim	Adams	ifm	2other	18	0	0	0
1	Lim	Adams	ifm	2other	19	0	0	0
1	Lim	Adams	ifm	2other	20	0	0	0
1	Lim	Adams	ifm	2other	21	0	0	0
1	Lim	Adams	ifm	2other	22	0	0	0
1	Lim	Adams	ifm	2other	23	0	0	0
1	Lim	Adams	ifm	2other	24	0	0	0
1	Lim	Adams	ifm	2other	25	0	0	0
1	Lim	Adams	ifm	2other	26	0	0	0
1	Lim	Adams	ifm	2other	27	0	0	0
1	Lim	Adams	ifm	2other	28	0	0	0
1	Lim	Adams	ifm	2other	29	0	0	0
1	Lim	Adams	ifm	2other	30	0	0	0
1	Lim	Adams	ifm	2other	31	0	0	0
1	Lim	Adams	ifm	3priva	1	0	0	0
1	Lim	Adams	ifm	3priva	2	0	0	0
1	Lim	Adams	ifm	3priva	3	0	0	0
1	Lim	Adams	ifm	3priva	4	0	0	0
1	Lim	Adams	ifm	3priva	5	0	0	0
1	Lim	Adams	ifm	3priva	6	0	0	0
1	Lim	Adams	ifm	3priva	7	0	0	0
1	Lim	Adams	ifm	3priva	8	0	0	0
1	Lim	Adams	ifm	3priva	9	0	0	0
1	Lim	Adams	ifm	3priva	10	0	0	0
1	Lim	Adams	ifm	3priva	11	0	0	0
1	Lim	Adams	ifm	3priva	12	0	0	0
1	Lim	Adams	ifm	3priva	13	0	0	0
1	Lim	Adams	ifm	3priva	14	0	0	0
1	Lim	Adams	ifm	3priva	15	0	0	0
1	Lim	Adams	ifm	3priva	16	0	0	0
1	Lim	Adams	ifm	3priva	17	0	0	0
1	Lim	Adams	ifm	3priva	18	0	0	0
1	Lim	Adams	ifm	3priva	19	0	0	0
1	Lim	Adams	ifm	3priva	20	0	0	0
1	Lim	Adams	ifm	3priva	21	0	0	0
1	Lim	Adams	ifm	3priva	22	0	0	0
1	Lim	Adams	ifm	3priva	23	0	0	0
1	Lim	Adams	ifm	3priva	24	0	0	0
1	Lim	Adams	ifm	3priva	25	0	0	0
1	Lim	Adams	ifm	3priva	26	0	0	0
1	Lim	Adams	ifm	3priva	27	0	0	0
1	Lim	Adams	ifm	3priva	28	0	0	0
1	Lim	Adams	ifm	3priva	29	0	0	0
1	Lim	Adams	ifm	3priva	30	0	0	0
1	Lim	Adams	ifm	3priva	31	0	0	0
1	Lim	Adams	ifm	4state	1	0	0	0
1	Lim	Adams	ifm	4state	2	0	0	0
1	Lim	Adams	ifm	4state	3	0	0	0
1	Lim	Adams	ifm	4state	4	0	0	0
1	Lim	Adams	ifm	4state	5	0	0	0
1	Lim	Adams	ifm	4state	6	0	0	0
1	Lim	Adams	ifm	4state	7	0	0	0
1	Lim	Adams	ifm	4state	8	0	0	0
1	Lim	Adams	ifm	4state	9	0	0	0
1	Lim	Adams	ifm	4state	10	0	0	0
1	Lim	Adams	ifm	4state	11	0	0	0
1	Lim	Adams	ifm	4state	12	0	0	0
1	Lim	Adams	ifm	4state	13	0	0	0
1	Lim	Adams	ifm	4state	14	0	0	0
1	Lim	Adams	ifm	4state	15	0	0	0
1	Lim	Adams	ifm	4state	16	0	0	0
1	Lim	Adams	ifm	4state	17	0	0	0
1	Lim	Adams	ifm	4state	18	0	0	0
1	Lim	Adams	ifm	4state	19	0	0	0
1	Lim	Adams	ifm	4state	20	0	0	0
1	Lim	Adams	ifm	4state	21	0	0	0
1	Lim	Adams	ifm	4state	22	0	0	0
1	Lim	Adams	ifm	4state	23	0	0	0
1	Lim	Adams	ifm	4state	24	0	0	0
1	Lim	Adams	ifm	4state	25	0	0	0
1	Lim	Adams	ifm	4state	26	0	0	0
1	Lim	Adams	ifm	4state	27	0	0	0
1	Lim	Adams	ifm	4state	28	0	0	0
1	Lim	Adams	ifm	4state	29	0	0	0
1	Lim	Adams	ifm	4state	30	0	0	0
1	Lim	Adams	ifm	4state	31	0	0	0
1	Lim	Adams	ifm	5prseq	1	0	0	0
1	Lim	Adams	ifm	5prseq	2	0	0	0
1	Lim	Adams	ifm	5prseq	3	0	0	0
1	Lim	Adams	ifm	5prseq	4	0	0	0
1	Lim	Adams	ifm	5prseq	5	0	0	0
1	Lim	Adams	ifm	5prseq	6	0	0	0
1	Lim	Adams	ifm	5prseq	7	0	0	0
1	Lim	Adams	ifm	5prseq	8	0	0	0
1	Lim	Adams	ifm	5prseq	9	0	0	0
1	Lim	Adams	ifm	5prseq	10	0	0	0
1	Lim	Adams	ifm	5prseq	11	0	0	0
1	Lim	Adams	ifm	5prseq	12	0	0	0
1	Lim	Adams	ifm	5prseq	13	0	0	0
1	Lim	Adams	ifm	5prseq	14	0	0	0
1	Lim	Adams	ifm	5prseq	15	0	0	0
1	Lim	Adams	ifm	5prseq	16	0	0	0
1	Lim	Adams	ifm	5prseq	17	0	0	0
1	Lim	Adams	ifm	5prseq	18	0	0	0
1	Lim	Adams	ifm	5prseq	19	0	0	0
1	Lim	Adams	ifm	5prseq	20	0	0	0
1	Lim	Adams	ifm	5prseq	21	0	0	0
1	Lim	Adams	ifm	5prseq	22	0	0	0
1	Lim	Adams	ifm	5prseq	23	0	0	0
1	Lim	Adams	ifm	5prseq	24	0	0	0
1	Lim	Adams	ifm	5prseq	25	0	0	0
1	Lim	Adams	ifm	5prseq	26	0	0	0
1	Lim	Adams	ifm	5prseq	27	0	0	0
1	Lim	Adams	ifm	5prseq	28	0	0	0
1	Lim	Adams	ifm	5prseq	29	0	0	0
1	Lim	Adams	ifm	5prseq	30	0	0	0
1	Lim	Adams	ifm	5prseq	31	0	0	0
2	Amb	Adams	ifm	1feder	1	0	0	0
2	Amb	Adams	ifm	1feder	2	0	0	0
2	Amb	Adams	ifm	1feder	3	0	0	0
2	Amb	Adams	ifm	1feder	4	0	0	0
2	Amb	Adams	ifm	1feder	5	0	0	0
2	Amb	Adams	ifm	1feder	6	0	0	0
2	Amb	Adams	ifm	1feder	7	0	0	0
2	Amb	Adams	ifm	1feder	8	0	0	0
2	Amb	Adams	ifm	1feder	9	0	0	0
2	Amb	Adams	ifm	1feder	10	0	0	0
2	Amb	Adams	ifm	1feder	11	0	0	0
2	Amb	Adams	ifm	1feder	12	0	0	0
2	Amb	Adams	ifm	1feder	13	0	0	0
2	Amb	Adams	ifm	1feder	14	0	0	0
2	Amb	Adams	ifm	1feder	15	0	0	0
2	Amb	Adams	ifm	1feder	16	0	0	0
2	Amb	Adams	ifm	1feder	17	0	0	0
2	Amb	Adams	ifm	1feder	18	0	0	0
2	Amb	Adams	ifm	1feder	19	0	0	0
2	Amb	Adams	ifm	1feder	20	0	0	0
2	Amb	Adams	ifm	1feder	21	0	0	0
2	Amb	Adams	ifm	1feder	22	0	0	0
2	Amb	Adams	ifm	1feder	23	0	0	0
2	Amb	Adams	ifm	1feder	24	0	0	0
2	Amb	Adams	ifm	1feder	25	0	0	0
2	Amb	Adams	ifm	1feder	26	0	0	0
2	Amb	Adams	ifm	1feder	27	0	0	0
2	Amb	Adams	ifm	1feder	28	0	0	0
2	Amb	Adams	ifm	1feder	29	0	0	0
2	Amb	Adams	ifm	1feder	30	0	0	0
2	Amb	Adams	ifm	1feder	31	0	0	0
2	Amb	Adams	ifm	2other	1	0	0	0
2	Amb	Adams	ifm	2other	2	0	0	0
2	Amb	Adams	ifm	2other	3	0	0	0
2	Amb	Adams	ifm	2other	4	0	0	0
2	Amb	Adams	ifm	2other	5	0	0	0
2	Amb	Adams	ifm	2other	6	0	0	0
2	Amb	Adams	ifm	2other	7	0	0	0
2	Amb	Adams	ifm	2other	8	0	0	0
2	Amb	Adams	ifm	2other	9	0	0	0
2	Amb	Adams	ifm	2other	10	0	0	0
2	Amb	Adams	ifm	2other	11	0	0	0
2	Amb	Adams	ifm	2other	12	0	0	0
2	Amb	Adams	ifm	2other	13	0	0	0
2	Amb	Adams	ifm	2other	14	0	0	0
2	Amb	Adams	ifm	2other	15	0	0	0
2	Amb	Adams	ifm	2other	16	0	0	0
2	Amb	Adams	ifm	2other	17	0	0	0
2	Amb	Adams	ifm	2other	18	0	0	0
2	Amb	Adams	ifm	2other	19	0	0	0
2	Amb	Adams	ifm	2other	20	0	0	0
2	Amb	Adams	ifm	2other	21	0	0	0
2	Amb	Adams	ifm	2other	22	0	0	0
2	Amb	Adams	ifm	2other	23	0	0	0
2	Amb	Adams	ifm	2other	24	0	0	0
2	Amb	Adams	ifm	2other	25	0	0	0
2	Amb	Adams	ifm	2other	26	0	0	0
2	Amb	Adams	ifm	2other	27	0	0	0
2	Amb	Adams	ifm	2other	28	0	0	0
2	Amb	Adams	ifm	2other	29	0	0	0
2	Amb	Adams	ifm	2other	30	0	0	0
2	Amb	Adams	ifm	2other	31	0	0	0
2	Amb	Adams	ifm	3priva	1	0	0	0
2	Amb	Adams	ifm	3priva	2	0	0	0
2	Amb	Adams	ifm	3priva	3	0	0	0
2	Amb	Adams	ifm	3priva	4	0	0	0
2	Amb	Adams	ifm	3priva	5	0	0	0
2	Amb	Adams	ifm	3priva	6	0	0	0
2	Amb	Adams	ifm	3priva	7	0	0	0
2	Amb	Adams	ifm	3priva	8	0	0	0
2	Amb	Adams	ifm	3priva	9	0	0	0
2	Amb	Adams	ifm	3priva	10	0	0	0
2	Amb	Adams	ifm	3priva	11	0	0	0
2	Amb	Adams	ifm	3priva	12	0	0	0
2	Amb	Adams	ifm	3priva	13	0	0	0
2	Amb	Adams	ifm	3priva	14	0	0	0
2	Amb	Adams	ifm	3priva	15	0	0	0
2	Amb	Adams	ifm	3priva	16	0	0	0
2	Amb	Adams	ifm	3priva	17	0	0	0
2	Amb	Adams	ifm	3priva	18	0	0	0
2	Amb	Adams	ifm	3priva	19	0	0	0
2	Amb	Adams	ifm	3priva	20	0	0	0
2	Amb	Adams	ifm	3priva	21	0	0	0
2	Amb	Adams	ifm	3priva	22	0	0	0
2	Amb	Adams	ifm	3priva	23	0	0	0
2	Amb	Adams	ifm	3priva	24	0	0	0
2	Amb	Adams	ifm	3priva	25	0	0	0
2	Amb	Adams	ifm	3priva	26	0	0	0
2	Amb	Adams	ifm	3priva	27	0	0	0
2	Amb	Adams	ifm	3priva	28	0	0	0
2	Amb	Adams	ifm	3priva	29	0	0	0
2	Amb	Adams	ifm	3priva	30	0	0	0
2	Amb	Adams	ifm	3priva	31	0	0	0
2	Amb	Adams	ifm	4state	1	0	0	0
2	Amb	Adams	ifm	4state	2	0	0	0
2	Amb	Adams	ifm	4state	3	0	0	0
2	Amb	Adams	ifm	4state	4	0	0	0
2	Amb	Adams	ifm	4state	5	0	0	0
2	Amb	Adams	ifm	4state	6	0	0	0
2	Amb	Adams	ifm	4state	7	0	0	0
2	Amb	Adams	ifm	4state	8	0	0	0
2	Amb	Adams	ifm	4state	9	0	0	0
2	Amb	Adams	ifm	4state	10	0	0	0
2	Amb	Adams	ifm	4state	11	0	0	0
2	Amb	Adams	ifm	4state	12	0	0	0
2	Amb	Adams	ifm	4state	13	0	0	0
2	Amb	Adams	ifm	4state	14	0	0	0
2	Amb	Adams	ifm	4state	15	0	0	0
2	Amb	Adams	ifm	4state	16	0	0	0
2	Amb	Adams	ifm	4state	17	0	0	0
2	Amb	Adams	ifm	4state	18	0	0	0
2	Amb	Adams	ifm	4state	19	0	0	0
2	Amb	Adams	ifm	4state	20	0	0	0
2	Amb	Adams	ifm	4state	21	0	0	0
2	Amb	Adams	ifm	4state	22	0	0	0
2	Amb	Adams	ifm	4state	23	0	0	0
2	Amb	Adams	ifm	4state	24	0	0	0
2	Amb	Adams	ifm	4state	25	0	0	0
2	Amb	Adams	ifm	4state	26	0	0	0
2	Amb	Adams	ifm	4state	27	0	0	0
2	Amb	Adams	ifm	4state	28	0	0	0
2	Amb	Adams	ifm	4state	29	0	0	0
2	Amb	Adams	ifm	4state	30	0	0	0
2	Amb	Adams	ifm	4state	31	0	0	0
2	Amb	Adams	ifm	5prseq	1	0	0	0
2	Amb	Adams	ifm	5prseq	2	0	0	0
2	Amb	Adams	ifm	5prseq	3	0	0	0
2	Amb	Adams	ifm	5prseq	4	0	0	0
2	Amb	Adams	ifm	5prseq	5	0	0	0
2	Amb	Adams	ifm	5prseq	6	0	0	0
2	Amb	Adams	ifm	5prseq	7	0	0	0
2	Amb	Adams	ifm	5prseq	8	0	0	0
2	Amb	Adams	ifm	5prseq	9	0	0	0
2	Amb	Adams	ifm	5prseq	10	0	0	0
2	Amb	Adams	ifm	5prseq	11	0	0	0
2	Amb	Adams	ifm	5prseq	12	0	0	0
2	Amb	Adams	ifm	5prseq	13	0	0	0
2	Amb	Adams	ifm	5prseq	14	0	0	0
2	Amb	Adams	ifm	5prseq	15	0	0	0
2	Amb	Adams	ifm	5prseq	16	0	0	0
2	Amb	Adams	ifm	5prseq	17	0	0	0
2	Amb	Adams	ifm	5prseq	18	0	0	0
2	Amb	Adams	ifm	5prseq	19	0	0	0
2	Amb	Adams	ifm	5prseq	20	0	0	0
2	Amb	Adams	ifm	5prseq	21	0	0	0
2	Amb	Adams	ifm	5prseq	22	0	0	0
2	Amb	Adams	ifm	5prseq	23	0	0	0
2	Amb	Adams	ifm	5prseq	24	0	0	0
2	Amb	Adams	ifm	5prseq	25	0	0	0
2	Amb	Adams	ifm	5prseq	26	0	0	0
2	Amb	Adams	ifm	5prseq	27	0	0	0
2	Amb	Adams	ifm	5prseq	28	0	0	0
2	Amb	Adams	ifm	5prseq	29	0	0	0
2	Amb	Adams	ifm	5prseq	30	0	0	0
2	Amb	Adams	ifm	5prseq	31	0	0	0
3	Mod	Adams	ifm	1feder	1	0	0	0
3	Mod	Adams	ifm	1feder	2	0	0	0
3	Mod	Adams	ifm	1feder	3	0	0	0
3	Mod	Adams	ifm	1feder	4	0	0	0
3	Mod	Adams	ifm	1feder	5	0	0	0
3	Mod	Adams	ifm	1feder	6	0	0	0
3	Mod	Adams	ifm	1feder	7	0	0	0
3	Mod	Adams	ifm	1feder	8	0	0	0
3	Mod	Adams	ifm	1feder	9	0	0	0
3	Mod	Adams	ifm	1feder	10	0	0	0
3	Mod	Adams	ifm	1feder	11	0	0	0
3	Mod	Adams	ifm	1feder	12	0	0	0
3	Mod	Adams	ifm	1feder	13	0	0	0
3	Mod	Adams	ifm	1feder	14	0	0	0
3	Mod	Adams	ifm	1feder	15	0	0	0
3	Mod	Adams	ifm	1feder	16	0	0	0
3	Mod	Adams	ifm	1feder	17	0	0	0
3	Mod	Adams	ifm	1feder	18	0	0	0
3	Mod	Adams	ifm	1feder	19	0	0	0
3	Mod	Adams	ifm	1feder	20	0	0	0
3	Mod	Adams	ifm	1feder	21	0	0	0
3	Mod	Adams	ifm	1feder	22	0	0	0
3	Mod	Adams	ifm	1feder	23	0	0	0
3	Mod	Adams	ifm	1feder	24	0	0	0
3	Mod	Adams	ifm	1feder	25	0	0	0
3	Mod	Adams	ifm	1feder	26	0	0	0
3	Mod	Adams	ifm	1feder	27	0	0	0
3	Mod	Adams	ifm	1feder	28	0	0	0
3	Mod	Adams	ifm	1feder	29	0	0	0
3	Mod	Adams	ifm	1feder	30	0	0	0
3	Mod	Adams	ifm	1feder	31	0	0	0
3	Mod	Adams	ifm	2other	1	0	0	0
3	Mod	Adams	ifm	2other	2	0	0	0
3	Mod	Adams	ifm	2other	3	0	0	0
3	Mod	Adams	ifm	2other	4	0	0	0
3	Mod	Adams	ifm	2other	5	0	0	0
3	Mod	Adams	ifm	2other	6	0	0	0
3	Mod	Adams	ifm	2other	7	0	0	0
3	Mod	Adams	ifm	2other	8	0	0	0
3	Mod	Adams	ifm	2other	9	0	0	0
3	Mod	Adams	ifm	2other	10	0	0	0
3	Mod	Adams	ifm	2other	11	0	0	0
3	Mod	Adams	ifm	2other	12	0	0	0
3	Mod	Adams	ifm	2other	13	0	0	0
3	Mod	Adams	ifm	2other	14	0	0	0
3	Mod	Adams	ifm	2other	15	0	0	0
3	Mod	Adams	ifm	2other	16	0	0	0
3	Mod	Adams	ifm	2other	17	0	0	0
3	Mod	Adams	ifm	2other	18	0	0	0
3	Mod	Adams	ifm	2other	19	0	0	0
3	Mod	Adams	ifm	2other	20	0	0	0
3	Mod	Adams	ifm	2other	21	0	0	0
3	Mod	Adams	ifm	2other	22	0	0	0
3	Mod	Adams	ifm	2other	23	0	0	0
3	Mod	Adams	ifm	2other	24	0	0	0
3	Mod	Adams	ifm	2other	25	0	0	0
3	Mod	Adams	ifm	2other	26	0	0	0
3	Mod	Adams	ifm	2other	27	0	0	0
3	Mod	Adams	ifm	2other	28	0	0	0
3	Mod	Adams	ifm	2other	29	0	0	0
3	Mod	Adams	ifm	2other	30	0	0	0
3	Mod	Adams	ifm	2other	31	0	0	0
3	Mod	Adams	ifm	3priva	1	0	0	0
3	Mod	Adams	ifm	3priva	2	0	0	0
3	Mod	Adams	ifm	3priva	3	0	0	0
3	Mod	Adams	ifm	3priva	4	0	0	0
3	Mod	Adams	ifm	3priva	5	0	0	0
3	Mod	Adams	ifm	3priva	6	0	0	0
3	Mod	Adams	ifm	3priva	7	0	0	0
3	Mod	Adams	ifm	3priva	8	0	0	0
3	Mod	Adams	ifm	3priva	9	0	0	0
3	Mod	Adams	ifm	3priva	10	0	0	0
3	Mod	Adams	ifm	3priva	11	0	0	0
3	Mod	Adams	ifm	3priva	12	0	0	0
3	Mod	Adams	ifm	3priva	13	0	0	0
3	Mod	Adams	ifm	3priva	14	0	0	0
3	Mod	Adams	ifm	3priva	15	0	0	0
3	Mod	Adams	ifm	3priva	16	0	0	0
3	Mod	Adams	ifm	3priva	17	0	0	0
3	Mod	Adams	ifm	3priva	18	0	0	0
3	Mod	Adams	ifm	3priva	19	0	0	0
3	Mod	Adams	ifm	3priva	20	0	0	0
3	Mod	Adams	ifm	3priva	21	0	0	0
3	Mod	Adams	ifm	3priva	22	0	0	0
3	Mod	Adams	ifm	3priva	23	0	0	0
3	Mod	Adams	ifm	3priva	24	0	0	0
3	Mod	Adams	ifm	3priva	25	0	0	0
3	Mod	Adams	ifm	3priva	26	0	0	0
3	Mod	Adams	ifm	3priva	27	0	0	0
3	Mod	Adams	ifm	3priva	28	0	0	0
3	Mod	Adams	ifm	3priva	29	0	0	0
3	Mod	Adams	ifm	3priva	30	0	0	0
3	Mod	Adams	ifm	3priva	31	0	0	0
3	Mod	Adams	ifm	4state	1	0	0	0
3	Mod	Adams	ifm	4state	2	0	0	0
3	Mod	Adams	ifm	4state	3	0	0	0
3	Mod	Adams	ifm	4state	4	0	0	0
3	Mod	Adams	ifm	4state	5	0	0	0
3	Mod	Adams	ifm	4state	6	0	0	0
3	Mod	Adams	ifm	4state	7	0	0	0
3	Mod	Adams	ifm	4state	8	0	0	0
3	Mod	Adams	ifm	4state	9	0	0	0
3	Mod	Adams	ifm	4state	10	0	0	0
3	Mod	Adams	ifm	4state	11	0	0	0
3	Mod	Adams	ifm	4state	12	0	0	0
3	Mod	Adams	ifm	4state	13	0	0	0
3	Mod	Adams	ifm	4state	14	0	0	0
3	Mod	Adams	ifm	4state	15	0	0	0
3	Mod	Adams	ifm	4state	16	0	0	0
3	Mod	Adams	ifm	4state	17	0	0	0
3	Mod	Adams	ifm	4state	18	0	0	0
3	Mod	Adams	ifm	4state	19	0	0	0
3	Mod	Adams	ifm	4state	20	0	0	0
3	Mod	Adams	ifm	4state	21	0	0	0
3	Mod	Adams	ifm	4state	22	0	0	0
3	Mod	Adams	ifm	4state	23	0	0	0
3	Mod	Adams	ifm	4state	24	0	0	0
3	Mod	Adams	ifm	4state	25	0	0	0
3	Mod	Adams	ifm	4state	26	0	0	0
3	Mod	Adams	ifm	4state	27	0	0	0
3	Mod	Adams	ifm	4state	28	0	0	0
3	Mod	Adams	ifm	4state	29	0	0	0
3	Mod	Adams	ifm	4state	30	0	0	0
3	Mod	Adams	ifm	4state	31	0	0	0
3	Mod	Adams	ifm	5prseq	1	0	0	0
3	Mod	Adams	ifm	5prseq	2	0	0	0
3	Mod	Adams	ifm	5prseq	3	0	0	0
3	Mod	Adams	ifm	5prseq	4	0	0	0
3	Mod	Adams	ifm	5prseq	5	0	0	0
3	Mod	Adams	ifm	5prseq	6	0	0	0
3	Mod	Adams	ifm	5prseq	7	0	0	0
3	Mod	Adams	ifm	5prseq	8	0	0	0
3	Mod	Adams	ifm	5prseq	9	0	0	0
3	Mod	Adams	ifm	5prseq	10	0	0	0
3	Mod	Adams	ifm	5prseq	11	0	0	0
3	Mod	Adams	ifm	5prseq	12	0	0	0
3	Mod	Adams	ifm	5prseq	13	0	0	0
3	Mod	Adams	ifm	5prseq	14	0	0	0
3	Mod	Adams	ifm	5prseq	15	0	0	0
3	Mod	Adams	ifm	5prseq	16	0	0	0
3	Mod	Adams	ifm	5prseq	17	0	0	0
3	Mod	Adams	ifm	5prseq	18	0	0	0
3	Mod	Adams	ifm	5prseq	19	0	0	0
3	Mod	Adams	ifm	5prseq	20	0	0	0
3	Mod	Adams	ifm	5prseq	21	0	0	0
3	Mod	Adams	ifm	5prseq	22	0	0	0
3	Mod	Adams	ifm	5prseq	23	0	0	0
3	Mod	Adams	ifm	5prseq	24	0	0	0
3	Mod	Adams	ifm	5prseq	25	0	0	0
3	Mod	Adams	ifm	5prseq	26	0	0	0
3	Mod	Adams	ifm	5prseq	27	0	0	0
3	Mod	Adams	ifm	5prseq	28	0	0	0
3	Mod	Adams	ifm	5prseq	29	0	0	0
3	Mod	Adams	ifm	5prseq	30	0	0	0
3	Mod	Adams	ifm	5prseq	31	0	0	0
1	Lim	Adams	reforest	1intensL	1	0	0	0
1	Lim	Adams	reforest	1intensL	2	0	0	0
1	Lim	Adams	reforest	1intensL	3	0	0	0
1	Lim	Adams	reforest	1intensL	4	0	0	0
1	Lim	Adams	reforest	1intensL	5	0	0	0
1	Lim	Adams	reforest	1intensL	6	0	0	0
1	Lim	Adams	reforest	1intensL	7	0	0	0
1	Lim	Adams	reforest	1intensL	8	0	0	0
1	Lim	Adams	reforest	1intensL	9	0	0	0
1	Lim	Adams	reforest	1intensL	10	0	0	0
1	Lim	Adams	reforest	1intensL	11	0	0	0
1	Lim	Adams	reforest	1intensL	12	0	0	0
1	Lim	Adams	reforest	1intensL	13	0	0	0
1	Lim	Adams	reforest	1intensL	14	0	0	0
1	Lim	Adams	reforest	1intensL	15	0	0	0
1	Lim	Adams	reforest	1intensL	16	0	0	0
1	Lim	Adams	reforest	1intensL	17	0	0	0
1	Lim	Adams	reforest	1intensL	18	0	0	0
1	Lim	Adams	reforest	1intensL	19	0	0	0
1	Lim	Adams	reforest	1intensL	20	0	0	0
1	Lim	Adams	reforest	1intensL	21	0	0	0
1	Lim	Adams	reforest	1intensL	22	0	0	0
1	Lim	Adams	reforest	1intensL	23	0	0	0
1	Lim	Adams	reforest	1intensL	24	0	0	0
1	Lim	Adams	reforest	1intensL	25	0	0	0
1	Lim	Adams	reforest	1intensL	26	0	0	0
1	Lim	Adams	reforest	1intensL	27	0	0	0
1	Lim	Adams	reforest	1intensL	28	0	0	0
1	Lim	Adams	reforest	1intensL	29	0	0	0
1	Lim	Adams	reforest	1intensL	30	0	0	0
1	Lim	Adams	reforest	1intensL	31	0	0	0
1	Lim	Adams	reforest	2intensM	1	0	0	0
1	Lim	Adams	reforest	2intensM	2	0	0	0
1	Lim	Adams	reforest	2intensM	3	0	0	0
1	Lim	Adams	reforest	2intensM	4	0	0	0
1	Lim	Adams	reforest	2intensM	5	0	0	0
1	Lim	Adams	reforest	2intensM	6	0	0	0
1	Lim	Adams	reforest	2intensM	7	0	0	0
1	Lim	Adams	reforest	2intensM	8	0	0	0
1	Lim	Adams	reforest	2intensM	9	0	0	0
1	Lim	Adams	reforest	2intensM	10	0	0	0
1	Lim	Adams	reforest	2intensM	11	0	0	0
1	Lim	Adams	reforest	2intensM	12	0	0	0
1	Lim	Adams	reforest	2intensM	13	0	0	0
1	Lim	Adams	reforest	2intensM	14	0	0	0
1	Lim	Adams	reforest	2intensM	15	0	0	0
1	Lim	Adams	reforest	2intensM	16	0	0	0
1	Lim	Adams	reforest	2intensM	17	0	0	0
1	Lim	Adams	reforest	2intensM	18	0	0	0
1	Lim	Adams	reforest	2intensM	19	0	0	0
1	Lim	Adams	reforest	2intensM	20	0	0	0
1	Lim	Adams	reforest	2intensM	21	0	0	0
1	Lim	Adams	reforest	2intensM	22	0	0	0
1	Lim	Adams	reforest	2intensM	23	0	0	0
1	Lim	Adams	reforest	2intensM	24	0	0	0
1	Lim	Adams	reforest	2intensM	25	0	0	0
1	Lim	Adams	reforest	2intensM	26	0	0	0
1	Lim	Adams	reforest	2intensM	27	0	0	0
1	Lim	Adams	reforest	2intensM	28	0	0	0
1	Lim	Adams	reforest	2intensM	29	0	0	0
1	Lim	Adams	reforest	2intensM	30	0	0	0
1	Lim	Adams	reforest	2intensM	31	0	0	0
1	Lim	Adams	reforest	3intensH	1	0	0	0
1	Lim	Adams	reforest	3intensH	2	0	0	0
1	Lim	Adams	reforest	3intensH	3	0	0	0
1	Lim	Adams	reforest	3intensH	4	0	0	0
1	Lim	Adams	reforest	3intensH	5	0	0	0
1	Lim	Adams	reforest	3intensH	6	0	0	0
1	Lim	Adams	reforest	3intensH	7	0	0	0
1	Lim	Adams	reforest	3intensH	8	0	0	0
1	Lim	Adams	reforest	3intensH	9	0	0	0
1	Lim	Adams	reforest	3intensH	10	0	0	0
1	Lim	Adams	reforest	3intensH	11	0	0	0
1	Lim	Adams	reforest	3intensH	12	0	0	0
1	Lim	Adams	reforest	3intensH	13	0	0	0
1	Lim	Adams	reforest	3intensH	14	0	0	0
1	Lim	Adams	reforest	3intensH	15	0	0	0
1	Lim	Adams	reforest	3intensH	16	0	0	0
1	Lim	Adams	reforest	3intensH	17	0	0	0
1	Lim	Adams	reforest	3intensH	18	0	0	0
1	Lim	Adams	reforest	3intensH	19	0	0	0
1	Lim	Adams	reforest	3intensH	20	0	0	0
1	Lim	Adams	reforest	3intensH	21	0	0	0
1	Lim	Adams	reforest	3intensH	22	0	0	0
1	Lim	Adams	reforest	3intensH	23	0	0	0
1	Lim	Adams	reforest	3intensH	24	0	0	0
1	Lim	Adams	reforest	3intensH	25	0	0	0
1	Lim	Adams	reforest	3intensH	26	0	0	0
1	Lim	Adams	reforest	3intensH	27	0	0	0
1	Lim	Adams	reforest	3intensH	28	0	0	0
1	Lim	Adams	reforest	3intensH	29	0	0	0
1	Lim	Adams	reforest	3intensH	30	0	0	0
1	Lim	Adams	reforest	3intensH	31	0	0	0
2	Amb	Adams	reforest	1intensL	1	0	0	0
2	Amb	Adams	reforest	1intensL	2	0	0	0
2	Amb	Adams	reforest	1intensL	3	0	0	0
2	Amb	Adams	reforest	1intensL	4	0	0	0
2	Amb	Adams	reforest	1intensL	5	0	0	0
2	Amb	Adams	reforest	1intensL	6	0	0	0
2	Amb	Adams	reforest	1intensL	7	0	0	0
2	Amb	Adams	reforest	1intensL	8	0	0	0
2	Amb	Adams	reforest	1intensL	9	0	0	0
2	Amb	Adams	reforest	1intensL	10	0	0	0
2	Amb	Adams	reforest	1intensL	11	0	0	0
2	Amb	Adams	reforest	1intensL	12	0	0	0
2	Amb	Adams	reforest	1intensL	13	0	0	0
2	Amb	Adams	reforest	1intensL	14	0	0	0
2	Amb	Adams	reforest	1intensL	15	0	0	0
2	Amb	Adams	reforest	1intensL	16	0	0	0
2	Amb	Adams	reforest	1intensL	17	0	0	0
2	Amb	Adams	reforest	1intensL	18	0	0	0
2	Amb	Adams	reforest	1intensL	19	0	0	0
2	Amb	Adams	reforest	1intensL	20	0	0	0
2	Amb	Adams	reforest	1intensL	21	0	0	0
2	Amb	Adams	reforest	1intensL	22	0	0	0
2	Amb	Adams	reforest	1intensL	23	0	0	0
2	Amb	Adams	reforest	1intensL	24	0	0	0
2	Amb	Adams	reforest	1intensL	25	0	0	0
2	Amb	Adams	reforest	1intensL	26	0	0	0
2	Amb	Adams	reforest	1intensL	27	0	0	0
2	Amb	Adams	reforest	1intensL	28	0	0	0
2	Amb	Adams	reforest	1intensL	29	0	0	0
2	Amb	Adams	reforest	1intensL	30	0	0	0
2	Amb	Adams	reforest	1intensL	31	0	0	0
2	Amb	Adams	reforest	2intensM	1	0	0	0
2	Amb	Adams	reforest	2intensM	2	0	0	0
2	Amb	Adams	reforest	2intensM	3	0	0	0
2	Amb	Adams	reforest	2intensM	4	0	0	0
2	Amb	Adams	reforest	2intensM	5	0	0	0
2	Amb	Adams	reforest	2intensM	6	0	0	0
2	Amb	Adams	reforest	2intensM	7	0	0	0
2	Amb	Adams	reforest	2intensM	8	0	0	0
2	Amb	Adams	reforest	2intensM	9	0	0	0
2	Amb	Adams	reforest	2intensM	10	0	0	0
2	Amb	Adams	reforest	2intensM	11	0	0	0
2	Amb	Adams	reforest	2intensM	12	0	0	0
2	Amb	Adams	reforest	2intensM	13	0	0	0
2	Amb	Adams	reforest	2intensM	14	0	0	0
2	Amb	Adams	reforest	2intensM	15	0	0	0
2	Amb	Adams	reforest	2intensM	16	0	0	0
2	Amb	Adams	reforest	2intensM	17	0	0	0
2	Amb	Adams	reforest	2intensM	18	0	0	0
2	Amb	Adams	reforest	2intensM	19	0	0	0
2	Amb	Adams	reforest	2intensM	20	0	0	0
2	Amb	Adams	reforest	2intensM	21	0	0	0
2	Amb	Adams	reforest	2intensM	22	0	0	0
2	Amb	Adams	reforest	2intensM	23	0	0	0
2	Amb	Adams	reforest	2intensM	24	0	0	0
2	Amb	Adams	reforest	2intensM	25	0	0	0
2	Amb	Adams	reforest	2intensM	26	0	0	0
2	Amb	Adams	reforest	2intensM	27	0	0	0
2	Amb	Adams	reforest	2intensM	28	0	0	0
2	Amb	Adams	reforest	2intensM	29	0	0	0
2	Amb	Adams	reforest	2intensM	30	0	0	0
2	Amb	Adams	reforest	2intensM	31	0	0	0
2	Amb	Adams	reforest	3intensH	1	0	0	0
2	Amb	Adams	reforest	3intensH	2	0	0	0
2	Amb	Adams	reforest	3intensH	3	0	0	0
2	Amb	Adams	reforest	3intensH	4	0	0	0
2	Amb	Adams	reforest	3intensH	5	0	0	0
2	Amb	Adams	reforest	3intensH	6	0	0	0
2	Amb	Adams	reforest	3intensH	7	0	0	0
2	Amb	Adams	reforest	3intensH	8	0	0	0
2	Amb	Adams	reforest	3intensH	9	0	0	0
2	Amb	Adams	reforest	3intensH	10	0	0	0
2	Amb	Adams	reforest	3intensH	11	0	0	0
2	Amb	Adams	reforest	3intensH	12	0	0	0
2	Amb	Adams	reforest	3intensH	13	0	0	0
2	Amb	Adams	reforest	3intensH	14	0	0	0
2	Amb	Adams	reforest	3intensH	15	0	0	0
2	Amb	Adams	reforest	3intensH	16	0	0	0
2	Amb	Adams	reforest	3intensH	17	0	0	0
2	Amb	Adams	reforest	3intensH	18	0	0	0
2	Amb	Adams	reforest	3intensH	19	0	0	0
2	Amb	Adams	reforest	3intensH	20	0	0	0
2	Amb	Adams	reforest	3intensH	21	0	0	0
2	Amb	Adams	reforest	3intensH	22	0	0	0
2	Amb	Adams	reforest	3intensH	23	0	0	0
2	Amb	Adams	reforest	3intensH	24	0	0	0
2	Amb	Adams	reforest	3intensH	25	0	0	0
2	Amb	Adams	reforest	3intensH	26	0	0	0
2	Amb	Adams	reforest	3intensH	27	0	0	0
2	Amb	Adams	reforest	3intensH	28	0	0	0
2	Amb	Adams	reforest	3intensH	29	0	0	0
2	Amb	Adams	reforest	3intensH	30	0	0	0
2	Amb	Adams	reforest	3intensH	31	0	0	0
3	Mod	Adams	reforest	1intensL	1	0	0	0
3	Mod	Adams	reforest	1intensL	2	0	0	0
3	Mod	Adams	reforest	1intensL	3	0	0	0
3	Mod	Adams	reforest	1intensL	4	0	0	0
3	Mod	Adams	reforest	1intensL	5	0	0	0
3	Mod	Adams	reforest	1intensL	6	0	0	0
3	Mod	Adams	reforest	1intensL	7	0	0	0
3	Mod	Adams	reforest	1intensL	8	0	0	0
3	Mod	Adams	reforest	1intensL	9	0	0	0
3	Mod	Adams	reforest	1intensL	10	0	0	0
3	Mod	Adams	reforest	1intensL	11	0	0	0
3	Mod	Adams	reforest	1intensL	12	0	0	0
3	Mod	Adams	reforest	1intensL	13	0	0	0
3	Mod	Adams	reforest	1intensL	14	0	0	0
3	Mod	Adams	reforest	1intensL	15	0	0	0
3	Mod	Adams	reforest	1intensL	16	0	0	0
3	Mod	Adams	reforest	1intensL	17	0	0	0
3	Mod	Adams	reforest	1intensL	18	0	0	0
3	Mod	Adams	reforest	1intensL	19	0	0	0
3	Mod	Adams	reforest	1intensL	20	0	0	0
3	Mod	Adams	reforest	1intensL	21	0	0	0
3	Mod	Adams	reforest	1intensL	22	0	0	0
3	Mod	Adams	reforest	1intensL	23	0	0	0
3	Mod	Adams	reforest	1intensL	24	0	0	0
3	Mod	Adams	reforest	1intensL	25	0	0	0
3	Mod	Adams	reforest	1intensL	26	0	0	0
3	Mod	Adams	reforest	1intensL	27	0	0	0
3	Mod	Adams	reforest	1intensL	28	0	0	0
3	Mod	Adams	reforest	1intensL	29	0	0	0
3	Mod	Adams	reforest	1intensL	30	0	0	0
3	Mod	Adams	reforest	1intensL	31	0	0	0
3	Mod	Adams	reforest	2intensM	1	0	0	0
3	Mod	Adams	reforest	2intensM	2	0	0	0
3	Mod	Adams	reforest	2intensM	3	0	0	0
3	Mod	Adams	reforest	2intensM	4	0	0	0
3	Mod	Adams	reforest	2intensM	5	0	0	0
3	Mod	Adams	reforest	2intensM	6	0	0	0
3	Mod	Adams	reforest	2intensM	7	0	0	0
3	Mod	Adams	reforest	2intensM	8	0	0	0
3	Mod	Adams	reforest	2intensM	9	0	0	0
3	Mod	Adams	reforest	2intensM	10	0	0	0
3	Mod	Adams	reforest	2intensM	11	0	0	0
3	Mod	Adams	reforest	2intensM	12	0	0	0
3	Mod	Adams	reforest	2intensM	13	0	0	0
3	Mod	Adams	reforest	2intensM	14	0	0	0
3	Mod	Adams	reforest	2intensM	15	0	0	0
3	Mod	Adams	reforest	2intensM	16	0	0	0
3	Mod	Adams	reforest	2intensM	17	0	0	0
3	Mod	Adams	reforest	2intensM	18	0	0	0
3	Mod	Adams	reforest	2intensM	19	0	0	0
3	Mod	Adams	reforest	2intensM	20	0	0	0
3	Mod	Adams	reforest	2intensM	21	0	0	0
3	Mod	Adams	reforest	2intensM	22	0	0	0
3	Mod	Adams	reforest	2intensM	23	0	0	0
3	Mod	Adams	reforest	2intensM	24	0	0	0
3	Mod	Adams	reforest	2intensM	25	0	0	0
3	Mod	Adams	reforest	2intensM	26	0	0	0
3	Mod	Adams	reforest	2intensM	27	0	0	0
3	Mod	Adams	reforest	2intensM	28	0	0	0
3	Mod	Adams	reforest	2intensM	29	0	0	0
3	Mod	Adams	reforest	2intensM	30	0	0	0
3	Mod	Adams	reforest	2intensM	31	0	0	0
3	Mod	Adams	reforest	3intensH	1	0	0	0
3	Mod	Adams	reforest	3intensH	2	0	0	0
3	Mod	Adams	reforest	3intensH	3	0	0	0
3	Mod	Adams	reforest	3intensH	4	0	0	0
3	Mod	Adams	reforest	3intensH	5	0	0	0
3	Mod	Adams	reforest	3intensH	6	0	0	0
3	Mod	Adams	reforest	3intensH	7	0	0	0
3	Mod	Adams	reforest	3intensH	8	0	0	0
3	Mod	Adams	reforest	3intensH	9	0	0	0
3	Mod	Adams	reforest	3intensH	10	0	0	0
3	Mod	Adams	reforest	3intensH	11	0	0	0
3	Mod	Adams	reforest	3intensH	12	0	0	0
3	Mod	Adams	reforest	3intensH	13	0	0	0
3	Mod	Adams	reforest	3intensH	14	0	0	0
3	Mod	Adams	reforest	3intensH	15	0	0	0
3	Mod	Adams	reforest	3intensH	16	0	0	0
3	Mod	Adams	reforest	3intensH	17	0	0	0
3	Mod	Adams	reforest	3intensH	18	0	0	0
3	Mod	Adams	reforest	3intensH	19	0	0	0
3	Mod	Adams	reforest	3intensH	20	0	0	0
3	Mod	Adams	reforest	3intensH	21	0	0	0
3	Mod	Adams	reforest	3intensH	22	0	0	0
3	Mod	Adams	reforest	3intensH	23	0	0	0
3	Mod	Adams	reforest	3intensH	24	0	0	0
3	Mod	Adams	reforest	3intensH	25	0	0	0
3	Mod	Adams	reforest	3intensH	26	0	0	0
3	Mod	Adams	reforest	3intensH	27	0	0	0
3	Mod	Adams	reforest	3intensH	28	0	0	0
3	Mod	Adams	reforest	3intensH	29	0	0	0
3	Mod	Adams	reforest	3intensH	30	0	0	0
3	Mod	Adams	reforest	3intensH	31	0	0	0
1	Lim	Adams	rref	1rref	1	0	0	0
1	Lim	Adams	rref	1rref	2	0	0	0
1	Lim	Adams	rref	1rref	3	0	0	0
1	Lim	Adams	rref	1rref	4	0	0	0
1	Lim	Adams	rref	1rref	5	0	0	0
1	Lim	Adams	rref	1rref	6	0	0	0
1	Lim	Adams	rref	1rref	7	0	0	0
1	Lim	Adams	rref	1rref	8	0	0	0
1	Lim	Adams	rref	1rref	9	0	0	0
1	Lim	Adams	rref	1rref	10	0	0	0
1	Lim	Adams	rref	1rref	11	0	0	0
1	Lim	Adams	rref	1rref	12	0	0	0
1	Lim	Adams	rref	1rref	13	0	0	0
1	Lim	Adams	rref	1rref	14	0	0	0
1	Lim	Adams	rref	1rref	15	0	0	0
1	Lim	Adams	rref	1rref	16	0	0	0
1	Lim	Adams	rref	1rref	17	0	0	0
1	Lim	Adams	rref	1rref	18	0	0	0
1	Lim	Adams	rref	1rref	19	0	0	0
1	Lim	Adams	rref	1rref	20	0	0	0
1	Lim	Adams	rref	1rref	21	0	0	0
1	Lim	Adams	rref	1rref	22	0	0	0
1	Lim	Adams	rref	1rref	23	0	0	0
1	Lim	Adams	rref	1rref	24	0	0	0
1	Lim	Adams	rref	1rref	25	0	0	0
1	Lim	Adams	rref	1rref	26	0	0	0
1	Lim	Adams	rref	1rref	27	0	0	0
1	Lim	Adams	rref	1rref	28	0	0	0
1	Lim	Adams	rref	1rref	29	0	0	0
1	Lim	Adams	rref	1rref	30	0	0	0
1	Lim	Adams	rref	1rref	31	0	0	0
2	Amb	Adams	rref	1rref	1	0	0	0
2	Amb	Adams	rref	1rref	2	0	0	0
2	Amb	Adams	rref	1rref	3	0	0	0
2	Amb	Adams	rref	1rref	4	0	0	0
2	Amb	Adams	rref	1rref	5	0	0	0
2	Amb	Adams	rref	1rref	6	0	0	0
2	Amb	Adams	rref	1rref	7	0	0	0
2	Amb	Adams	rref	1rref	8	0	0	0
2	Amb	Adams	rref	1rref	9	0	0	0
2	Amb	Adams	rref	1rref	10	0	0	0
2	Amb	Adams	rref	1rref	11	0	0	0
2	Amb	Adams	rref	1rref	12	0	0	0
2	Amb	Adams	rref	1rref	13	0	0	0
2	Amb	Adams	rref	1rref	14	0	0	0
2	Amb	Adams	rref	1rref	15	0	0	0
2	Amb	Adams	rref	1rref	16	0	0	0
2	Amb	Adams	rref	1rref	17	0	0	0
2	Amb	Adams	rref	1rref	18	0	0	0
2	Amb	Adams	rref	1rref	19	0	0	0
2	Amb	Adams	rref	1rref	20	0	0	0
2	Amb	Adams	rref	1rref	21	0	0	0
2	Amb	Adams	rref	1rref	22	0	0	0
2	Amb	Adams	rref	1rref	23	0	0	0
2	Amb	Adams	rref	1rref	24	0	0	0
2	Amb	Adams	rref	1rref	25	0	0	0
2	Amb	Adams	rref	1rref	26	0	0	0
2	Amb	Adams	rref	1rref	27	0	0	0
2	Amb	Adams	rref	1rref	28	0	0	0
2	Amb	Adams	rref	1rref	29	0	0	0
2	Amb	Adams	rref	1rref	30	0	0	0
2	Amb	Adams	rref	1rref	31	0	0	0
3	Mod	Adams	rref	1rref	1	0	0	0
3	Mod	Adams	rref	1rref	2	0	0	0
3	Mod	Adams	rref	1rref	3	0	0	0
3	Mod	Adams	rref	1rref	4	0	0	0
3	Mod	Adams	rref	1rref	5	0	0	0
3	Mod	Adams	rref	1rref	6	0	0	0
3	Mod	Adams	rref	1rref	7	0	0	0
3	Mod	Adams	rref	1rref	8	0	0	0
3	Mod	Adams	rref	1rref	9	0	0	0
3	Mod	Adams	rref	1rref	10	0	0	0
3	Mod	Adams	rref	1rref	11	0	0	0
3	Mod	Adams	rref	1rref	12	0	0	0
3	Mod	Adams	rref	1rref	13	0	0	0
3	Mod	Adams	rref	1rref	14	0	0	0
3	Mod	Adams	rref	1rref	15	0	0	0
3	Mod	Adams	rref	1rref	16	0	0	0
3	Mod	Adams	rref	1rref	17	0	0	0
3	Mod	Adams	rref	1rref	18	0	0	0
3	Mod	Adams	rref	1rref	19	0	0	0
3	Mod	Adams	rref	1rref	20	0	0	0
3	Mod	Adams	rref	1rref	21	0	0	0
3	Mod	Adams	rref	1rref	22	0	0	0
3	Mod	Adams	rref	1rref	23	0	0	0
3	Mod	Adams	rref	1rref	24	0	0	0
3	Mod	Adams	rref	1rref	25	0	0	0
3	Mod	Adams	rref	1rref	26	0	0	0
3	Mod	Adams	rref	1rref	27	0	0	0
3	Mod	Adams	rref	1rref	28	0	0	0
3	Mod	Adams	rref	1rref	29	0	0	0
3	Mod	Adams	rref	1rref	30	0	0	0
3	Mod	Adams	rref	1rref	31	0	0	0
1	Lim	Adams	sage	1s2ag	1	-2e-07	-1e-07	-2e-07
1	Lim	Adams	sage	1s2ag	2	-5e-07	-3e-07	-7e-07
1	Lim	Adams	sage	1s2ag	3	-1e-06	-6e-07	-1.4e-06
1	Lim	Adams	sage	1s2ag	4	-1.6e-06	-1e-06	-2.2e-06
1	Lim	Adams	sage	1s2ag	5	-2.4e-06	-1.4e-06	-3.3e-06
1	Lim	Adams	sage	1s2ag	6	-3.3e-06	-1.9e-06	-4.6e-06
1	Lim	Adams	sage	1s2ag	7	-4.3e-06	-2.6e-06	-6.1e-06
1	Lim	Adams	sage	1s2ag	8	-5.6e-06	-3.5e-06	-7.8e-06
1	Lim	Adams	sage	1s2ag	9	-6.9e-06	-4.2e-06	-9.7e-06
1	Lim	Adams	sage	1s2ag	10	-8.2e-06	-5.1e-06	-1.16e-05
1	Lim	Adams	sage	1s2ag	11	-9.8e-06	-6e-06	-1.37e-05
1	Lim	Adams	sage	1s2ag	12	-1.13e-05	-6.8e-06	-1.58e-05
1	Lim	Adams	sage	1s2ag	13	-1.28e-05	-7.7e-06	-1.81e-05
1	Lim	Adams	sage	1s2ag	14	-1.4e-05	-8.2e-06	-1.95e-05
1	Lim	Adams	sage	1s2ag	15	-1.53e-05	-9.3e-06	-2.21e-05
1	Lim	Adams	sage	1s2ag	16	-1.71e-05	-1.06e-05	-2.34e-05
1	Lim	Adams	sage	1s2ag	17	-1.8e-05	-1.06e-05	-2.56e-05
1	Lim	Adams	sage	1s2ag	18	-1.96e-05	-1.16e-05	-2.8e-05
1	Lim	Adams	sage	1s2ag	19	-2.06e-05	-1.2e-05	-2.92e-05
1	Lim	Adams	sage	1s2ag	20	-2.22e-05	-1.3e-05	-3.09e-05
1	Lim	Adams	sage	1s2ag	21	-2.34e-05	-1.44e-05	-3.33e-05
1	Lim	Adams	sage	1s2ag	22	-2.47e-05	-1.48e-05	-3.49e-05
1	Lim	Adams	sage	1s2ag	23	-2.59e-05	-1.49e-05	-3.67e-05
1	Lim	Adams	sage	1s2ag	24	-2.69e-05	-1.58e-05	-3.91e-05
1	Lim	Adams	sage	1s2ag	25	-2.84e-05	-1.74e-05	-3.97e-05
1	Lim	Adams	sage	1s2ag	26	-2.97e-05	-1.84e-05	-4.15e-05
1	Lim	Adams	sage	1s2ag	27	-3.13e-05	-1.82e-05	-4.37e-05
1	Lim	Adams	sage	1s2ag	28	-3.24e-05	-1.92e-05	-4.61e-05
1	Lim	Adams	sage	1s2ag	29	-3.34e-05	-1.93e-05	-4.74e-05
1	Lim	Adams	sage	1s2ag	30	-3.47e-05	-2.03e-05	-4.91e-05
1	Lim	Adams	sage	1s2ag	31	-3.63e-05	-2.09e-05	-5.2e-05
1	Lim	Adams	sage	2ag2s	1	0	0	0
1	Lim	Adams	sage	2ag2s	2	0	0	0
1	Lim	Adams	sage	2ag2s	3	0	0	0
1	Lim	Adams	sage	2ag2s	4	0	0	0
1	Lim	Adams	sage	2ag2s	5	0	0	0
1	Lim	Adams	sage	2ag2s	6	0	0	0
1	Lim	Adams	sage	2ag2s	7	0	0	0
1	Lim	Adams	sage	2ag2s	8	0	0	0
1	Lim	Adams	sage	2ag2s	9	0	0	0
1	Lim	Adams	sage	2ag2s	10	0	0	0
1	Lim	Adams	sage	2ag2s	11	0	0	0
1	Lim	Adams	sage	2ag2s	12	0	0	0
1	Lim	Adams	sage	2ag2s	13	0	0	0
1	Lim	Adams	sage	2ag2s	14	0	0	0
1	Lim	Adams	sage	2ag2s	15	0	0	0
1	Lim	Adams	sage	2ag2s	16	0	0	0
1	Lim	Adams	sage	2ag2s	17	0	0	0
1	Lim	Adams	sage	2ag2s	18	0	0	0
1	Lim	Adams	sage	2ag2s	19	0	0	0
1	Lim	Adams	sage	2ag2s	20	0	0	0
1	Lim	Adams	sage	2ag2s	21	0	0	0
1	Lim	Adams	sage	2ag2s	22	0	0	0
1	Lim	Adams	sage	2ag2s	23	0	0	0
1	Lim	Adams	sage	2ag2s	24	0	0	0
1	Lim	Adams	sage	2ag2s	25	0	0	0
1	Lim	Adams	sage	2ag2s	26	0	0	0
1	Lim	Adams	sage	2ag2s	27	0	0	0
1	Lim	Adams	sage	2ag2s	28	0	0	0
1	Lim	Adams	sage	2ag2s	29	0	0	0
1	Lim	Adams	sage	2ag2s	30	0	0	0
1	Lim	Adams	sage	2ag2s	31	0	0	0
2	Amb	Adams	sage	1s2ag	1	-1.9e-06	-1.2e-06	-2.5e-06
2	Amb	Adams	sage	1s2ag	2	-5.2e-06	-3.2e-06	-7e-06
2	Amb	Adams	sage	1s2ag	3	-1e-05	-6.6e-06	-1.37e-05
2	Amb	Adams	sage	1s2ag	4	-1.62e-05	-1.02e-05	-2.22e-05
2	Amb	Adams	sage	1s2ag	5	-2.44e-05	-1.45e-05	-3.33e-05
2	Amb	Adams	sage	1s2ag	6	-3.33e-05	-2.1e-05	-4.63e-05
2	Amb	Adams	sage	1s2ag	7	-4.35e-05	-2.76e-05	-6.11e-05
2	Amb	Adams	sage	1s2ag	8	-5.69e-05	-3.48e-05	-7.94e-05
2	Amb	Adams	sage	1s2ag	9	-6.89e-05	-4.12e-05	-9.76e-05
2	Amb	Adams	sage	1s2ag	10	-8.43e-05	-4.87e-05	-0.0001187
2	Amb	Adams	sage	1s2ag	11	-9.87e-05	-6.38e-05	-0.0001346
2	Amb	Adams	sage	1s2ag	12	-0.0001126	-6.7e-05	-0.0001548
2	Amb	Adams	sage	1s2ag	13	-0.0001275	-7.69e-05	-0.0001791
2	Amb	Adams	sage	1s2ag	14	-0.0001382	-8.65e-05	-0.0001944
2	Amb	Adams	sage	1s2ag	15	-0.0001561	-9.41e-05	-0.0002148
2	Amb	Adams	sage	1s2ag	16	-0.0001687	-0.0001007	-0.0002388
2	Amb	Adams	sage	1s2ag	17	-0.0001798	-0.0001051	-0.0002578
2	Amb	Adams	sage	1s2ag	18	-0.0001948	-0.0001162	-0.0002716
2	Amb	Adams	sage	1s2ag	19	-0.0002075	-0.0001204	-0.0002962
2	Amb	Adams	sage	1s2ag	20	-0.0002178	-0.0001292	-0.0003094
2	Amb	Adams	sage	1s2ag	21	-0.0002382	-0.0001453	-0.0003296
2	Amb	Adams	sage	1s2ag	22	-0.0002486	-0.0001528	-0.0003487
2	Amb	Adams	sage	1s2ag	23	-0.000262	-0.000156	-0.0003607
2	Amb	Adams	sage	1s2ag	24	-0.0002741	-0.0001602	-0.0003807
2	Amb	Adams	sage	1s2ag	25	-0.000286	-0.0001626	-0.0004073
2	Amb	Adams	sage	1s2ag	26	-0.0002964	-0.0001823	-0.0004216
2	Amb	Adams	sage	1s2ag	27	-0.0003071	-0.0001828	-0.0004382
2	Amb	Adams	sage	1s2ag	28	-0.0003201	-0.0001956	-0.0004559
2	Amb	Adams	sage	1s2ag	29	-0.0003363	-0.0001984	-0.0004763
2	Amb	Adams	sage	1s2ag	30	-0.0003475	-0.0002089	-0.0004943
2	Amb	Adams	sage	1s2ag	31	-0.0003542	-0.0002043	-0.0005011
2	Amb	Adams	sage	2ag2s	1	0	0	0
2	Amb	Adams	sage	2ag2s	2	0	0	0
2	Amb	Adams	sage	2ag2s	3	0	0	0
2	Amb	Adams	sage	2ag2s	4	0	0	0
2	Amb	Adams	sage	2ag2s	5	0	0	0
2	Amb	Adams	sage	2ag2s	6	0	0	0
2	Amb	Adams	sage	2ag2s	7	0	0	0
2	Amb	Adams	sage	2ag2s	8	0	0	0
2	Amb	Adams	sage	2ag2s	9	0	0	0
2	Amb	Adams	sage	2ag2s	10	0	0	0
2	Amb	Adams	sage	2ag2s	11	0	0	0
2	Amb	Adams	sage	2ag2s	12	0	0	0
2	Amb	Adams	sage	2ag2s	13	0	0	0
2	Amb	Adams	sage	2ag2s	14	0	0	0
2	Amb	Adams	sage	2ag2s	15	0	0	0
2	Amb	Adams	sage	2ag2s	16	0	0	0
2	Amb	Adams	sage	2ag2s	17	0	0	0
2	Amb	Adams	sage	2ag2s	18	0	0	0
2	Amb	Adams	sage	2ag2s	19	0	0	0
2	Amb	Adams	sage	2ag2s	20	0	0	0
2	Amb	Adams	sage	2ag2s	21	0	0	0
2	Amb	Adams	sage	2ag2s	22	0	0	0
2	Amb	Adams	sage	2ag2s	23	0	0	0
2	Amb	Adams	sage	2ag2s	24	0	0	0
2	Amb	Adams	sage	2ag2s	25	0	0	0
2	Amb	Adams	sage	2ag2s	26	0	0	0
2	Amb	Adams	sage	2ag2s	27	0	0	0
2	Amb	Adams	sage	2ag2s	28	0	0	0
2	Amb	Adams	sage	2ag2s	29	0	0	0
2	Amb	Adams	sage	2ag2s	30	0	0	0
2	Amb	Adams	sage	2ag2s	31	0	0	0
3	Mod	Adams	sage	1s2ag	1	-1.8e-06	-1.2e-06	-2.5e-06
3	Mod	Adams	sage	1s2ag	2	-3.3e-06	-2e-06	-4.6e-06
3	Mod	Adams	sage	1s2ag	3	-4.9e-06	-2.9e-06	-6.7e-06
3	Mod	Adams	sage	1s2ag	4	-6.4e-06	-3.9e-06	-8.8e-06
3	Mod	Adams	sage	1s2ag	5	-7.7e-06	-4.8e-06	-1.08e-05
3	Mod	Adams	sage	1s2ag	6	-9.3e-06	-5.7e-06	-1.3e-05
3	Mod	Adams	sage	1s2ag	7	-1.06e-05	-6.4e-06	-1.46e-05
3	Mod	Adams	sage	1s2ag	8	-1.2e-05	-7.4e-06	-1.73e-05
3	Mod	Adams	sage	1s2ag	9	-1.33e-05	-8.1e-06	-1.9e-05
3	Mod	Adams	sage	1s2ag	10	-1.68e-05	-1.02e-05	-2.33e-05
3	Mod	Adams	sage	1s2ag	11	-1.98e-05	-1.18e-05	-2.71e-05
3	Mod	Adams	sage	1s2ag	12	-2.23e-05	-1.33e-05	-3.05e-05
3	Mod	Adams	sage	1s2ag	13	-2.54e-05	-1.52e-05	-3.55e-05
3	Mod	Adams	sage	1s2ag	14	-2.8e-05	-1.66e-05	-3.94e-05
3	Mod	Adams	sage	1s2ag	15	-3.08e-05	-1.82e-05	-4.33e-05
3	Mod	Adams	sage	1s2ag	16	-3.34e-05	-2.06e-05	-4.63e-05
3	Mod	Adams	sage	1s2ag	17	-3.61e-05	-2.11e-05	-5.02e-05
3	Mod	Adams	sage	1s2ag	18	-4.01e-05	-2.26e-05	-5.61e-05
3	Mod	Adams	sage	1s2ag	19	-4.17e-05	-2.47e-05	-5.8e-05
3	Mod	Adams	sage	1s2ag	20	-4.45e-05	-2.59e-05	-6.17e-05
3	Mod	Adams	sage	1s2ag	21	-4.65e-05	-2.73e-05	-6.53e-05
3	Mod	Adams	sage	1s2ag	22	-4.93e-05	-3.09e-05	-6.96e-05
3	Mod	Adams	sage	1s2ag	23	-5.1e-05	-3.04e-05	-7.14e-05
3	Mod	Adams	sage	1s2ag	24	-5.38e-05	-3.2e-05	-7.6e-05
3	Mod	Adams	sage	1s2ag	25	-5.69e-05	-3.29e-05	-8.05e-05
3	Mod	Adams	sage	1s2ag	26	-5.94e-05	-3.59e-05	-8.42e-05
3	Mod	Adams	sage	1s2ag	27	-6.24e-05	-3.63e-05	-8.71e-05
3	Mod	Adams	sage	1s2ag	28	-6.4e-05	-3.83e-05	-8.87e-05
3	Mod	Adams	sage	1s2ag	29	-6.67e-05	-3.91e-05	-9.41e-05
3	Mod	Adams	sage	1s2ag	30	-6.86e-05	-4.22e-05	-9.91e-05
3	Mod	Adams	sage	1s2ag	31	-7.18e-05	-4.28e-05	-9.99e-05
3	Mod	Adams	sage	2ag2s	1	0	0	0
3	Mod	Adams	sage	2ag2s	2	0	0	0
3	Mod	Adams	sage	2ag2s	3	0	0	0
3	Mod	Adams	sage	2ag2s	4	0	0	0
3	Mod	Adams	sage	2ag2s	5	0	0	0
3	Mod	Adams	sage	2ag2s	6	0	0	0
3	Mod	Adams	sage	2ag2s	7	0	0	0
3	Mod	Adams	sage	2ag2s	8	0	0	0
3	Mod	Adams	sage	2ag2s	9	0	0	0
3	Mod	Adams	sage	2ag2s	10	0	0	0
3	Mod	Adams	sage	2ag2s	11	0	0	0
3	Mod	Adams	sage	2ag2s	12	0	0	0
3	Mod	Adams	sage	2ag2s	13	0	0	0
3	Mod	Adams	sage	2ag2s	14	0	0	0
3	Mod	Adams	sage	2ag2s	15	0	0	0
3	Mod	Adams	sage	2ag2s	16	0	0	0
3	Mod	Adams	sage	2ag2s	17	0	0	0
3	Mod	Adams	sage	2ag2s	18	0	0	0
3	Mod	Adams	sage	2ag2s	19	0	0	0
3	Mod	Adams	sage	2ag2s	20	0	0	0
3	Mod	Adams	sage	2ag2s	21	0	0	0
3	Mod	Adams	sage	2ag2s	22	0	0	0
3	Mod	Adams	sage	2ag2s	23	0	0	0
3	Mod	Adams	sage	2ag2s	24	0	0	0
3	Mod	Adams	sage	2ag2s	25	0	0	0
3	Mod	Adams	sage	2ag2s	26	0	0	0
3	Mod	Adams	sage	2ag2s	27	0	0	0
3	Mod	Adams	sage	2ag2s	28	0	0	0
3	Mod	Adams	sage	2ag2s	29	0	0	0
3	Mod	Adams	sage	2ag2s	30	0	0	0
3	Mod	Adams	sage	2ag2s	31	0	0	0
1	Lim	Adams	tide	1tide	1	0	0	0
1	Lim	Adams	tide	1tide	2	0	0	0
1	Lim	Adams	tide	1tide	3	0	0	0
1	Lim	Adams	tide	1tide	4	0	0	0
1	Lim	Adams	tide	1tide	5	0	0	0
1	Lim	Adams	tide	1tide	6	0	0	0
1	Lim	Adams	tide	1tide	7	0	0	0
1	Lim	Adams	tide	1tide	8	0	0	0
1	Lim	Adams	tide	1tide	9	0	0	0
1	Lim	Adams	tide	1tide	10	0	0	0
1	Lim	Adams	tide	1tide	11	0	0	0
1	Lim	Adams	tide	1tide	12	0	0	0
1	Lim	Adams	tide	1tide	13	0	0	0
1	Lim	Adams	tide	1tide	14	0	0	0
1	Lim	Adams	tide	1tide	15	0	0	0
1	Lim	Adams	tide	1tide	16	0	0	0
1	Lim	Adams	tide	1tide	17	0	0	0
1	Lim	Adams	tide	1tide	18	0	0	0
1	Lim	Adams	tide	1tide	19	0	0	0
1	Lim	Adams	tide	1tide	20	0	0	0
1	Lim	Adams	tide	1tide	21	0	0	0
1	Lim	Adams	tide	1tide	22	0	0	0
1	Lim	Adams	tide	1tide	23	0	0	0
1	Lim	Adams	tide	1tide	24	0	0	0
1	Lim	Adams	tide	1tide	25	0	0	0
1	Lim	Adams	tide	1tide	26	0	0	0
1	Lim	Adams	tide	1tide	27	0	0	0
1	Lim	Adams	tide	1tide	28	0	0	0
1	Lim	Adams	tide	1tide	29	0	0	0
1	Lim	Adams	tide	1tide	30	0	0	0
1	Lim	Adams	tide	1tide	31	0	0	0
2	Amb	Adams	tide	1tide	1	0	0	0
2	Amb	Adams	tide	1tide	2	0	0	0
2	Amb	Adams	tide	1tide	3	0	0	0
2	Amb	Adams	tide	1tide	4	0	0	0
2	Amb	Adams	tide	1tide	5	0	0	0
2	Amb	Adams	tide	1tide	6	0	0	0
2	Amb	Adams	tide	1tide	7	0	0	0
2	Amb	Adams	tide	1tide	8	0	0	0
2	Amb	Adams	tide	1tide	9	0	0	0
2	Amb	Adams	tide	1tide	10	0	0	0
2	Amb	Adams	tide	1tide	11	0	0	0
2	Amb	Adams	tide	1tide	12	0	0	0
2	Amb	Adams	tide	1tide	13	0	0	0
2	Amb	Adams	tide	1tide	14	0	0	0
2	Amb	Adams	tide	1tide	15	0	0	0
2	Amb	Adams	tide	1tide	16	0	0	0
2	Amb	Adams	tide	1tide	17	0	0	0
2	Amb	Adams	tide	1tide	18	0	0	0
2	Amb	Adams	tide	1tide	19	0	0	0
2	Amb	Adams	tide	1tide	20	0	0	0
2	Amb	Adams	tide	1tide	21	0	0	0
2	Amb	Adams	tide	1tide	22	0	0	0
2	Amb	Adams	tide	1tide	23	0	0	0
2	Amb	Adams	tide	1tide	24	0	0	0
2	Amb	Adams	tide	1tide	25	0	0	0
2	Amb	Adams	tide	1tide	26	0	0	0
2	Amb	Adams	tide	1tide	27	0	0	0
2	Amb	Adams	tide	1tide	28	0	0	0
2	Amb	Adams	tide	1tide	29	0	0	0
2	Amb	Adams	tide	1tide	30	0	0	0
2	Amb	Adams	tide	1tide	31	0	0	0
3	Mod	Adams	tide	1tide	1	0	0	0
3	Mod	Adams	tide	1tide	2	0	0	0
3	Mod	Adams	tide	1tide	3	0	0	0
3	Mod	Adams	tide	1tide	4	0	0	0
3	Mod	Adams	tide	1tide	5	0	0	0
3	Mod	Adams	tide	1tide	6	0	0	0
3	Mod	Adams	tide	1tide	7	0	0	0
3	Mod	Adams	tide	1tide	8	0	0	0
3	Mod	Adams	tide	1tide	9	0	0	0
3	Mod	Adams	tide	1tide	10	0	0	0
3	Mod	Adams	tide	1tide	11	0	0	0
3	Mod	Adams	tide	1tide	12	0	0	0
3	Mod	Adams	tide	1tide	13	0	0	0
3	Mod	Adams	tide	1tide	14	0	0	0
3	Mod	Adams	tide	1tide	15	0	0	0
3	Mod	Adams	tide	1tide	16	0	0	0
3	Mod	Adams	tide	1tide	17	0	0	0
3	Mod	Adams	tide	1tide	18	0	0	0
3	Mod	Adams	tide	1tide	19	0	0	0
3	Mod	Adams	tide	1tide	20	0	0	0
3	Mod	Adams	tide	1tide	21	0	0	0
3	Mod	Adams	tide	1tide	22	0	0	0
3	Mod	Adams	tide	1tide	23	0	0	0
3	Mod	Adams	tide	1tide	24	0	0	0
3	Mod	Adams	tide	1tide	25	0	0	0
3	Mod	Adams	tide	1tide	26	0	0	0
3	Mod	Adams	tide	1tide	27	0	0	0
3	Mod	Adams	tide	1tide	28	0	0	0
3	Mod	Adams	tide	1tide	29	0	0	0
3	Mod	Adams	tide	1tide	30	0	0	0
3	Mod	Adams	tide	1tide	31	0	0	0
1	Lim	Asotin	ACF	1f2rur	1	0	0	0
1	Lim	Asotin	ACF	1f2rur	2	0	0	0
1	Lim	Asotin	ACF	1f2rur	3	0	0	0
1	Lim	Asotin	ACF	1f2rur	4	0	0	0
1	Lim	Asotin	ACF	1f2rur	5	0	0	0
1	Lim	Asotin	ACF	1f2rur	6	0	0	0
1	Lim	Asotin	ACF	1f2rur	7	0	0	0
1	Lim	Asotin	ACF	1f2rur	8	0	0	0
1	Lim	Asotin	ACF	1f2rur	9	0	0	0
1	Lim	Asotin	ACF	1f2rur	10	0	0	0
1	Lim	Asotin	ACF	1f2rur	11	0	0	0
1	Lim	Asotin	ACF	1f2rur	12	0	0	0
1	Lim	Asotin	ACF	1f2rur	13	0	0	0
1	Lim	Asotin	ACF	1f2rur	14	0	0	0
1	Lim	Asotin	ACF	1f2rur	15	0	0	0
1	Lim	Asotin	ACF	1f2rur	16	0	0	0
1	Lim	Asotin	ACF	1f2rur	17	0	0	0
1	Lim	Asotin	ACF	1f2rur	18	0	0	0
1	Lim	Asotin	ACF	1f2rur	19	0	0	0
1	Lim	Asotin	ACF	1f2rur	20	0	0	0
1	Lim	Asotin	ACF	1f2rur	21	0	0	0
1	Lim	Asotin	ACF	1f2rur	22	0	0	0
1	Lim	Asotin	ACF	1f2rur	23	0	0	0
1	Lim	Asotin	ACF	1f2rur	24	0	0	0
1	Lim	Asotin	ACF	1f2rur	25	0	0	0
1	Lim	Asotin	ACF	1f2rur	26	0	0	0
1	Lim	Asotin	ACF	1f2rur	27	0	0	0
1	Lim	Asotin	ACF	1f2rur	28	0	0	0
1	Lim	Asotin	ACF	1f2rur	29	0	0	0
1	Lim	Asotin	ACF	1f2rur	30	0	0	0
1	Lim	Asotin	ACF	1f2rur	31	0	0	0
1	Lim	Asotin	ACF	2f2urb	1	-1.33e-05	-3.4e-06	-2.42e-05
1	Lim	Asotin	ACF	2f2urb	2	-2.6e-05	-6.7e-06	-4.73e-05
1	Lim	Asotin	ACF	2f2urb	3	-4.23e-05	-1.11e-05	-7.13e-05
1	Lim	Asotin	ACF	2f2urb	4	-5.23e-05	-1.2e-05	-9.77e-05
1	Lim	Asotin	ACF	2f2urb	5	-6.72e-05	-1.85e-05	-0.000119
1	Lim	Asotin	ACF	2f2urb	6	-8.21e-05	-2.56e-05	-0.0001464
1	Lim	Asotin	ACF	2f2urb	7	-9.29e-05	-2.69e-05	-0.0001737
1	Lim	Asotin	ACF	2f2urb	8	-0.0001064	-2.76e-05	-0.0001921
1	Lim	Asotin	ACF	2f2urb	9	-0.000122	-3.41e-05	-0.0002158
1	Lim	Asotin	ACF	2f2urb	10	-0.00013	-3.57e-05	-0.0002457
1	Lim	Asotin	ACF	2f2urb	11	-0.000138	-3.78e-05	-0.0002498
1	Lim	Asotin	ACF	2f2urb	12	-0.0001373	-3.9e-05	-0.0002529
1	Lim	Asotin	ACF	2f2urb	13	-0.0001376	-4.32e-05	-0.0002453
1	Lim	Asotin	ACF	2f2urb	14	-0.000143	-4.59e-05	-0.0002429
1	Lim	Asotin	ACF	2f2urb	15	-0.0001393	-4.33e-05	-0.0002596
1	Lim	Asotin	ACF	2f2urb	16	-0.0001385	-4.11e-05	-0.0002505
1	Lim	Asotin	ACF	2f2urb	17	-0.0001397	-4.15e-05	-0.0002485
1	Lim	Asotin	ACF	2f2urb	18	-0.0001409	-4.81e-05	-0.000243
1	Lim	Asotin	ACF	2f2urb	19	-0.0001451	-4.76e-05	-0.0002551
1	Lim	Asotin	ACF	2f2urb	20	-0.0001381	-4.46e-05	-0.0002526
1	Lim	Asotin	ACF	2f2urb	21	-0.0001401	-4.59e-05	-0.000258
1	Lim	Asotin	ACF	2f2urb	22	-0.0001412	-4.57e-05	-0.0002505
1	Lim	Asotin	ACF	2f2urb	23	-0.0001469	-5.04e-05	-0.0002588
1	Lim	Asotin	ACF	2f2urb	24	-0.0001476	-4.5e-05	-0.0002599
1	Lim	Asotin	ACF	2f2urb	25	-0.000144	-5.03e-05	-0.0002538
1	Lim	Asotin	ACF	2f2urb	26	-0.000147	-5.02e-05	-0.0002538
1	Lim	Asotin	ACF	2f2urb	27	-0.0001462	-4.69e-05	-0.0002572
1	Lim	Asotin	ACF	2f2urb	28	-0.0001466	-5.5e-05	-0.0002558
1	Lim	Asotin	ACF	2f2urb	29	-0.0001499	-5.05e-05	-0.0002623
1	Lim	Asotin	ACF	2f2urb	30	-0.0001465	-4.61e-05	-0.0002691
1	Lim	Asotin	ACF	2f2urb	31	-0.0001485	-4.61e-05	-0.0002567
2	Amb	Asotin	ACF	1f2rur	1	0	0	0
2	Amb	Asotin	ACF	1f2rur	2	0	0	0
2	Amb	Asotin	ACF	1f2rur	3	0	0	0
2	Amb	Asotin	ACF	1f2rur	4	0	0	0
2	Amb	Asotin	ACF	1f2rur	5	0	0	0
2	Amb	Asotin	ACF	1f2rur	6	0	0	0
2	Amb	Asotin	ACF	1f2rur	7	0	0	0
2	Amb	Asotin	ACF	1f2rur	8	0	0	0
2	Amb	Asotin	ACF	1f2rur	9	0	0	0
2	Amb	Asotin	ACF	1f2rur	10	0	0	0
2	Amb	Asotin	ACF	1f2rur	11	0	0	0
2	Amb	Asotin	ACF	1f2rur	12	0	0	0
2	Amb	Asotin	ACF	1f2rur	13	0	0	0
2	Amb	Asotin	ACF	1f2rur	14	0	0	0
2	Amb	Asotin	ACF	1f2rur	15	0	0	0
2	Amb	Asotin	ACF	1f2rur	16	0	0	0
2	Amb	Asotin	ACF	1f2rur	17	0	0	0
2	Amb	Asotin	ACF	1f2rur	18	0	0	0
2	Amb	Asotin	ACF	1f2rur	19	0	0	0
2	Amb	Asotin	ACF	1f2rur	20	0	0	0
2	Amb	Asotin	ACF	1f2rur	21	0	0	0
2	Amb	Asotin	ACF	1f2rur	22	0	0	0
2	Amb	Asotin	ACF	1f2rur	23	0	0	0
2	Amb	Asotin	ACF	1f2rur	24	0	0	0
2	Amb	Asotin	ACF	1f2rur	25	0	0	0
2	Amb	Asotin	ACF	1f2rur	26	0	0	0
2	Amb	Asotin	ACF	1f2rur	27	0	0	0
2	Amb	Asotin	ACF	1f2rur	28	0	0	0
2	Amb	Asotin	ACF	1f2rur	29	0	0	0
2	Amb	Asotin	ACF	1f2rur	30	0	0	0
2	Amb	Asotin	ACF	1f2rur	31	0	0	0
2	Amb	Asotin	ACF	2f2urb	1	-0.0001328	-3.72e-05	-0.0002364
2	Amb	Asotin	ACF	2f2urb	2	-0.0002606	-6.58e-05	-0.0004848
2	Amb	Asotin	ACF	2f2urb	3	-0.0003907	-0.0001144	-0.0007112
2	Amb	Asotin	ACF	2f2urb	4	-0.0005391	-0.0001489	-0.0009482
2	Amb	Asotin	ACF	2f2urb	5	-0.0006931	-0.000203	-0.0012099
2	Amb	Asotin	ACF	2f2urb	6	-0.0007939	-0.000204	-0.0014346
2	Amb	Asotin	ACF	2f2urb	7	-0.0009462	-0.000238	-0.0016397
2	Amb	Asotin	ACF	2f2urb	8	-0.0011179	-0.0003521	-0.0019503
2	Amb	Asotin	ACF	2f2urb	9	-0.0012293	-0.0003064	-0.0021113
2	Amb	Asotin	ACF	2f2urb	10	-0.001353	-0.0004348	-0.0025429
2	Amb	Asotin	ACF	2f2urb	11	-0.0013616	-0.0003693	-0.0025026
2	Amb	Asotin	ACF	2f2urb	12	-0.0013512	-0.0003869	-0.0024474
2	Amb	Asotin	ACF	2f2urb	13	-0.001363	-0.0004228	-0.0025131
2	Amb	Asotin	ACF	2f2urb	14	-0.0014173	-0.0004086	-0.0024599
2	Amb	Asotin	ACF	2f2urb	15	-0.0014323	-0.0004177	-0.0024853
2	Amb	Asotin	ACF	2f2urb	16	-0.0013997	-0.0004373	-0.0025305
2	Amb	Asotin	ACF	2f2urb	17	-0.0014168	-0.0004595	-0.0025286
2	Amb	Asotin	ACF	2f2urb	18	-0.0014261	-0.0004194	-0.0025539
2	Amb	Asotin	ACF	2f2urb	19	-0.0014563	-0.0004231	-0.0025298
2	Amb	Asotin	ACF	2f2urb	20	-0.0014254	-0.0004218	-0.0024221
2	Amb	Asotin	ACF	2f2urb	21	-0.0014154	-0.0004624	-0.0025405
2	Amb	Asotin	ACF	2f2urb	22	-0.0014017	-0.0004643	-0.0025792
2	Amb	Asotin	ACF	2f2urb	23	-0.0014374	-0.0004899	-0.0025958
2	Amb	Asotin	ACF	2f2urb	24	-0.001474	-0.0004879	-0.0025524
2	Amb	Asotin	ACF	2f2urb	25	-0.0014454	-0.0005047	-0.0025373
2	Amb	Asotin	ACF	2f2urb	26	-0.0014755	-0.0004579	-0.0025601
2	Amb	Asotin	ACF	2f2urb	27	-0.0014404	-0.0004612	-0.0025298
2	Amb	Asotin	ACF	2f2urb	28	-0.0014496	-0.0004705	-0.00257
2	Amb	Asotin	ACF	2f2urb	29	-0.0014867	-0.000457	-0.0024757
2	Amb	Asotin	ACF	2f2urb	30	-0.0014573	-0.0004595	-0.0025521
2	Amb	Asotin	ACF	2f2urb	31	-0.001502	-0.0005099	-0.0026413
3	Mod	Asotin	ACF	1f2rur	1	0	0	0
3	Mod	Asotin	ACF	1f2rur	2	0	0	0
3	Mod	Asotin	ACF	1f2rur	3	0	0	0
3	Mod	Asotin	ACF	1f2rur	4	0	0	0
3	Mod	Asotin	ACF	1f2rur	5	0	0	0
3	Mod	Asotin	ACF	1f2rur	6	0	0	0
3	Mod	Asotin	ACF	1f2rur	7	0	0	0
3	Mod	Asotin	ACF	1f2rur	8	0	0	0
3	Mod	Asotin	ACF	1f2rur	9	0	0	0
3	Mod	Asotin	ACF	1f2rur	10	0	0	0
3	Mod	Asotin	ACF	1f2rur	11	0	0	0
3	Mod	Asotin	ACF	1f2rur	12	0	0	0
3	Mod	Asotin	ACF	1f2rur	13	0	0	0
3	Mod	Asotin	ACF	1f2rur	14	0	0	0
3	Mod	Asotin	ACF	1f2rur	15	0	0	0
3	Mod	Asotin	ACF	1f2rur	16	0	0	0
3	Mod	Asotin	ACF	1f2rur	17	0	0	0
3	Mod	Asotin	ACF	1f2rur	18	0	0	0
3	Mod	Asotin	ACF	1f2rur	19	0	0	0
3	Mod	Asotin	ACF	1f2rur	20	0	0	0
3	Mod	Asotin	ACF	1f2rur	21	0	0	0
3	Mod	Asotin	ACF	1f2rur	22	0	0	0
3	Mod	Asotin	ACF	1f2rur	23	0	0	0
3	Mod	Asotin	ACF	1f2rur	24	0	0	0
3	Mod	Asotin	ACF	1f2rur	25	0	0	0
3	Mod	Asotin	ACF	1f2rur	26	0	0	0
3	Mod	Asotin	ACF	1f2rur	27	0	0	0
3	Mod	Asotin	ACF	1f2rur	28	0	0	0
3	Mod	Asotin	ACF	1f2rur	29	0	0	0
3	Mod	Asotin	ACF	1f2rur	30	0	0	0
3	Mod	Asotin	ACF	1f2rur	31	0	0	0
3	Mod	Asotin	ACF	2f2urb	1	-6.62e-05	-1.63e-05	-0.0001177
3	Mod	Asotin	ACF	2f2urb	2	-0.0001319	-3.68e-05	-0.0002381
3	Mod	Asotin	ACF	2f2urb	3	-0.000199	-6.2e-05	-0.0003663
3	Mod	Asotin	ACF	2f2urb	4	-0.0002564	-6.39e-05	-0.0004853
3	Mod	Asotin	ACF	2f2urb	5	-0.0003356	-9.16e-05	-0.000602
3	Mod	Asotin	ACF	2f2urb	6	-0.000404	-0.0001135	-0.0007258
3	Mod	Asotin	ACF	2f2urb	7	-0.0004808	-0.0001264	-0.0008183
3	Mod	Asotin	ACF	2f2urb	8	-0.0005421	-0.0001339	-0.0009682
3	Mod	Asotin	ACF	2f2urb	9	-0.000631	-0.0001576	-0.0010953
3	Mod	Asotin	ACF	2f2urb	10	-0.0006653	-0.0001969	-0.001244
3	Mod	Asotin	ACF	2f2urb	11	-0.0006982	-0.000197	-0.0012266
3	Mod	Asotin	ACF	2f2urb	12	-0.0006903	-0.0002017	-0.001244
3	Mod	Asotin	ACF	2f2urb	13	-0.0006953	-0.000209	-0.0012311
3	Mod	Asotin	ACF	2f2urb	14	-0.0007027	-0.0001881	-0.001231
3	Mod	Asotin	ACF	2f2urb	15	-0.0007032	-0.0002187	-0.0012425
3	Mod	Asotin	ACF	2f2urb	16	-0.0006915	-0.0002105	-0.0012381
3	Mod	Asotin	ACF	2f2urb	17	-0.000691	-0.000207	-0.0012534
3	Mod	Asotin	ACF	2f2urb	18	-0.0007177	-0.0002172	-0.0012297
3	Mod	Asotin	ACF	2f2urb	19	-0.0007033	-0.0002276	-0.0012784
3	Mod	Asotin	ACF	2f2urb	20	-0.0006985	-0.0002011	-0.0012618
3	Mod	Asotin	ACF	2f2urb	21	-0.0007125	-0.0002015	-0.0012485
3	Mod	Asotin	ACF	2f2urb	22	-0.0007143	-0.0002239	-0.0012511
3	Mod	Asotin	ACF	2f2urb	23	-0.0007408	-0.0002199	-0.0012593
3	Mod	Asotin	ACF	2f2urb	24	-0.0007794	-0.0002324	-0.0013005
3	Mod	Asotin	ACF	2f2urb	25	-0.0007301	-0.0002437	-0.0012786
3	Mod	Asotin	ACF	2f2urb	26	-0.0007346	-0.0002386	-0.0012632
3	Mod	Asotin	ACF	2f2urb	27	-0.0007389	-0.0002207	-0.0012991
3	Mod	Asotin	ACF	2f2urb	28	-0.0007518	-0.0002575	-0.001292
3	Mod	Asotin	ACF	2f2urb	29	-0.0007435	-0.0002644	-0.001248
3	Mod	Asotin	ACF	2f2urb	30	-0.0007493	-0.000208	-0.0012649
3	Mod	Asotin	ACF	2f2urb	31	-0.0007318	-0.0002694	-0.001293
1	Lim	Asotin	ag	1cc	1	-4.1e-06	-2.5e-06	-5.9e-06
1	Lim	Asotin	ag	1cc	2	-8.3e-06	-4.9e-06	-1.18e-05
1	Lim	Asotin	ag	1cc	3	-1.25e-05	-7.6e-06	-1.74e-05
1	Lim	Asotin	ag	1cc	4	-1.64e-05	-1.04e-05	-2.32e-05
1	Lim	Asotin	ag	1cc	5	-2.04e-05	-1.24e-05	-2.9e-05
1	Lim	Asotin	ag	1cc	6	-2.49e-05	-1.51e-05	-3.48e-05
1	Lim	Asotin	ag	1cc	7	-2.93e-05	-1.72e-05	-4.1e-05
1	Lim	Asotin	ag	1cc	8	-3.27e-05	-1.97e-05	-4.63e-05
1	Lim	Asotin	ag	1cc	9	-3.76e-05	-2.22e-05	-5.23e-05
1	Lim	Asotin	ag	1cc	10	-4.11e-05	-2.46e-05	-5.78e-05
1	Lim	Asotin	ag	1cc	11	-4.09e-05	-2.49e-05	-5.78e-05
1	Lim	Asotin	ag	1cc	12	-4.13e-05	-2.43e-05	-5.88e-05
1	Lim	Asotin	ag	1cc	13	-4.15e-05	-2.49e-05	-5.82e-05
1	Lim	Asotin	ag	1cc	14	-4.09e-05	-2.49e-05	-5.75e-05
1	Lim	Asotin	ag	1cc	15	-4.1e-05	-2.41e-05	-5.81e-05
1	Lim	Asotin	ag	1cc	16	-4.1e-05	-2.42e-05	-5.8e-05
1	Lim	Asotin	ag	1cc	17	-4.13e-05	-2.56e-05	-5.79e-05
1	Lim	Asotin	ag	1cc	18	-4.13e-05	-2.51e-05	-5.78e-05
1	Lim	Asotin	ag	1cc	19	-4.15e-05	-2.43e-05	-5.85e-05
1	Lim	Asotin	ag	1cc	20	-4.18e-05	-2.49e-05	-5.86e-05
1	Lim	Asotin	ag	1cc	21	-4.02e-05	-2.41e-05	-5.8e-05
1	Lim	Asotin	ag	1cc	22	-4.19e-05	-2.5e-05	-5.91e-05
1	Lim	Asotin	ag	1cc	23	-4.15e-05	-2.44e-05	-5.83e-05
1	Lim	Asotin	ag	1cc	24	-4.07e-05	-2.48e-05	-5.77e-05
1	Lim	Asotin	ag	1cc	25	-4.06e-05	-2.4e-05	-5.75e-05
1	Lim	Asotin	ag	1cc	26	-4.09e-05	-2.5e-05	-5.79e-05
1	Lim	Asotin	ag	1cc	27	-4.1e-05	-2.49e-05	-5.77e-05
1	Lim	Asotin	ag	1cc	28	-4.15e-05	-2.5e-05	-5.71e-05
1	Lim	Asotin	ag	1cc	29	-4.05e-05	-2.33e-05	-5.76e-05
1	Lim	Asotin	ag	1cc	30	-4.11e-05	-2.58e-05	-5.78e-05
1	Lim	Asotin	ag	1cc	31	-4.09e-05	-2.44e-05	-5.73e-05
1	Lim	Asotin	ag	2nt	1	-0.0001437	-6.41e-05	-0.0002289
1	Lim	Asotin	ag	2nt	2	-0.0002958	-0.0001303	-0.0004638
1	Lim	Asotin	ag	2nt	3	-0.0004313	-0.0001875	-0.0006933
1	Lim	Asotin	ag	2nt	4	-0.0005852	-0.0002587	-0.0009118
1	Lim	Asotin	ag	2nt	5	-0.0007607	-0.0003094	-0.0011635
1	Lim	Asotin	ag	2nt	6	-0.0008902	-0.000389	-0.0013862
1	Lim	Asotin	ag	2nt	7	-0.0010364	-0.000466	-0.0016178
1	Lim	Asotin	ag	2nt	8	-0.0011709	-0.0005016	-0.0018275
1	Lim	Asotin	ag	2nt	9	-0.0013471	-0.0005818	-0.0020943
1	Lim	Asotin	ag	2nt	10	-0.0014446	-0.0006289	-0.0023049
1	Lim	Asotin	ag	2nt	11	-0.0014325	-0.0006201	-0.0023055
1	Lim	Asotin	ag	2nt	12	-0.0014469	-0.0006309	-0.0022999
1	Lim	Asotin	ag	2nt	13	-0.0014354	-0.0006397	-0.002297
1	Lim	Asotin	ag	2nt	14	-0.001464	-0.0006375	-0.002311
1	Lim	Asotin	ag	2nt	15	-0.0014907	-0.0006413	-0.0023136
1	Lim	Asotin	ag	2nt	16	-0.0014565	-0.0006223	-0.0022646
1	Lim	Asotin	ag	2nt	17	-0.0014606	-0.0006185	-0.0023054
1	Lim	Asotin	ag	2nt	18	-0.0014352	-0.0006246	-0.0022906
1	Lim	Asotin	ag	2nt	19	-0.0014557	-0.000616	-0.0022988
1	Lim	Asotin	ag	2nt	20	-0.0014426	-0.0006223	-0.0022957
1	Lim	Asotin	ag	2nt	21	-0.0014357	-0.0006396	-0.0022789
1	Lim	Asotin	ag	2nt	22	-0.0015026	-0.0006623	-0.0023013
1	Lim	Asotin	ag	2nt	23	-0.0014477	-0.0006371	-0.0022846
1	Lim	Asotin	ag	2nt	24	-0.0014922	-0.0006678	-0.0023159
1	Lim	Asotin	ag	2nt	25	-0.0015122	-0.0006457	-0.0023046
1	Lim	Asotin	ag	2nt	26	-0.0014249	-0.0006161	-0.0023018
1	Lim	Asotin	ag	2nt	27	-0.0014546	-0.0006509	-0.0023133
1	Lim	Asotin	ag	2nt	28	-0.0014205	-0.0006217	-0.0022942
1	Lim	Asotin	ag	2nt	29	-0.0015032	-0.0006606	-0.0022988
1	Lim	Asotin	ag	2nt	30	-0.0014909	-0.0006461	-0.0022695
1	Lim	Asotin	ag	2nt	31	-0.0015077	-0.0006399	-0.0022935
1	Lim	Asotin	ag	3nm	1	-2.62e-05	-1.6e-05	-3.57e-05
1	Lim	Asotin	ag	3nm	2	-5.08e-05	-3.12e-05	-7.13e-05
1	Lim	Asotin	ag	3nm	3	-7.65e-05	-4.58e-05	-0.0001066
1	Lim	Asotin	ag	3nm	4	-0.000104	-6.17e-05	-0.0001421
1	Lim	Asotin	ag	3nm	5	-0.0001284	-7.69e-05	-0.000177
1	Lim	Asotin	ag	3nm	6	-0.0001524	-9.26e-05	-0.0002111
1	Lim	Asotin	ag	3nm	7	-0.0001779	-0.0001114	-0.0002484
1	Lim	Asotin	ag	3nm	8	-0.0002042	-0.0001257	-0.0002842
1	Lim	Asotin	ag	3nm	9	-0.0002269	-0.0001408	-0.0003198
1	Lim	Asotin	ag	3nm	10	-0.0002541	-0.0001569	-0.0003569
1	Lim	Asotin	ag	3nm	11	-0.0002606	-0.0001561	-0.0003556
1	Lim	Asotin	ag	3nm	12	-0.0002579	-0.0001554	-0.000356
1	Lim	Asotin	ag	3nm	13	-0.0002537	-0.0001537	-0.0003555
1	Lim	Asotin	ag	3nm	14	-0.0002521	-0.0001572	-0.0003569
1	Lim	Asotin	ag	3nm	15	-0.0002556	-0.0001577	-0.0003572
1	Lim	Asotin	ag	3nm	16	-0.0002562	-0.000156	-0.0003539
1	Lim	Asotin	ag	3nm	17	-0.0002551	-0.0001562	-0.000355
1	Lim	Asotin	ag	3nm	18	-0.0002528	-0.0001575	-0.0003567
1	Lim	Asotin	ag	3nm	19	-0.000255	-0.0001534	-0.0003544
1	Lim	Asotin	ag	3nm	20	-0.0002579	-0.0001556	-0.000357
1	Lim	Asotin	ag	3nm	21	-0.0002551	-0.0001547	-0.0003514
1	Lim	Asotin	ag	3nm	22	-0.0002523	-0.0001561	-0.0003554
1	Lim	Asotin	ag	3nm	23	-0.0002509	-0.0001567	-0.0003553
1	Lim	Asotin	ag	3nm	24	-0.0002595	-0.0001593	-0.000356
1	Lim	Asotin	ag	3nm	25	-0.0002536	-0.0001519	-0.0003572
1	Lim	Asotin	ag	3nm	26	-0.0002581	-0.0001524	-0.0003552
1	Lim	Asotin	ag	3nm	27	-0.0002568	-0.0001546	-0.0003551
1	Lim	Asotin	ag	3nm	28	-0.0002596	-0.0001557	-0.0003551
1	Lim	Asotin	ag	3nm	29	-0.0002559	-0.0001546	-0.0003544
1	Lim	Asotin	ag	3nm	30	-0.0002565	-0.0001577	-0.0003563
1	Lim	Asotin	ag	3nm	31	-0.0002565	-0.0001557	-0.000358
2	Amb	Asotin	ag	1cc	1	-0.0003104	-0.0001774	-0.000441
2	Amb	Asotin	ag	1cc	2	-0.0006204	-0.0003811	-0.0008737
2	Amb	Asotin	ag	1cc	3	-0.0009259	-0.000557	-0.0013126
2	Amb	Asotin	ag	1cc	4	-0.0012192	-0.0007352	-0.0017066
2	Amb	Asotin	ag	1cc	5	-0.0015483	-0.0009376	-0.0021401
2	Amb	Asotin	ag	1cc	6	-0.0018576	-0.0011496	-0.0025773
2	Amb	Asotin	ag	1cc	7	-0.0021852	-0.0012251	-0.0030166
2	Amb	Asotin	ag	1cc	8	-0.0024456	-0.0014503	-0.0034654
2	Amb	Asotin	ag	1cc	9	-0.0027622	-0.0017401	-0.0038418
2	Amb	Asotin	ag	1cc	10	-0.0030539	-0.0018315	-0.0043652
2	Amb	Asotin	ag	1cc	11	-0.003398	-0.0019266	-0.0047508
2	Amb	Asotin	ag	1cc	12	-0.0036822	-0.0022549	-0.0051911
2	Amb	Asotin	ag	1cc	13	-0.0040107	-0.0023268	-0.0055828
2	Amb	Asotin	ag	1cc	14	-0.0042533	-0.002465	-0.0060932
2	Amb	Asotin	ag	1cc	15	-0.0045739	-0.002742	-0.0064698
2	Amb	Asotin	ag	1cc	16	-0.0049214	-0.002899	-0.0067886
2	Amb	Asotin	ag	1cc	17	-0.0052616	-0.0030232	-0.0073872
2	Amb	Asotin	ag	1cc	18	-0.0054971	-0.0030313	-0.0078114
2	Amb	Asotin	ag	1cc	19	-0.005772	-0.0036015	-0.0081235
2	Amb	Asotin	ag	1cc	20	-0.0061917	-0.0037185	-0.0086967
2	Amb	Asotin	ag	1cc	21	-0.0064773	-0.0040306	-0.0090511
2	Amb	Asotin	ag	1cc	22	-0.0067508	-0.0040145	-0.0097359
2	Amb	Asotin	ag	1cc	23	-0.0071266	-0.0044549	-0.0100201
2	Amb	Asotin	ag	1cc	24	-0.0073295	-0.0043572	-0.0103131
2	Amb	Asotin	ag	1cc	25	-0.0077435	-0.0045162	-0.010916
2	Amb	Asotin	ag	1cc	26	-0.0080008	-0.0047855	-0.0112685
2	Amb	Asotin	ag	1cc	27	-0.0082803	-0.0049037	-0.0115688
2	Amb	Asotin	ag	1cc	28	-0.0086813	-0.0052938	-0.0121543
2	Amb	Asotin	ag	1cc	29	-0.0089196	-0.0054511	-0.0124177
2	Amb	Asotin	ag	1cc	30	-0.0093038	-0.0056124	-0.0130804
2	Amb	Asotin	ag	1cc	31	-0.009522	-0.005893	-0.0133774
2	Amb	Asotin	ag	2nt	1	5.28e-05	8.58e-05	2.36e-05
2	Amb	Asotin	ag	2nt	2	0.0001086	0.0001695	4.74e-05
2	Amb	Asotin	ag	2nt	3	0.0001637	0.0002596	6.98e-05
2	Amb	Asotin	ag	2nt	4	0.000225	0.0003448	9.37e-05
2	Amb	Asotin	ag	2nt	5	0.0002731	0.0004299	0.000122
2	Amb	Asotin	ag	2nt	6	0.0003233	0.0005128	0.0001432
2	Amb	Asotin	ag	2nt	7	0.0003751	0.0006001	0.0001638
2	Amb	Asotin	ag	2nt	8	0.0004435	0.0006863	0.0001928
2	Amb	Asotin	ag	2nt	9	0.0005053	0.0007776	0.0002201
2	Amb	Asotin	ag	2nt	10	0.0005477	0.0008623	0.0002344
2	Amb	Asotin	ag	2nt	11	0.0006015	0.0009364	0.0002639
2	Amb	Asotin	ag	2nt	12	0.0006414	0.001031	0.0002836
2	Amb	Asotin	ag	2nt	13	0.0006924	0.0011041	0.0003087
2	Amb	Asotin	ag	2nt	14	0.0007642	0.0012005	0.0003414
2	Amb	Asotin	ag	2nt	15	0.000811	0.0012961	0.0003571
[truncated: 63,287 more rows]

## Sheet: S4-S8_dictionary
FileName	Description
Supplemental Table S4.csv	Evaluated results of Monte Carlo runs on each scenario in each year, statewide.
Supplemental Table S5.csv	Evaluated results of Monte Carlo runs on each pathway activity per scenario in each year, statewide.
Supplemental Table S6.csv	Evaluated results of Monte Carlo runs on each scenario in each year, per county.
Supplemental Table S7.csv	Evaluated results of Monte Carlo runs on each pathway subactivity per scenario in each year, per county.
Supplemental Table S8.csv	Evaluated results of Monte Carlo runs on each pathway activity per scenario in each year, per county.
Columns	Description	Values or Units
Scenario	Numeric identifier for each scenario.	2=Ambitious, 3=Moderate, 1=Limited
ScenName	Name of each scenario	Amb=Ambitious, Mod=Moderate, Lim=Limited
County	Name of each county (39 counties total)	Adams, Asotin, Benton, Chelan, Clallam, Clark, Columbia, Cowlitz, Douglas, Ferry, Franklin, Garfield, Grant, Grays Harbor, Island, Jefferson, King, Kitsap, Kittitas, Klickitat, Lewis, Lincoln, Mason, Okanogan, Pacific, Pend Oreille, Pierce, San Juan, Skagit, Skamania, Snohomish, Spokane, Stevens, Thurston, Wahkiakum, Walla Walla, Whatcom, Whitman, Yakima
Activity	NCS pathway, where some are a combination of subactivities (defined below)	ACF=avoided conversion of forest, ag=agricultural activities, grass=restoration and avoided conversion of grasslands, ifm=improved forest management (aka extended timber harvest rotations), reforest=replanting after wildfires, rref=riparian reforestation, sage=restoration and avoided conversion of sagebrush-steppe, tide=tidal wetland restoration
Subactivity	Specific NCS activity that is equivalent to or combines with other subactivities to be a NCS pathway	(see Lines 19-37 below)
Year	Consecutive years that the pathway is implemented per each scenario	Range: 1-31 (e.g. representing hypothetical years 2020-2050)
Median	Median of Monte Carlo results in MMT CO2e per year.	Units: MMT CO2e yr-1
CI_High	Confidence Interval at 95th percentile value of Monte Carlo results.	Units: MMT CO2e yr-1
CI_Low	Confidence Interval at 5th percentile value of Monte Carlo results.	Units: MMT CO2e yr-1
Subactivity (Line 13 above)	Activity (Line 12 above)	Description
1f2rur	ACF	avoided conversion of forests to rural development
2f2urb	ACF	avoided conversion of forests to urban development
1cc	ag	cover crop
2nt	ag	no-till
3nm	ag	nutrient management
1grass	grass	restoration and avoided conversion of grassland
1feder	ifm	extended timber harvest on federal lands
2other	ifm	extended timber harvest on other (e.g. nature preserves, local government) lands
3priva	ifm	extended timber harvest on private lands (industrial and non-industrial)
4state	ifm	extended timber harvest on state lands
5prseq	ifm	extended timber harvest on private lands, with additional sequestration by avoiding clearcutting
1intensL	reforest	replanting forest after low intensity wildfire
2intensM	reforest	replanting forest after medium intensity wildfire
3intensH	reforest	replanting forest after high intensity wildfire
1rref	rref	riparian reforestation
1s2ag	sage	restoration of sagebrush-steppe from agricultural uses
2ag2s	sage	avoided conversation of sagebrush-steppe to agricultural uses
1tide	tide	tidal wetland restoration
