# Supplementary material for: Leveraging the potential of nature to meet net zero greenhouse gas emissions in Washington State
Source: PeerJ. 2021 Jul 21;9:e11802. doi: 10.7717/peerj.11802 (PMC8308619; doi:10.7717/peerj.11802)
Supplement: Supplemental Information 9 — A data dictionary is included as a tab in this file. [file peerj-09-11802-s009.xlsx]

## Sheet: S9
		Emissions Reductions (MMT CO2e in year 30 of the model)																								Emissions reductions per county area in year 30 of model (MMT C02e / ha)
		Amb								Mod								Lim								Amb								Mod								Lim
County	County_Hectares	ACF	ag	grass	ifm	reforest	rref	sage	tide	ACF	ag	grass	ifm	reforest	rref	sage	tide	ACF	ag	grass	ifm	reforest	rref	sage	tide	ACF	ag	grass	ifm	reforest	rref	sage	tide	ACF	ag	grass	ifm	reforest	rref	sage	tide	ACF	ag	grass	ifm	reforest	rref	sage	tide
Adams	499868	0	-2.77023	-0.0187681	0	0	0	-0.0048626	0	0	-0.568665	-0.0130684	0	0	0	-0.0009868	0	0	-0.0445791	-0.0018768	0	0	0	-0.0004855	0	0	-5.54192e-06	-3.75461e-08	0	0	0	-9.72777e-09	0	0	-1.13763e-06	-2.61437e-08	0	0	0	-1.97412e-09	0	0	-8.91817e-08	-3.75459e-09	0	0	0	-9.71256e-10	0
Asotin	165941	-0.0359897	-0.155332	-0.0072634	-0.30536	0	-0.0353642	-0.0270453	0	-0.0180992	-0.194919	-0.0050595	-0.121227	0	-0.0118895	-0.0054866	0	-0.003588	-0.0448768	-0.0007274	-0.268373	0	-0.0015336	-0.002711	0	-2.16883e-07	-9.36068e-07	-4.37711e-08	-1.84018e-06	0	-2.13114e-07	-1.62982e-07	0	-1.0907e-07	-1.17463e-06	-3.04898e-08	-7.30545e-07	0	-7.16491e-08	-3.30636e-08	0	-2.16222e-08	-2.70439e-07	-4.38349e-09	-1.61728e-06	0	-9.24186e-09	-1.63372e-08	0
Benton	455838	0	-1.93	-0.0021342	0	0	0	-0.174026	0	0	-1.61969	-0.0014855	0	0	0	-0.0351962	0	0	-0.22479	-0.0002132	0	0	0	-0.0174347	0	0	-4.23396e-06	-4.68192e-09	0	0	0	-3.81772e-07	0	0	-3.5532e-06	-3.25883e-09	0	0	0	-7.7212e-08	0	0	-4.93136e-07	-4.6771e-10	0	0	0	-3.82476e-08	0
Chelan	775365	-0.256748	-0.126968	-4.08e-05	0	-0.382193	-0.0054403	-0.0879889	0	-0.128732	-0.163072	-2.81e-05	0	-0.195526	-0.001828	-0.0177295	0	-0.0257281	-0.0259106	-4.8e-06	0	-0.117779	-0.0002357	-0.0087846	0	-3.31132e-07	-1.63752e-07	-5.26204e-11	0	-4.9292e-07	-7.01643e-09	-1.13481e-07	0	-1.66027e-07	-2.10316e-07	-3.6241e-11	0	-2.52173e-07	-2.3576e-09	-2.2866e-08	0	-3.31819e-08	-3.34173e-08	-6.19063e-12	0	-1.51902e-07	-3.03986e-10	-1.13296e-08	0
Clallam	456978	-0.537299	-0.0231692	-5.62e-05	-8.18024	0	-0.204074	0	-2.09e-05	-0.269346	-0.0109265	-3.98e-05	-5.15204	0	-0.0685564	0	-1.35e-05	-0.0537431	-0.0077721	-5.2e-06	-6.99381	0	-0.0088339	0	-6.7e-06	-1.17577e-06	-5.07009e-08	-1.22982e-10	-1.79007e-05	0	-4.46574e-07	0	-4.57353e-11	-5.89406e-07	-2.39104e-08	-8.70939e-11	-1.12742e-05	0	-1.50021e-07	0	-2.95419e-11	-1.17605e-07	-1.70076e-08	-1.13791e-11	-1.53045e-05	0	-1.93311e-08	0	-1.46615e-11
Clark	169981	-1.84304	-0.0726217	-0.0004519	-3.00063	0	-0.0603304	0	-0.0564168	-0.920706	-0.0357252	-0.0003145	-1.70215	0	-0.0202634	0	-0.0362313	-0.184044	-0.0103315	-4.58e-05	-3.45721	0	-0.0026117	0	-0.018098	-1.08426e-05	-4.27234e-07	-2.65853e-09	-1.76527e-05	0	-3.54924e-07	0	-3.31901e-07	-5.41652e-06	-2.10172e-07	-1.85021e-09	-1.00138e-05	0	-1.1921e-07	0	-2.13149e-07	-1.08273e-06	-6.07803e-08	-2.69442e-10	-2.03388e-05	0	-1.53647e-08	0	-1.06471e-07
Columbia	226262	-0.0119733	-0.409617	-0.0020736	-1.03112	-0.650753	-0.140164	-0.0097032	0	-0.0060029	-0.264791	-0.0014449	-0.37626	-0.315763	-0.0471016	-0.0019582	0	-0.0012067	-0.0528087	-0.0002068	-0.904225	-0.192707	-0.0060687	-0.0009658	0	-5.2918e-08	-1.81037e-06	-9.16462e-09	-4.55718e-06	-2.87611e-06	-6.19479e-07	-4.28849e-08	0	-2.65308e-08	-1.17029e-06	-6.38597e-09	-1.66294e-06	-1.39556e-06	-2.08173e-07	-8.65459e-09	0	-5.33321e-09	-2.33397e-07	-9.13987e-10	-3.99637e-06	-8.51698e-07	-2.68216e-08	-4.26851e-09	0
Cowlitz	302045	-1.28578	-0.0526094	-4.6e-05	-9.42541	0	-0.138392	0	-0.0904686	-0.644282	-0.0119014	-3.26e-05	-6.4592	0	-0.0465378	0	-0.0580414	-0.128504	-0.0067331	-5e-06	-5.36683	0	-0.0059982	0	-0.0290358	-4.25692e-06	-1.74178e-07	-1.52295e-10	-3.12053e-05	0	-4.58182e-07	0	-2.99521e-07	-2.13307e-06	-3.94028e-08	-1.07931e-10	-2.13849e-05	0	-1.54076e-07	0	-1.92162e-07	-4.25449e-07	-2.22917e-08	-1.65538e-11	-1.77683e-05	0	-1.98587e-08	0	-9.61308e-08
Douglas	478811	-0.0450987	-1.34153	-0.0125678	-0.0722186	0	0	-0.224697	0	-0.0224769	-0.486203	-0.0087354	-0.0182057	0	0	-0.0455513	0	-0.0044957	-0.0892743	-0.0012573	-0.0605862	0	0	-0.0225449	0	-9.41889e-08	-2.80179e-06	-2.62479e-08	-1.50829e-07	0	0	-4.6928e-07	0	-4.69431e-08	-1.01544e-06	-1.82439e-08	-3.80227e-08	0	0	-9.51341e-08	0	-9.38929e-09	-1.8645e-07	-2.62588e-09	-1.26535e-07	0	0	-4.70851e-08	0
Ferry	584638	-0.185324	-0.0396128	-1.78e-05	0	-0.0397952	0	-0.0111915	0	-0.0931993	-0.0026746	-1.22e-05	0	-0.0191734	0	-0.0022691	0	-0.0186818	-0.0068225	-2.3e-06	0	-0.0113132	0	-0.0011172	0	-3.1699e-07	-6.77561e-08	-3.04462e-11	0	-6.80681e-08	0	-1.91426e-08	0	-1.59414e-07	-4.57479e-09	-2.08676e-11	0	-3.27953e-08	0	-3.8812e-09	0	-3.19545e-08	-1.16696e-08	-3.93406e-12	0	-1.93508e-08	0	-1.91092e-09	0
Franklin	327582	0	-1.94249	-0.002991	0	0	0	-0.0861717	0	0	-0.970923	-0.0020813	0	0	0	-0.017393	0	0	-0.297504	-0.0002992	0	0	0	-0.008603	0	0	-5.92978e-06	-9.13054e-09	0	0	0	-2.63054e-07	0	0	-2.96391e-06	-6.35352e-09	0	0	0	-5.30951e-08	0	0	-9.08183e-07	-9.13359e-10	0	0	0	-2.62621e-08	0
Garfield	186013	0	-0.417379	-0.0038609	-0.476033	-0.566689	-0.0492677	0	0	0	-0.514262	-0.002688	-0.239443	-0.292461	-0.0165641	0	0	0	-0.104541	-0.0003863	-0.415996	-0.180472	-0.002133	0	0	0	-2.24382e-06	-2.07561e-08	-2.55914e-06	-3.0465e-06	-2.64861e-07	0	0	0	-2.76466e-06	-1.44506e-08	-1.28724e-06	-1.57226e-06	-8.9048e-08	0	0	0	-5.62011e-07	-2.07674e-09	-2.23638e-06	-9.7021e-07	-1.14669e-08	0	0
Grant	722996	0	-3.82785	-0.0022931	0	0	0	-0.141812	0	0	-2.62044	-0.0015964	0	0	0	-0.0286842	0	0	-0.28532	-0.0002293	0	0	0	-0.0141821	0	0	-5.29443e-06	-3.17166e-09	0	0	0	-1.96146e-07	0	0	-3.62441e-06	-2.20804e-09	0	0	0	-3.96741e-08	0	0	-3.94636e-07	-3.17153e-10	0	0	0	-1.96157e-08	0
Grays Harbor	499661	-0.499899	-0.0469037	-6.35e-05	-14.5886	0	-0.0579362	0	-0.0695011	-0.249116	-0.124719	-4.39e-05	-9.54573	0	-0.0194694	0	-0.0446444	-0.0500045	-0.0239847	-5.2e-06	-12.8627	0	-0.0025109	0	-0.0223284	-1.00048e-06	-9.38711e-08	-1.27086e-10	-2.9197e-05	0	-1.15951e-07	0	-1.39097e-07	-4.9857e-07	-2.49607e-07	-8.78596e-11	-1.91044e-05	0	-3.89652e-08	0	-8.93494e-08	-1.00077e-07	-4.8002e-08	-1.04071e-11	-2.57429e-05	0	-5.02521e-09	0	-4.46871e-08
Island	54726.5	-0.962654	-0.0215963	-3.33e-05	-0.366497	0	-0.0002572	0	-0.014708	-0.480028	-0.0077112	-2.38e-05	-0.234932	0	-8.63e-05	0	-0.0094437	-0.0960404	-0.0071625	-2.7e-06	-0.344484	0	-1.11e-05	0	-0.0047304	-1.75903e-05	-3.94622e-07	-6.0848e-10	-6.69689e-06	0	-4.69974e-09	0	-2.68755e-07	-8.77141e-06	-1.40904e-07	-4.3489e-10	-4.29285e-06	0	-1.57693e-09	0	-1.72562e-07	-1.75492e-06	-1.30878e-07	-4.93363e-11	-6.29464e-06	0	-2.02827e-10	0	-8.64371e-08
Jefferson	471041	-0.828536	-0.008393	-5e-06	-4.86536	0	-0.102217	0	-0.011531	-0.413036	-0.0029988	-3e-06	-3.10374	0	-0.0343491	0	-0.0108431	-0.0825116	-0.0069263	0	-3.96762	0	-0.0044282	0	-0.0059728	-1.75894e-06	-1.7818e-08	-1.06148e-11	-1.03289e-05	0	-2.17003e-07	0	-2.44798e-08	-8.76857e-07	-6.36632e-09	-6.36887e-12	-6.58911e-06	0	-7.29216e-08	0	-2.30194e-08	-1.75168e-07	-1.47042e-08	0	-8.42308e-06	0	-9.40087e-09	0	-1.268e-08
King	567311	-2.93762	-0.0605494	-0.0001495	-3.15009	0	-0.0748029	0	-0.0001186	-1.46641	-0.0333742	-0.0001039	-2.97502	0	-0.0251561	0	-7.64e-05	-0.293278	-0.0101441	-1.53e-05	-0.0035996	0	-0.0032422	0	-3.78e-05	-5.17814e-06	-1.0673e-07	-2.63524e-10	-5.55267e-06	0	-1.31855e-07	0	-2.09056e-10	-2.58484e-06	-5.88287e-08	-1.83145e-10	-5.24406e-06	0	-4.43427e-08	0	-1.3467e-10	-5.16961e-07	-1.7881e-08	-2.69693e-11	-6.34502e-09	0	-5.71503e-09	0	-6.66301e-11
Kitsap	104610	-2.134	-0.0088352	-2.5e-06	-1.44946	0	-0.0118365	0	0	-1.06535	-0.0062599	-1.8e-06	-0.967394	0	-0.0041177	0	0	-0.213367	-0.0071559	0	-1.03037	0	-0.0005306	0	0	-2.03997e-05	-8.44587e-08	-2.38984e-11	-1.38559e-05	0	-1.13149e-07	0	0	-1.01841e-05	-5.98405e-08	-1.72068e-11	-9.24765e-06	0	-3.93625e-08	0	0	-2.03965e-06	-6.84057e-08	0	-9.84966e-06	0	-5.07219e-09	0	0
Kittitas	604271	-0.529925	-0.304638	-0.0004146	-2.5901	-0.0004823	-0.0655351	-0.141067	0	-0.263776	-0.129509	-0.0002888	-0.73524	-0.0004213	-0.0220108	-0.0283736	0	-0.0531451	-0.0157294	-4.09e-05	-2.21695	-0.0002598	-0.002839	-0.0141027	0	-8.76967e-07	-5.04141e-07	-6.86116e-10	-4.28633e-06	-7.98152e-10	-1.08453e-07	-2.33449e-07	0	-4.3652e-07	-2.14324e-07	-4.77932e-10	-1.21674e-06	-6.97204e-10	-3.64254e-08	-4.69551e-08	0	-8.79492e-08	-2.60304e-08	-6.76849e-11	-3.6688e-06	-4.2994e-10	-4.69823e-09	-2.33384e-08	0
Klickitat	493212	-0.590379	-0.494869	-0.0227494	-9.517	0	-0.0198746	-0.0605814	0	-0.294818	-0.328634	-0.0158401	-2.52103	0	-0.0066763	-0.0123045	0	-0.0594067	-0.0649832	-0.0022761	-7.08346	0	-0.0008607	-0.0060518	0	-1.19701e-06	-1.00336e-06	-4.6125e-08	-1.9296e-05	0	-4.02963e-08	-1.2283e-07	0	-5.97752e-07	-6.66313e-07	-3.21162e-08	-5.11146e-06	0	-1.35364e-08	-2.49477e-08	0	-1.20449e-07	-1.31755e-07	-4.61485e-09	-1.43619e-05	0	-1.74509e-09	-1.22702e-08	0
Lewis	630973	-2.03206	-0.120061	-0.0010563	-15.5798	0	-0.0588178	0	0	-1.01616	-0.0834708	-0.0007364	-11.2467	0	-0.019757	0	0	-0.203278	-0.0175114	-0.000106	-7.53069	0	-0.002548	0	0	-3.22051e-06	-1.90278e-07	-1.67408e-09	-2.46917e-05	0	-9.32176e-08	0	0	-1.61047e-06	-1.32289e-07	-1.16709e-09	-1.78243e-05	0	-3.13119e-08	0	0	-3.22165e-07	-2.7753e-08	-1.67994e-10	-1.1935e-05	0	-4.03821e-09	0	0
Lincoln	605902	-0.241176	-2.21406	-0.0075169	-0.309566	0	0	-0.117359	0	-0.119768	-0.985018	-0.0052298	-0.078649	0	0	-0.0236724	0	-0.0240473	-0.178906	-0.0007504	-0.228642	0	0	-0.0117019	0	-3.98044e-07	-3.65416e-06	-1.24061e-08	-5.10917e-07	0	0	-1.93692e-07	0	-1.97668e-07	-1.6257e-06	-8.63143e-09	-1.29805e-07	0	0	-3.90697e-08	0	-3.96884e-08	-2.95273e-07	-1.23848e-09	-3.77358e-07	0	0	-1.93132e-08	0
Mason	252084	-1.11107	-0.0101648	-5.1e-06	-5.29195	0	-0.305245	0	-0.0718819	-0.559402	-0.0026493	-3.8e-06	-3.49798	0	-0.102613	0	-0.0537734	-0.111809	-0.0067571	0	-3.47968	0	-0.0132222	0	-0.0268622	-4.40755e-06	-4.03231e-08	-2.02314e-11	-2.09928e-05	0	-1.21089e-06	0	-2.85151e-07	-2.21911e-06	-1.05096e-08	-1.50744e-11	-1.38763e-05	0	-4.07059e-07	0	-2.13316e-07	-4.4354e-07	-2.6805e-08	0	-1.38037e-05	0	-5.24516e-08	0	-1.06561e-07
Okanogan	1.37658e+06	-0.254658	-0.318394	-0.0002785	0	-0.11653	-0.0027	-0.667913	0	-0.128338	-0.192787	-0.0001933	0	-0.0554982	-0.0009068	-0.134219	0	-0.0255212	-0.0306888	-2.8e-05	0	-0.0342189	-0.0001168	-0.0667644	0	-1.84993e-07	-2.31294e-07	-2.02313e-10	0	-8.46516e-08	-1.96138e-09	-4.85198e-07	0	-9.32293e-08	-1.40048e-07	-1.4042e-10	0	-4.0316e-08	-6.58734e-10	-9.75017e-08	0	-1.85396e-08	-2.22935e-08	-2.03403e-11	0	-2.48579e-08	-8.4848e-11	-4.85002e-08	0
Pacific	248717	-0.279271	-0.0383176	-5.2e-06	-12.412	0	-0.0021416	0	-0.0762273	-0.139942	-0.0062454	-4.2e-06	-8.3321	0	-0.0007197	0	-0.0488677	-0.0280293	-0.0069175	0	-9.15953	0	-9.26e-05	0	-0.0244368	-1.12285e-06	-1.54061e-07	-2.09073e-11	-4.9904e-05	0	-8.6106e-09	0	-3.06482e-07	-5.62657e-07	-2.51105e-08	-1.68867e-11	-3.35003e-05	0	-2.89365e-09	0	-1.96479e-07	-1.12696e-07	-2.78128e-08	0	-3.68271e-05	0	-3.72311e-10	0	-9.82515e-08
Pend Oreille	369125	-0.281088	-0.0435053	-2.6e-06	-5.18563	0	-0.0028271	0	0	-0.140313	-0.0033702	-2.1e-06	-1.92007	0	-0.0009501	0	0	-0.0280475	-0.0066047	0	-2.36038	0	-0.0001226	0	0	-7.61497e-07	-1.1786e-07	-7.04368e-12	-1.40484e-05	0	-7.65892e-09	0	0	-3.80123e-07	-9.13023e-09	-5.68912e-12	-5.20166e-06	0	-2.57392e-09	0	0	-7.59837e-08	-1.78928e-08	0	-6.39451e-06	0	-3.32136e-10	0	0
Pierce	438563	-3.07727	-0.0416498	-0.000246	-7.158	0	-0.0736139	0	-0.0282319	-1.53671	-0.0162024	-0.000171	-4.76611	0	-0.0247401	0	-0.0247142	-0.306194	-0.0079603	-2.55e-05	-6.00457	0	-0.0031884	0	-0.0124885	-7.01672e-06	-9.49688e-08	-5.60923e-10	-1.63215e-05	0	-1.67853e-07	0	-6.43736e-08	-3.50396e-06	-3.69443e-08	-3.8991e-10	-1.08676e-05	0	-5.64117e-08	0	-5.63527e-08	-6.98175e-07	-1.81509e-08	-5.81444e-11	-1.36915e-05	0	-7.27011e-09	0	-2.8476e-08
San Juan	44884.5	-0.507897	-0.013483	-3.12e-05	-0.112064	0	0	0	0	-0.25434	-0.0059123	-2.21e-05	-0.0674777	0	0	0	0	-0.0509027	-0.0073313	-2.6e-06	-0.165512	0	0	0	0	-1.13156e-05	-3.00393e-07	-6.95117e-10	-2.49673e-06	0	0	0	0	-5.66653e-06	-1.31722e-07	-4.92375e-10	-1.50336e-06	0	0	0	0	-1.13408e-06	-1.63337e-07	-5.79264e-11	-3.68751e-06	0	0	0	0
Skagit	454051	-0.468929	-0.406839	-0.0005581	-4.3245	0	-0.292487	0	-0.134406	-0.234185	-0.340399	-0.0003888	-2.75534	0	-0.0983278	0	-0.0862836	-0.0466909	-0.0414004	-5.61e-05	-2.35266	0	-0.0126754	0	-0.0432173	-1.03277e-06	-8.9602e-07	-1.22916e-09	-9.52425e-06	0	-6.44173e-07	0	-2.96016e-07	-5.15768e-07	-7.49693e-07	-8.56291e-10	-6.06834e-06	0	-2.16557e-07	0	-1.90031e-07	-1.02832e-07	-9.118e-08	-1.23554e-10	-5.18148e-06	0	-2.79162e-08	0	-9.51816e-08
Skamania	436128	-0.262983	-0.0047973	0	-3.00952	0	-0.0225772	-0.0015013	-0.0020039	-0.13135	-0.003091	0	-1.97918	0	-0.0075862	-0.0003036	-0.0012854	-0.0263438	-0.0069616	0	-2.65031	0	-0.0009779	-0.0001493	-0.000644	-6.02994e-07	-1.09997e-08	0	-6.90055e-06	0	-5.17673e-08	-3.44233e-09	-4.59475e-09	-3.01172e-07	-7.08736e-09	0	-4.53806e-06	0	-1.73944e-08	-6.96125e-10	-2.9473e-09	-6.04038e-08	-1.59623e-08	0	-6.07691e-06	0	-2.24223e-09	-3.4233e-10	-1.47663e-09
Snohomish	545892	-2.86039	-0.109491	-0.0003283	-4.4575	0	-0.254707	0	-0.338163	-1.43249	-0.157825	-0.0002284	-2.60193	0	-0.085615	0	-0.217104	-0.28634	-0.0279009	-3.31e-05	-3.5152	0	-0.0110362	0	-0.108363	-5.23984e-06	-2.00572e-07	-6.01401e-10	-8.16554e-06	0	-4.66588e-07	0	-6.19468e-07	-2.62412e-06	-2.89113e-07	-4.18398e-10	-4.76638e-06	0	-1.56835e-07	0	-3.97705e-07	-5.24536e-07	-5.11106e-08	-6.06347e-11	-6.43937e-06	0	-2.02168e-08	0	-1.98506e-07
Spokane	461200	-1.02379	-1.09122	-0.0009436	-2.17931	0	-8.59e-05	-0.0072066	0	-0.512068	-0.784	-0.0006566	-0.641533	0	-2.89e-05	-0.0014627	0	-0.102765	-0.135284	-9.44e-05	-0.945203	0	-3.7e-06	-0.0007192	0	-2.21984e-06	-2.36604e-06	-2.04597e-09	-4.7253e-06	0	-1.86253e-10	-1.56258e-08	0	-1.1103e-06	-1.69991e-06	-1.42368e-09	-1.39101e-06	0	-6.26627e-11	-3.17151e-09	0	-2.22821e-07	-2.93331e-07	-2.04684e-10	-2.04945e-06	0	-8.02256e-12	-1.55941e-09	0
Stevens	658065	-0.691927	-0.169494	-0.0002285	-10.9239	0	0	-0.0033	0	-0.346593	-0.070751	-0.0001587	-3.62944	0	0	-0.000669	0	-0.0693459	-0.0163658	-2.29e-05	-3.42659	0	0	-0.0003303	0	-1.05146e-06	-2.57564e-07	-3.4723e-10	-1.66e-05	0	0	-5.0147e-09	0	-5.26686e-07	-1.07514e-07	-2.41162e-10	-5.51533e-06	0	0	-1.01662e-09	0	-1.05379e-07	-2.48696e-08	-3.4799e-11	-5.20708e-06	0	0	-5.01926e-10	0
Thurston	190753	-2.85918	-0.10596	-0.0003605	-4.55799	0	-0.0662156	0	-0.170852	-1.43128	-0.0402516	-0.0002504	-2.81898	0	-0.0222436	0	-0.120806	-0.284715	-0.0087165	-3.57e-05	-4.17983	0	-0.002869	0	-0.0604061	-1.49889e-05	-5.55484e-07	-1.88988e-09	-2.38948e-05	0	-3.47128e-07	0	-8.9567e-07	-7.5033e-06	-2.11015e-07	-1.31269e-09	-1.47782e-05	0	-1.1661e-07	0	-6.33315e-07	-1.49259e-06	-4.56953e-08	-1.87153e-10	-2.19123e-05	0	-1.50404e-08	0	-3.16672e-07
Wahkiakum	74255	-0.0649484	-0.0096681	-2.6e-06	-3.06766	0	-0.0883798	0	-0.0675349	-0.0324611	-0.0014697	-2.2e-06	-2.04501	0	-0.0296996	0	-0.0433028	-0.0065098	-0.0066847	0	-2.13363	0	-0.0038303	0	-0.0216629	-8.74667e-07	-1.30201e-07	-3.50145e-11	-4.13125e-05	0	-1.19022e-06	0	-9.095e-07	-4.37157e-07	-1.97926e-08	-2.96276e-11	-2.75403e-05	0	-3.99968e-07	0	-5.83163e-07	-8.76682e-08	-9.00236e-08	0	-2.87338e-05	0	-5.1583e-08	0	-2.91737e-07
Walla Walla	336466	-0.0349572	-1.54413	-0.0040297	-0.236201	0	-0.0049668	-0.0510134	0	-0.0172527	-1.3357	-0.0028067	-0.0607658	0	-0.0016701	-0.0103323	0	-0.0034685	-0.222936	-0.0004033	-0.201493	0	-0.0002153	-0.0051002	0	-1.03895e-07	-4.58926e-06	-1.19766e-08	-7.02007e-07	0	-1.47617e-08	-1.51615e-07	0	-5.12763e-08	-3.96979e-06	-8.34171e-09	-1.806e-07	0	-4.96366e-09	-3.07083e-08	0	-1.03086e-08	-6.62582e-07	-1.19864e-09	-5.98853e-07	0	-6.39887e-10	-1.51582e-08	0
Whatcom	560034	-0.391762	-0.252682	-0.0006604	-2.61144	0	-0.060192	-0.0002409	-0.0244916	-0.195911	-0.386222	-0.0004598	-1.59438	0	-0.0202091	-4.9e-05	-0.015772	-0.0392006	-0.0567002	-6.63e-05	-1.86632	0	-0.0026051	-2.39e-05	-0.0078982	-6.99533e-07	-4.51191e-07	-1.17922e-09	-4.663e-06	0	-1.07479e-07	-4.30153e-10	-4.37324e-08	-3.49821e-07	-6.8964e-07	-8.21022e-10	-2.84694e-06	0	-3.60855e-08	-8.74948e-11	-2.81626e-08	-6.99969e-08	-1.01244e-07	-1.18386e-10	-3.33252e-06	0	-4.65169e-09	-4.2676e-11	-1.41031e-08
Whitman	564100	0	-3.37813	-0.0167716	-0.0622905	0	0	-0.0013157	0	0	-1.28318	-0.0116649	-0.0151167	0	0	-0.0002691	0	0	-0.194141	-0.0016768	-0.0525852	0	0	-0.000132	0	0	-5.98853e-06	-2.97316e-08	-1.10425e-07	0	0	-2.33239e-09	0	0	-2.27474e-06	-2.06788e-08	-2.67979e-08	0	0	-4.77043e-10	0	0	-3.44162e-07	-2.97252e-09	-9.32197e-08	0	0	-2.34001e-10	0
Yakima	1.1167e+06	-0.0194019	-1.46519	-0.0023183	-2.39988	-0.0021702	-0.418192	-0.271176	0	-0.0096342	-1.18809	-0.0016136	-0.837362	-0.0023447	-0.14063	-0.054795	0	-0.0019344	-0.145837	-0.0002317	-2.12516	-0.0014439	-0.0181222	-0.02715	0	-1.73743e-08	-1.31207e-06	-2.07603e-09	-2.14908e-06	-1.9434e-09	-3.74489e-07	-2.42836e-07	0	-8.62738e-09	-1.06393e-06	-1.44497e-09	-7.49854e-07	-2.09967e-09	-1.25933e-07	-4.90687e-08	0	-1.73225e-09	-1.30596e-07	-2.07486e-10	-1.90308e-06	-1.29301e-09	-1.62284e-08	-2.43127e-08	0

## Sheet: S9_dictionary
Pathway Abbreviation	Pathway Name
ACF	avoided conversion of forests to urban development
ag	agricultural practices
grass	restoration and avoided conversion of grassland
ifm	extended timber harvest
reforest	replanting forest after wildfire
rref	riparian reforestation
sage	avoided conversation of sagebrush-steppe to agricultural uses
tide	tidal wetland restoration
